# Supplementary material for: Exploring the mechanism of graphene-oxide reduction by hydrazine in a multi-epoxide environment with DFT calculations
Source: Royal Society of Chemistry journal article supplement (doi:10.1039/d3cp03574c), 2023-12-08
Supplement: d3cp03574c1.pdf [file d3cp03574c1.pdf]

## Supporting Information

### Exploring the Mechanism of Graphene-Oxide Reduction by Hydrazine in a Multi-Epoxy Environment with DFT Calculations

*Nguyen Tri Hieu, Dénes Szieberth, Eszter Makkos\**

#### Contents

|                                                                                |      |
|--------------------------------------------------------------------------------|------|
| Table S1: Basis Sets Comparison.....                                           | 2    |
| Table S2: Implicit solvent model with PCM.....                                 | 2    |
| Table S3: Basis Set Superposition Error .....                                  | 3    |
| Table S4: Geometrical Parameters .....                                         | 3    |
| Table S5: Formation Energies.....                                              | 3    |
| Figure S1: Starting positions SP1 – SP8 .....                                  | 4    |
| Figure S2: Starting complexes SC1' - SC3'.....                                 | 4    |
| Figure S3: Alternative Route 1.....                                            | 5    |
| Figure S4: Charge transfer within the intermediate structures of Route 1 ..... | 5    |
| Table S6: NPA charges for Route 1 .....                                        | 6    |
| Figure S5: Scan profile of ts2 via Route 2 .....                               | 6    |
| Figure S6: Alternative Route 2 .....                                           | 7    |
| Figure S7: 3E_1OH structure .....                                              | 7    |
| Table S7: Calculated Thermodynamic Properties.....                             | 8    |
| Table S8: Cartesian Coordinates .....                                          | 9-70 |

**Table S1: Comparison of Electronic Energy Profiles for Hydrazine Reduction via Route 1 using Various Basis Sets at the PBE-D Level (Values in brackets represent differences from the def2-TZVP basis set)**

| Species         | def2-QZVP<br>(kcal/mol) | def2-TZVPP<br>(kcal/mol) | def2-TZVP<br>(kcal/mol) | def2-TZVP<br>and def2-SVP<br>(kcal/mol) | def2-SVP<br>(kcal/mol) |
|-----------------|-------------------------|--------------------------|-------------------------|-----------------------------------------|------------------------|
| 2b + N2H4       | 0.0 (0.0)               | 0.0 (0.0)                | 0.0                     | 0.0 (0.0)                               | 0.0 (0.0)              |
| SC1             | -7.7 (0.8)              | -8.4 (0.1)               | -8.5                    | -8.7 (-0.2)                             | -12.1 (-3.6)           |
| ts0             | 16.3 (1.0)              | 15.6 (0.3)               | 15.3                    | 15.8 (0.5)                              | 13.5 (-1.8)            |
| int0            | 0.1 (0.7)               | -0.6 (0.0)               | -0.6                    | -0.5 (0.1)                              | -3.4 (-2.8)            |
| ts1             | 8.6 (0.8)               | 7.6 (-0.2)               | 7.8                     | 7.7 (-0.1)                              | 1.8 (-6.0)             |
| int1            | -17.8 (1.1)             | -18.9 (0.0)              | -18.9                   | -19.5 (-0.6)                            | -28.3 (-9.4)           |
| ts2             | -1.8 (0.7)              | -2.9 (-0.4)              | -2.5                    | -2.7 (-0.2)                             | -9.5 (-7.0)            |
| 3E + H2O + N2H2 | -21.5 (-1.7)            | -20.9 (-1.1)             | -19.8                   | -19.7 (0.1)                             | -12.4 (7.4)            |
| SC1'            | 0.0 (0.0)               | 0.0 (0.0)                | 0.0                     | 0.0 (0.0)                               | 0.0 (0.0)              |
| ts3             | 19.0 (0.5)              | 18.8 (0.3)               | 18.5                    | 18.4 (-0.1)                             | 16.6 (-1.9)            |
| int3            | 7.9 (0.2)               | 7.6 (-0.1)               | 7.7                     | 6.7 (-1.0)                              | 2.6 (-5.1)             |
| ts4             | 11.1 (0.2)              | 10.8 (-0.1)              | 10.9                    | 10.4 (-0.5)                             | 8.2 (-2.7)             |
| 2E + H2O + N2H2 | -9.2 (-2.2)             | -7.9 (-0.9)              | -7.0                    | -6.2 (0.8)                              | 3.4 (10.4)             |

**Table S2: Reaction Profiles of Hydrazine Reduction via Route 1 in Vacuum and Water Solvent at the PBE-D/Def2TZVP Level**

| Species         | Condition               |                        |
|-----------------|-------------------------|------------------------|
|                 | In vacuum<br>(kcal/mol) | In water<br>(kcal/mol) |
| 2b + N2H4       | 0.0                     | 0.0 (0.0)              |
| SC1             | -8.5                    | -6.0 (2.5)             |
| ts0             | 15.3                    | 14.4 (-0.9)            |
| int0            | -0.6                    | 1.8 (2.4)              |
| ts1             | 7.8                     | 8.6 (0.8)              |
| int1            | -18.9                   | -16.0 (2.9)            |
| ts2             | -2.5                    | -2.5 (0.0)             |
| 3E + H2O + N2H2 | -19.8                   | -23.9 (-4.1)           |
| SC1'            | 0.0                     | 0.0 (0.0)              |
| ts3             | 18.5                    | 16.4 (-2.1)            |
| int3            | 7.7                     | 6.8 (-0.9)             |
| ts4             | 10.9                    | 9.4 (-1.5)             |
| 2E + H2O + N2H2 | -7.0                    | -13.2 (-6.2)           |

**Table S3: Basis Set Superposition Error of Various Starting Complexes at the PBE-D/def2-TZVP Level (Values in brackets represent differences compared to def2-TZVP)**

|         | Species | def2TZVP (kcal/mol) | BSSE (kcal/mol) |
|---------|---------|---------------------|-----------------|
|         | 2b+N2H4 | 0.0                 | 0.0 (0.0)       |
| Route 1 | SC1     | -8.5                | -7.2 (1.3)      |
|         | int0    | -0.6                | 0.8 (1.4)       |
| Route 2 | SC2     | -9.2                | -7.9 (1.3)      |
| Route 3 | SC3     | -8.2                | -7.2 (1.0)      |

**Table S4: Geometrical Parameters of Different Starting Complexes**

| Species | O-H   | C-O1-C | C-O2-C | C-O3-C | C-O1-C-C | C-O2-C-C | C-O3-C-C | H-N-N-H |
|---------|-------|--------|--------|--------|----------|----------|----------|---------|
| SC1     | 2.23Å | 63.0°  | 63.1°  | 61.3°  | 109.9°   | 110.0°   | -109.4°  | 154.8°  |
| SC1'    | 2.27Å | N/A    | 61.4°  | 61.7°  | N/A      | 110.7°   | -107.5°  | 148.9°  |
| SC2     | 2.75Å | 63.2°  | 63.2°  | 61.4°  | 109.7°   | 109.5°   | -109.8°  | 153.9°  |
| SC2'    | 2.44Å | 61.5°  | 61.6°  | N/A    | 111.2°   | 111.4°   | N/A      | -144.0° |
| SC3     | 2.50Å | 62.9°  | 63.0°  | 61.8°  | 109.9°   | 110.1°   | -109.2°  | 148.8°  |
| SC3'    | 2.14Å | N/A    | 60.9°  | 60.4°  | N/A      | 111.9°   | -110.8°  | -150.9° |

**Table S5: Formation Energies in kcal/mol calculated with different reference molecules for the chemical potential of O and H atoms.**

**Ref1**  $E_f = E_{nE} - (E_{PAH} + n/2 E_{O_2})$  Eq. 1

$E_f = E_{2E\_2OH} - (E_{PAH} + 2E_{O_2} + E_{H_2})$  Eq.2

$E_f = E_{3E\_1OH\_N_2H_3} - (E_{PAH} + 2E_{O_2} + E_{N_2H_4})$  Eq.3

**Ref2**  $E_f = E_{2E\_2OH} - (E_{PAH} + 2E_{OH^-} + E_{O_2})$  Eq.4

$E_f = E_{3E\_1OH\_N_2H_3} - (E_{PAH} + 1.5E_{O_2} + E_{N_2H_3^-} + E_{OH^-})$  Eq.5

**Ref3**  $E_f = E_{2E\_2OH} - (E_{PAH} + E_{H_2O} + 1.5E_{O_2})$  Eq.6

$E_f = E_{3E\_1OH\_N_2H_3} - (E_{PAH} + 1.5E_{O_2} + E_{N_2H_2} + E_{H_2O})$  Eq.7

|             | Ref 1 | Ref 2 | Ref 3 |
|-------------|-------|-------|-------|
| 4E          | 46.8  | -     | -     |
| 3E          | 43.8  | -     | -     |
| 2E          | 44.8  | -     | -     |
| 2E_2OH      | -42.7 | -20.4 | 11.5  |
| 2E_op       | 28.0  | -     | -     |
| 3E_1OH_N2H3 | 17.6  | -22.4 | 34.4  |

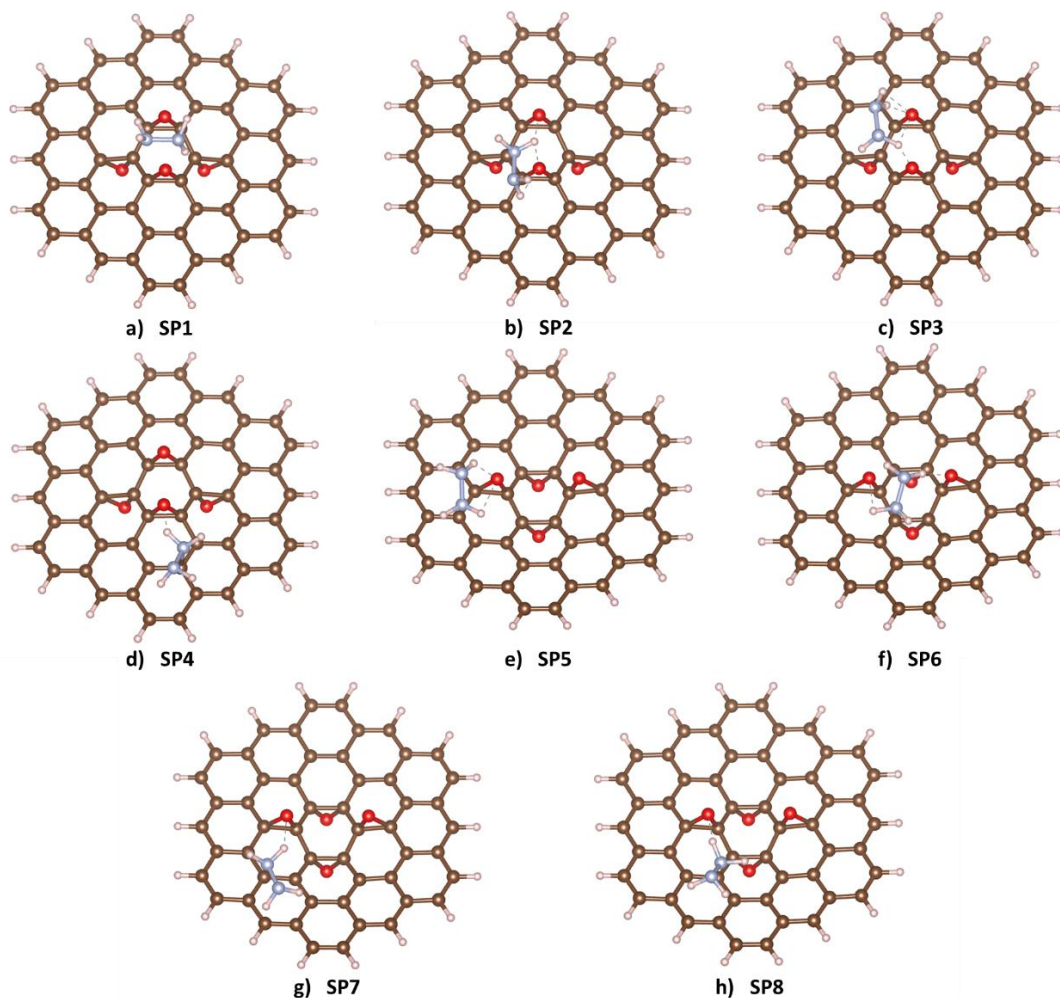

Figure S1: Ball and stick images of the eight different starting positions for the hydrazine to attack the 4E polycyclic aromatic hydrocarbon (red: oxygen, white: hydrogen, brown: carbon)

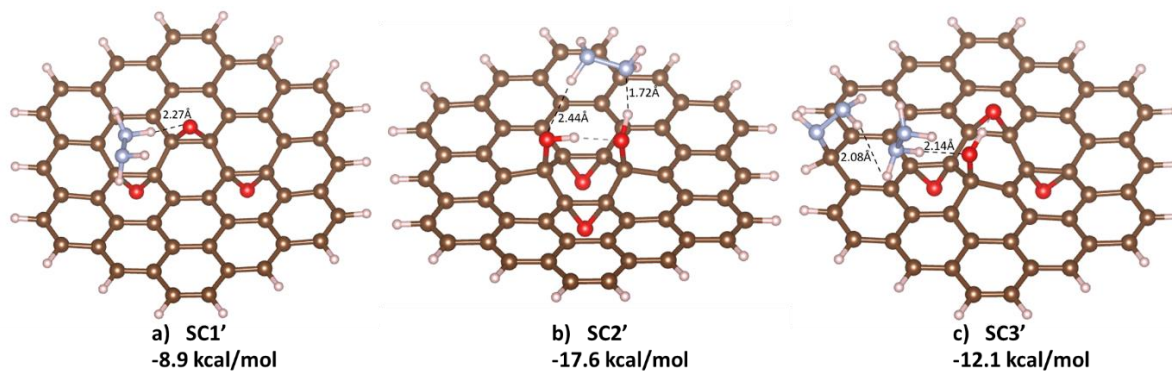

Figure S2: Ball and stick images of the following structures: The optimised starting complexes a) SC1', b) SC2', c) SC3' and their respective interaction energy (red: oxygen, white: hydrogen, brown: carbon)

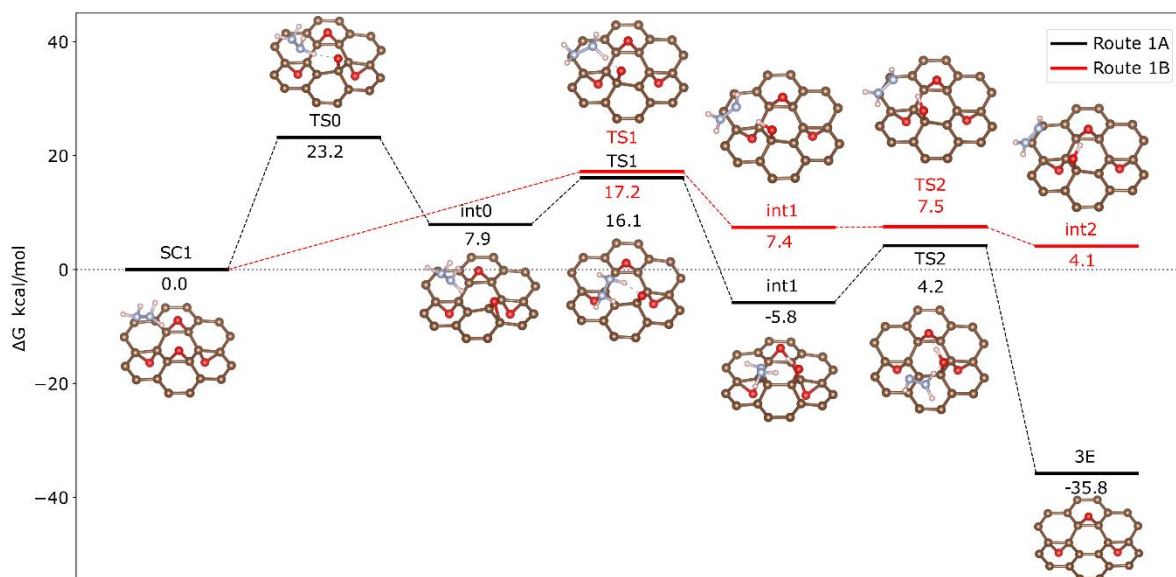

Figure S3 Alternative pathways for Route 1 with (A) and without (B) epoxy migration. Gibbs free energies are calculated at 298 K. The optimised geometries of each reaction step are visualised by ball and stick images of the inner part of the original PAH molecules. (red: oxygen, white: hydrogen, brown: carbon, blue: nitrogen)

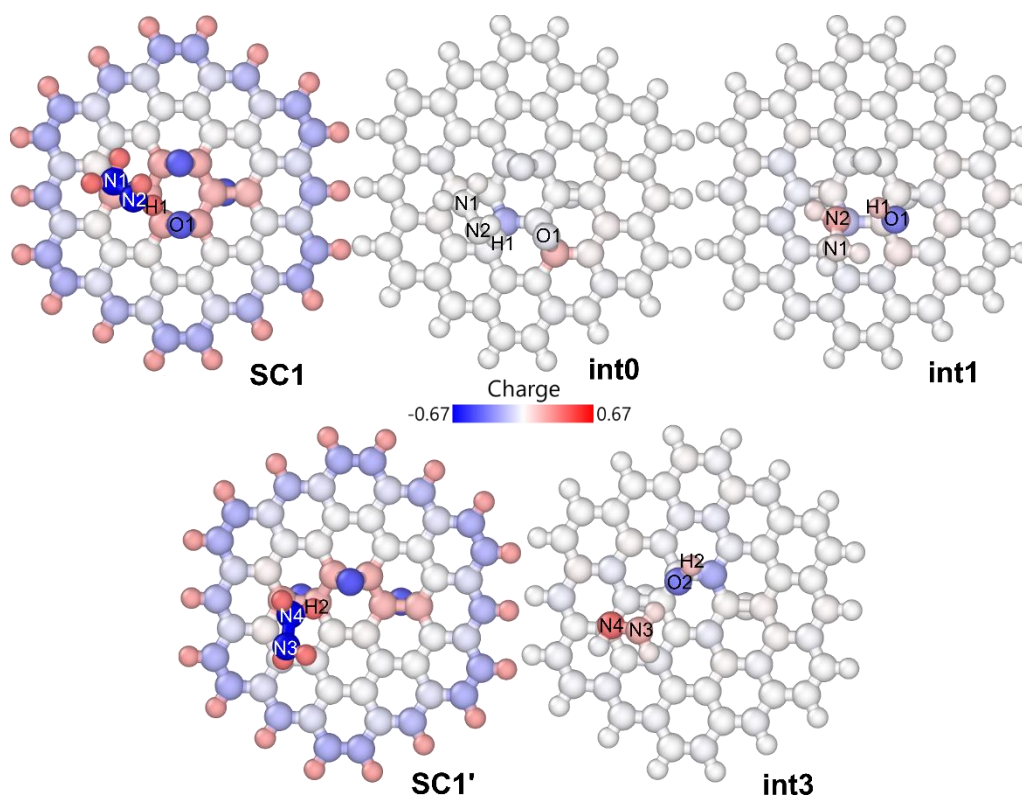

Figure S4: Structure images of the starting complexes and intermediates of Route 1 coloured by the charge transfer within the intermediates referenced to the absolute natural atomic charges of the starting complexes.

Table S6: Calculated natural atomic charges (a.u.) in hydrazine, diazene, the starting complexes and intermediate structures of Route 1 Figure 3.

|                               | N1    | N2    | Total (N <sub>2</sub> H <sub>4</sub><br>or<br>derivatives) | O1    | H1   | Total (OH) |
|-------------------------------|-------|-------|------------------------------------------------------------|-------|------|------------|
| N <sub>2</sub> H <sub>4</sub> | -0.66 | -0.66 | 0.00                                                       | -     | -    | -          |
| SC1                           | -0.67 | -0.66 | 0.03                                                       | -0.39 | -    | -          |
| int0                          | -0.67 | -0.66 | 0.03                                                       | -0.41 | -    | -          |
| int1                          | -0.63 | -0.46 | -0.02                                                      | -0.69 | 0.50 | -0.19      |
|                               | N3    | N4    | total                                                      | O2    | H2   | Total (OH) |
| SC1'                          | -0.66 | -0.67 | 0.04                                                       | -0.42 | -    | -          |
| int3                          | -0.48 | -0.33 | 0.30                                                       | -0.73 | 0.48 | -0.25      |
| N <sub>2</sub> H <sub>2</sub> | -0.27 | -0.27 | 0.00                                                       | -     | -    | -          |

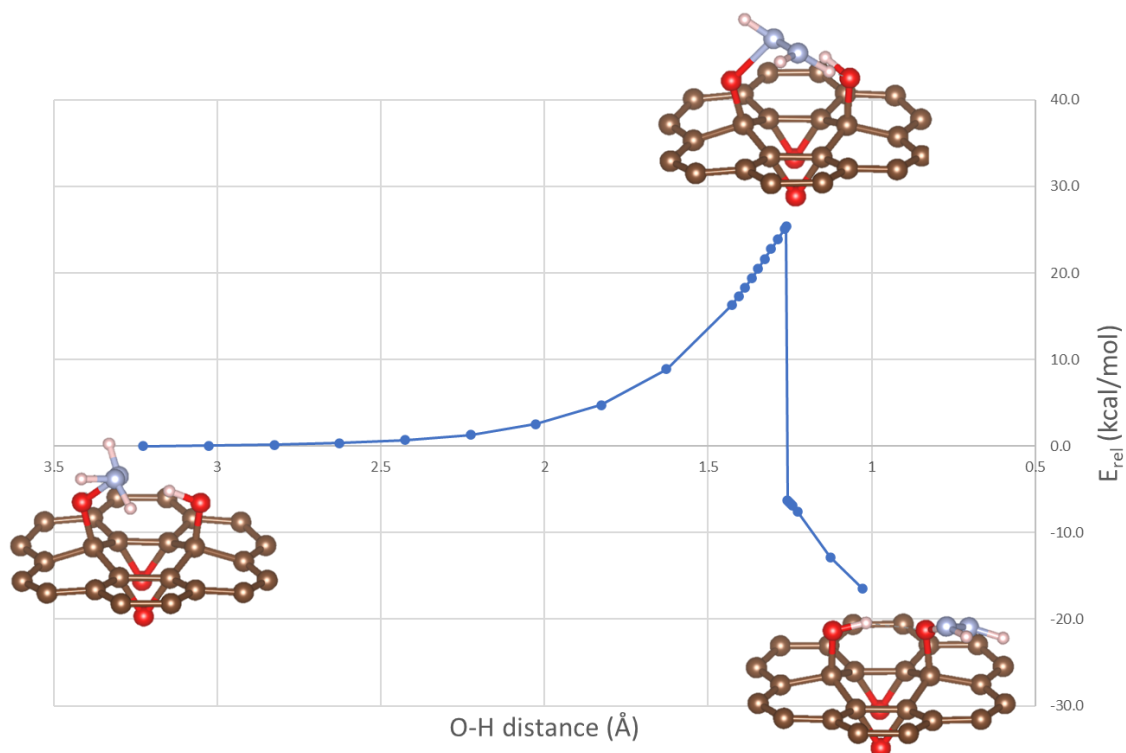

Figure S5: Scan profile of TS2 via Route 2 at the PBE-D Level with a Mixture of Basis Sets (def2-TZVP and def2-SVP)

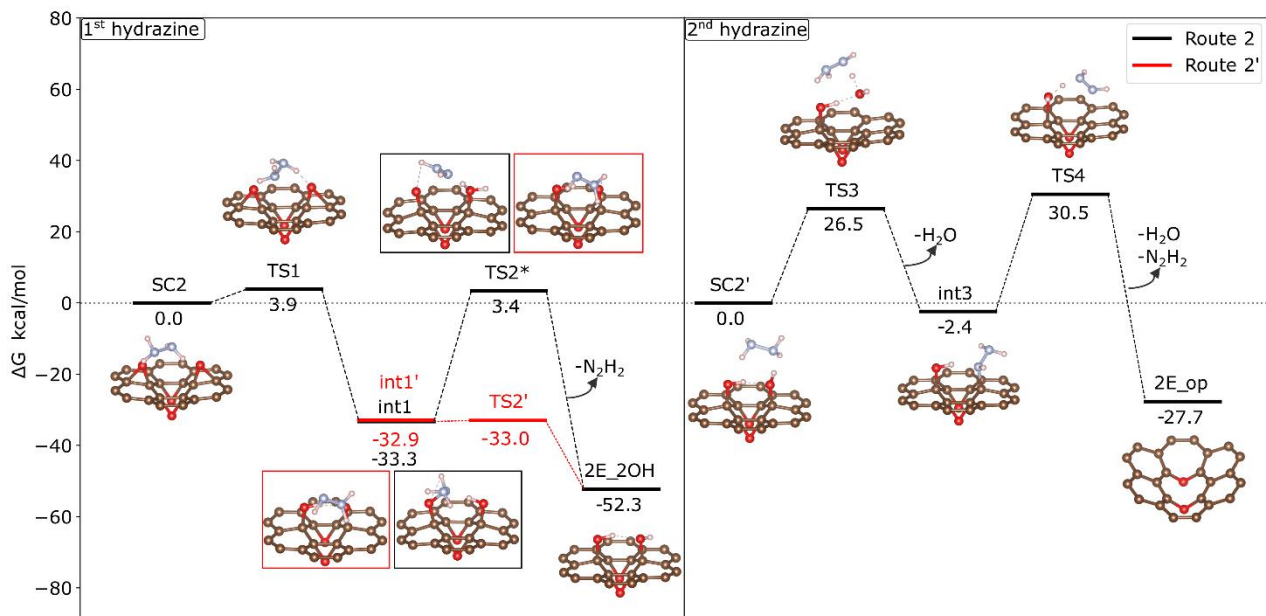

**Figure S6: Alternative second protonation step for Route 2. Gibbs free energies are calculated at 298 K. Route 2' represents an analogue pathway where the intermediate structure int1' is energetically almost identical to int1 but does not contain a hydrazinol group (no O-N bond). The second protonation is spontaneous from this structure; the 2E\_2OH product forms with a practically zero Gibbs free energy barrier ( $\Delta G(\text{TS2}'\text{-int1}') = -0.10 \text{ kcal}\cdot\text{mol}^{-1}$ , the electronic energy difference is  $\Delta E(\text{TS2}'\text{-int1}') = +0.55 \text{ kcal/mol}$ ). The optimised geometries of each reaction step are visualised by ball and stick images of the inner part of the original PAH molecules. (red: oxygen, white: hydrogen, brown: carbon, blue: nitrogen)**

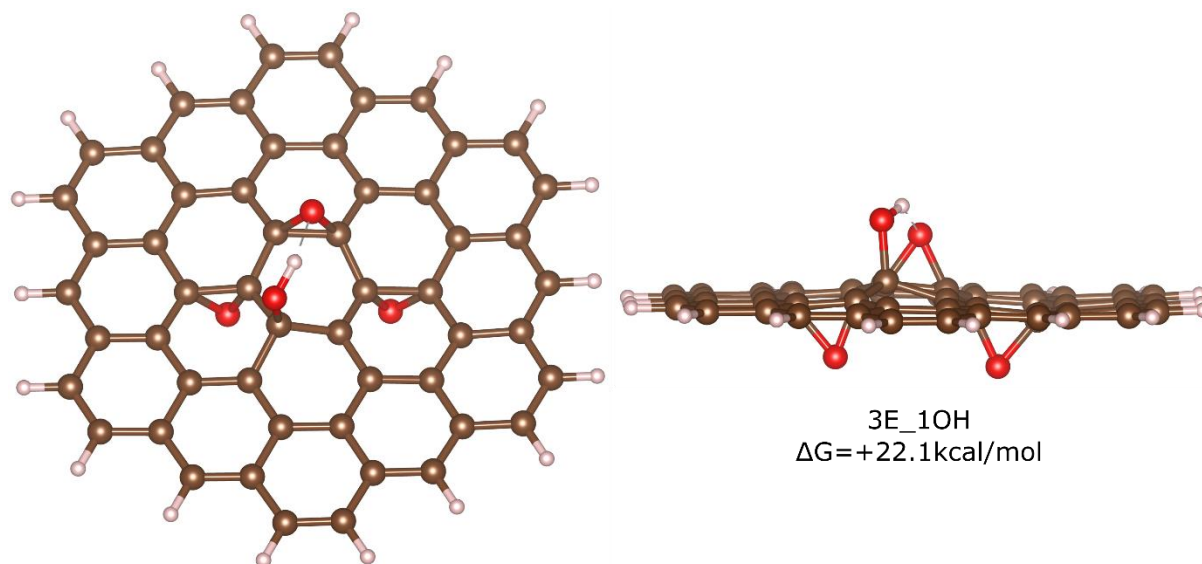

**Figure S7: Ball and stick images of 3E\_1OH structure (red: oxygen, white: hydrogen, brown: carbon)**

**Table S7: Calculated Total Energies ( $E_{\text{tot}}$ ), Enthalpies (H), Gibbs Free-Energies (G), and Entropies (S) for Species Concerned in this Study at the Level of PBE-D/def2-TZVP**

|          | species                              | $E_{\text{tot}}$ (a.u.) | H (a.u.)   | G (a.u.)   | S (cal K <sup>-1</sup> mol <sup>-1</sup> ) |
|----------|--------------------------------------|-------------------------|------------|------------|--------------------------------------------|
|          | N <sub>2</sub> H <sub>4</sub>        | -111.7799               | -111.7249  | -111.7501  | 55.149                                     |
|          | H <sub>2</sub> O                     | -76.3767                | -76.3532   | -76.3738   | 45.152                                     |
|          | N <sub>2</sub> H <sub>2</sub>        | -110.5544               | -110.5251  | -110.5489  | 52.216                                     |
|          | 4E                                   | -2367.5554              | -2366.9950 | -2367.0839 | 189.159                                    |
| Route 1A | SC1                                  | -2479.3488              | -2478.7304 | -2478.8325 | 216.738                                    |
|          | ts0                                  | -2479.3109              | -2478.6949 | -2478.7955 | 213.738                                    |
|          | int0                                 | -2479.3363              | -2478.7181 | -2478.8199 | 216.184                                    |
|          | ts1                                  | -2479.3228              | -2478.7083 | -2478.8068 | 209.340                                    |
|          | int1                                 | -2479.3653              | -2478.7466 | -2478.8418 | 202.385                                    |
|          | ts2                                  | -2479.3393              | -2478.7277 | -2478.8258 | 208.542                                    |
|          | 3E                                   | -2292.4357              | -2291.8791 | -2291.9669 | 186.838                                    |
|          | SC1'                                 | -2404.2297              | -2403.6147 | -2403.7155 | 214.216                                    |
|          | ts3                                  | -2404.2003              | -2403.5924 | -2403.6904 | 208.281                                    |
|          | int3                                 | -2404.2174              | -2403.6040 | -2403.7012 | 206.482                                    |
|          | ts4                                  | -2404.2124              | -2403.6030 | -2403.6997 | 205.550                                    |
|          | 2E                                   | -2217.3098              | -2216.7567 | -2216.8435 | 184.586                                    |
| Route 1B | ts1                                  | -2479.3218              | -2478.7070 | -2478.8050 | 208.299                                    |
|          | int1                                 | -2479.3397              | -2478.7231 | -2478.8207 | 207.337                                    |
|          | ts2                                  | -2479.3394              | -2478.7238 | -2478.8205 | 205.548                                    |
|          | int2                                 | -2479.3451              | -2478.7240 | -2478.8260 | 216.685                                    |
| Route 2  | SC2                                  | -2479.3499              | -2478.7316 | -2478.8337 | 216.852                                    |
|          | ts1                                  | -2479.3455              | -2478.7289 | -2478.8275 | 209.585                                    |
|          | int1                                 | -2479.4115              | -2478.7904 | -2478.8868 | 204.813                                    |
|          | ts2                                  | -2479.3473              | -2478.8282 | -2478.7319 | 202.700                                    |
|          | 2E_2OH                               | -2368.8639              | -2368.2776 | -2368.3682 | 192.656                                    |
|          | SC2'                                 | -2480.6718              | -2480.0274 | -2480.1269 | 211.387                                    |
|          | ts3                                  | -2480.6191              | -2479.9835 | -2480.0847 | 214.934                                    |
|          | int3                                 | -2404.2810              | -2403.6641 | -2403.7570 | 197.546                                    |
|          | ts4                                  | -2404.2145              | -2403.6070 | -2403.7045 | 207.252                                    |
|          | 2E_op                                | -2217.3365              | -2216.7826 | -2216.8686 | 183.133                                    |
|          | int1'                                | -2479.4068              | -2478.7874 | -2478.8861 | 209.731                                    |
|          | ts2'                                 | -2479.4059              | -2478.7882 | -2478.8863 | 208.531                                    |
| Route 3  | SC3                                  | -2479.3483              | -2478.7299 | -2478.8324 | 217.747                                    |
|          | ts1                                  | -2479.3233              | -2478.7095 | -2478.8072 | 207.600                                    |
|          | int1                                 | -2479.3369              | -2478.7200 | -2478.8192 | 210.878                                    |
|          | ts2                                  | -2479.3370              | -2478.7211 | -2478.8186 | 207.112                                    |
|          | 3E_1OH_N <sub>2</sub> H <sub>3</sub> | -2479.3817              | -2478.7617 | -2478.8584 | 205.515                                    |
|          | SC3'                                 | -2591.1809              | -2590.5025 | -2590.6101 | 228.355                                    |
|          | ts3                                  | -2591.1472              | -2590.4743 | -2590.5805 | 225.531                                    |
|          | 3E_N <sub>2</sub> H <sub>3</sub>     | -2403.6289              | -2403.1205 | -2403.0245 | 201.973                                    |
|          | 3E_1OH_N <sub>2</sub> H <sub>2</sub> | -2478.0606              | -2477.4668 | -2477.5624 | 203.281                                    |
|          | 3E_1OH_N <sub>2</sub> H              | -2477.0080              | -2476.4337 | -2476.5263 | 196.776                                    |



**Table S8: Calculated Cartesian Coordinates for Species Concerned in this Study at the Level of PBE-D/def2-TZVP**

|  | species                       | Cartesian coordinates (x, y, z) |           |           |           |
|--|-------------------------------|---------------------------------|-----------|-----------|-----------|
|  | N <sub>2</sub> H <sub>4</sub> | N                               | 0.710596  | 0.100127  | 0.076494  |
|  |                               | N                               | -0.710596 | -0.100127 | 0.076494  |
|  |                               | H                               | 1.144907  | -0.794567 | 0.306714  |
|  |                               | H                               | 1.064110  | 0.386855  | -0.842172 |
|  |                               | H                               | -1.144907 | 0.794566  | 0.306715  |
|  |                               | H                               | -1.064110 | -0.386854 | -0.842172 |
|  | H <sub>2</sub> O              | O                               | 0.000000  | 0.000000  | 0.119431  |
|  |                               | H                               | -0.000000 | -0.765881 | -0.477724 |
|  |                               | H                               | 0.000000  | 0.765881  | -0.477724 |
|  | N <sub>2</sub> H <sub>2</sub> | N                               | 0.121079  | -0.621528 | 0.000000  |
|  |                               | N                               | 0.121079  | 0.621528  | -0.000000 |
|  |                               | H                               | -0.847555 | -1.034067 | 0.000000  |
|  |                               | H                               | -0.847555 | 1.034067  | 0.000000  |
|  | 4E                            | C                               | 0.544046  | 6.203650  | -0.165578 |
|  |                               | C                               | -0.837560 | 6.171355  | -0.163889 |
|  |                               | C                               | -1.563470 | 4.938099  | -0.071731 |
|  |                               | C                               | -0.817449 | 3.709039  | 0.066073  |
|  |                               | C                               | 0.640304  | 3.742953  | 0.064172  |
|  |                               | C                               | 1.327272  | 5.005793  | -0.075318 |
|  |                               | C                               | -1.522528 | 2.492026  | 0.133678  |
|  |                               | C                               | -2.943850 | 2.427503  | -0.003979 |
|  |                               | C                               | -3.685721 | 3.667514  | -0.080797 |
|  |                               | C                               | -2.978093 | 4.883388  | -0.108242 |
|  |                               | C                               | -3.637146 | 1.187443  | -0.035405 |
|  |                               | C                               | -5.059545 | 1.126871  | -0.056102 |
|  |                               | C                               | -5.780758 | 2.378338  | -0.083971 |
|  |                               | C                               | -5.123825 | 3.587588  | -0.115942 |
|  |                               | C                               | -2.882155 | -0.067836 | -0.158794 |
|  |                               | C                               | -3.576647 | -1.358112 | -0.038293 |
|  |                               | C                               | -5.000261 | -1.365184 | -0.059548 |
|  |                               | C                               | -5.709470 | -0.135271 | -0.081676 |
|  |                               | C                               | -2.825501 | -2.564188 | -0.006054 |
|  |                               | C                               | -3.507281 | -3.837659 | -0.087551 |
|  |                               | C                               | -4.947494 | -3.826107 | -0.125176 |
|  |                               | C                               | -5.661132 | -2.649458 | -0.091355 |
|  |                               | C                               | -1.402575 | -2.560984 | 0.133678  |
|  |                               | C                               | -0.721708 | -1.304462 | 0.469326  |
|  |                               | C                               | -1.402398 | -0.032205 | 0.085728  |
|  |                               | C                               | -0.785281 | 1.271158  | 0.464989  |
|  |                               | C                               | -0.639719 | -3.742220 | 0.065264  |
|  |                               | C                               | -1.326537 | -5.005161 | -0.076380 |
|  |                               | C                               | -2.742053 | -5.018059 | -0.115930 |
|  |                               | C                               | 0.787690  | -1.271367 | 0.465441  |
|  | C                             | 1.402555                        | 0.032561  | 0.082061  |           |
|  | C                             | 0.724080                        | 1.305831  | 0.462862  |           |
|  | C                             | 1.402046                        | 2.560307  | 0.129620  |           |
|  | C                             | 0.818844                        | -3.706103 | 0.066823  |           |
|  | C                             | 1.563538                        | -4.936020 | -0.072269 |           |

|          |     |                                 |
|----------|-----|---------------------------------|
|          |     | C 0.838103 -6.169517 -0.165474  |
|          |     | C -0.543301 -6.202809 -0.168100 |
|          |     | C 1.523377 -2.494115 0.133833   |
|          |     | C 2.940513 -2.428147 -0.004891  |
|          |     | C 3.634680 -1.187990 -0.037441  |
|          |     | C 2.881691 0.067783 -0.162062   |
|          |     | C 3.683953 -3.667094 -0.080360  |
|          |     | C 5.122075 -3.587673 -0.114654  |
|          |     | C 5.779073 -2.378628 -0.082931  |
|          |     | C 5.057147 -1.127652 -0.056566  |
|          |     | C 3.575863 1.357588 -0.040949   |
|          |     | C 4.999495 1.364450 -0.060640   |
|          |     | C 5.707798 0.134252 -0.081910   |
|          |     | C 2.824562 2.563325 -0.009898   |
|          |     | C 3.507015 3.836929 -0.088099   |
|          |     | C 4.947276 3.825176 -0.124572   |
|          |     | C 5.660794 2.648505 -0.091070   |
|          |     | C 2.742792 5.017987 -0.114827   |
|          |     | C 2.977207 -4.882522 -0.108144  |
|          |     | O -0.029702 1.323151 1.690099   |
|          |     | H -6.761942 -2.670873 -0.110167 |
|          |     | H -6.809944 -0.161362 -0.118135 |
|          |     | H -6.881364 2.347436 -0.101307  |
|          |     | H -5.697925 4.526124 -0.164141  |
|          |     | H -5.476425 -4.790657 -0.176666 |
|          |     | H -3.260424 -5.988108 -0.183328 |
|          |     | H -3.542690 5.827441 -0.172820  |
|          |     | H -1.069324 -7.166344 -0.255151 |
|          |     | H -1.408813 7.109051 -0.248527  |
|          |     | H 6.879642 -2.347344 -0.099394  |
|          |     | H 6.808324 0.159465 -0.116963   |
|          |     | H 6.761620 2.669657 -0.108701   |
|          |     | H 5.476174 4.789817 -0.174493   |
|          |     | H 5.695651 -4.526548 -0.161715  |
|          |     | H 3.541589 -5.826769 -0.172309  |
|          |     | H 3.262047 5.987636 -0.180616   |
|          |     | H 1.410215 -7.106601 -0.250571  |
|          |     | H 1.070601 7.167039 -0.251560   |
|          |     | O 0.038674 -1.322845 1.694827   |
|          |     | O -1.873240 -0.043243 -1.259181 |
|          |     | O 1.871893 0.042401 -1.262661   |
| Route 1A | SC1 | C 0.504527 1.366424 0.268562    |
|          |     | O -0.204179 1.317249 1.524619   |
|          |     | C -0.993328 1.195109 0.323088   |
|          |     | C -1.850445 2.345030 0.027049   |
|          |     | C -3.264210 2.152780 -0.055039  |
|          |     | C -4.116618 3.321281 -0.099454  |
|          |     | C -3.522629 4.595914 -0.148447  |
|          |     | C -2.118334 4.778040 -0.162397  |
|          |     | C -1.260641 3.620701 -0.058489  |
|          |     | C 0.187268 3.786735 -0.108316   |
|          |     | C 0.753205 5.106993 -0.258523   |

|  |  |   |           |           |           |
|--|--|---|-----------|-----------|-----------|
|  |  | C | -0.137448 | 6.229377  | -0.316636 |
|  |  | C | -1.509755 | 6.072000  | -0.271269 |
|  |  | C | 1.054088  | 2.678190  | -0.076105 |
|  |  | C | -1.506561 | -0.159008 | -0.034262 |
|  |  | C | -2.984818 | -0.327122 | -0.217654 |
|  |  | C | -3.844164 | 0.855339  | -0.063101 |
|  |  | C | -5.255170 | 0.667253  | -0.028454 |
|  |  | C | -6.086035 | 1.849165  | -0.026378 |
|  |  | C | -5.542031 | 3.112489  | -0.080410 |
|  |  | C | -0.700571 | -1.364146 | 0.316974  |
|  |  | C | 0.797585  | -1.190419 | 0.259350  |
|  |  | C | 1.283018  | 0.161654  | -0.141469 |
|  |  | C | 2.737248  | 0.329289  | -0.430797 |
|  |  | C | 3.317045  | 1.674753  | -0.317233 |
|  |  | C | 2.465040  | 2.809067  | -0.255617 |
|  |  | C | 3.028091  | 4.139139  | -0.339712 |
|  |  | C | 2.160292  | 5.246716  | -0.336862 |
|  |  | C | 1.627149  | -2.342611 | -0.097553 |
|  |  | C | 3.030598  | -2.150884 | -0.286067 |
|  |  | C | 3.605088  | -0.852897 | -0.336114 |
|  |  | C | 5.015097  | -0.665876 | -0.387118 |
|  |  | C | 5.548343  | 0.649460  | -0.414998 |
|  |  | C | 4.732843  | 1.810525  | -0.367424 |
|  |  | C | 5.277209  | 3.148221  | -0.401564 |
|  |  | C | 4.462024  | 4.257208  | -0.409786 |
|  |  | C | -1.276817 | -2.675713 | 0.013547  |
|  |  | C | -0.414908 | -3.785116 | -0.080524 |
|  |  | C | 1.032830  | -3.618951 | -0.135385 |
|  |  | C | 1.881330  | -4.776600 | -0.298161 |
|  |  | C | 3.283163  | -4.594438 | -0.383708 |
|  |  | C | 3.878668  | -3.319497 | -0.381870 |
|  |  | C | 5.302356  | -3.110747 | -0.455884 |
|  |  | C | 5.846504  | -1.846511 | -0.437125 |
|  |  | C | -0.989592 | -5.105572 | -0.191184 |
|  |  | C | -0.105064 | -6.228049 | -0.310580 |
|  |  | C | 1.267006  | -6.070987 | -0.361429 |
|  |  | C | -2.697690 | -2.806846 | -0.067777 |
|  |  | C | -3.264639 | -4.137277 | -0.118336 |
|  |  | C | -2.398667 | -5.244962 | -0.174754 |
|  |  | C | -3.555316 | -1.673557 | -0.069205 |
|  |  | C | -4.972299 | -1.808586 | -0.034155 |
|  |  | C | -5.515126 | -3.147434 | -0.037953 |
|  |  | C | -4.700393 | -4.255359 | -0.098182 |
|  |  | C | -5.790208 | -0.647927 | -0.028737 |
|  |  | O | 1.700110  | 0.217550  | -1.504422 |
|  |  | O | 0.098258  | -1.308498 | 1.515984  |
|  |  | O | -2.025627 | -0.214982 | -1.359553 |
|  |  | N | 2.869721  | -0.263438 | 2.720303  |
|  |  | N | 1.988270  | 0.360626  | 3.669090  |
|  |  | H | 6.371228  | 3.266830  | -0.442792 |
|  |  | H | 6.641165  | 0.774526  | -0.474133 |
|  |  | H | 6.938968  | -1.715062 | -0.481936 |

|  |     |                                 |
|--|-----|---------------------------------|
|  |     | H 5.957596 -3.993436 -0.521319  |
|  |     | H 4.901601 5.265469 -0.463315   |
|  |     | H 2.588316 6.259604 -0.407736   |
|  |     | H 3.928421 -5.484038 -0.464553  |
|  |     | H 0.296811 7.236865 -0.412210   |
|  |     | H 1.917286 -6.953494 -0.466833  |
|  |     | H -7.179317 1.719663 -0.001768  |
|  |     | H -6.884405 -0.772960 -0.021615 |
|  |     | H -6.609440 -3.267950 -0.013086 |
|  |     | H -5.141875 -5.263865 -0.126857 |
|  |     | H -6.199482 3.995659 -0.104350  |
|  |     | H -4.171965 5.485318 -0.188011  |
|  |     | H -2.830856 -6.257609 -0.219582 |
|  |     | H -2.165785 6.954522 -0.331177  |
|  |     | H -0.545152 -7.235475 -0.375719 |
|  |     | H 1.124147 0.578207 3.166116    |
|  |     | H 1.733561 -0.287846 4.421521   |
|  |     | H 3.828494 -0.109655 3.035106   |
|  |     | H 2.721412 -1.276717 2.657230   |
|  | ts0 | C 2.049034 -5.360744 -0.212243  |
|  |     | C 0.656571 -5.121432 -0.275051  |
|  |     | C 0.169664 -3.764080 -0.201696  |
|  |     | C 1.087353 -2.707900 -0.057167  |
|  |     | C 2.486917 -2.946809 -0.081761  |
|  |     | C 2.977233 -4.307654 -0.124057  |
|  |     | C 0.581428 -1.361965 0.404946   |
|  |     | C -0.835631 -1.093372 -0.061401 |
|  |     | C -1.736998 -2.142199 -0.244449 |
|  |     | C -1.246708 -3.496308 -0.260551 |
|  |     | C -1.263050 0.282477 -0.311789  |
|  |     | C -2.734275 0.569899 -0.518438  |
|  |     | C -3.657298 -0.560853 -0.379135 |
|  |     | C -3.158662 -1.873663 -0.355818 |
|  |     | C -0.430036 1.420463 0.162420   |
|  |     | C -0.891743 2.784330 -0.109888  |
|  |     | C -2.294518 3.016912 -0.221352  |
|  |     | C -3.218812 1.937828 -0.282517  |
|  |     | C -2.774579 4.380186 -0.198854  |
|  |     | C -1.835285 5.431627 -0.181173  |
|  |     | C -0.440898 5.196725 -0.153426  |
|  |     | C 0.040738 3.837483 -0.081181   |
|  |     | C 1.472430 3.577658 -0.027532   |
|  |     | C 2.405058 4.677142 -0.098612   |
|  |     | C 1.881939 6.013139 -0.159825   |
|  |     | C 0.523447 6.260763 -0.178685   |
|  |     | C 1.047406 1.160493 0.293784    |
|  |     | C 1.974312 2.264334 0.046233    |
|  |     | C 3.370933 1.981493 -0.042715   |
|  |     | C 4.301253 3.089683 -0.072296   |
|  |     | C 3.793971 4.402791 -0.093211   |
|  |     | C -4.619399 2.160752 -0.217394  |
|  |     | C -5.078597 3.527270 -0.150750  |

|  |      |   |           |           |           |
|--|------|---|-----------|-----------|-----------|
|  |      | C | -4.198087 | 4.587609  | -0.169367 |
|  |      | C | -5.063651 | -0.286321 | -0.304689 |
|  |      | C | -5.513376 | 1.049417  | -0.252429 |
|  |      | C | -4.078272 | -2.989060 | -0.371450 |
|  |      | C | -5.491763 | -2.704422 | -0.357523 |
|  |      | C | -5.964440 | -1.414118 | -0.303148 |
|  |      | C | -2.172643 | -4.577550 | -0.360419 |
|  |      | C | -3.569823 | -4.295690 | -0.385890 |
|  |      | C | 1.478792  | -0.218515 | -0.057627 |
|  |      | C | -0.304935 | -6.180037 | -0.384436 |
|  |      | C | -1.659939 | -5.919542 | -0.417720 |
|  |      | C | 3.411687  | -1.864614 | -0.058092 |
|  |      | C | 2.930473  | -0.482081 | -0.212229 |
|  |      | C | 3.860890  | 0.647226  | -0.067060 |
|  |      | C | 4.401168  | -4.512078 | -0.068369 |
|  |      | C | 5.280800  | -3.456247 | 0.007550  |
|  |      | C | 4.815232  | -2.089196 | -0.003758 |
|  |      | C | 5.699044  | -0.974756 | -0.003173 |
|  |      | C | 5.257675  | 0.372031  | -0.020360 |
|  |      | C | 5.710178  | 2.788620  | -0.058961 |
|  |      | C | 6.169178  | 1.492103  | -0.012685 |
|  |      | O | -1.787940 | 0.479247  | -1.642260 |
|  |      | O | 0.195044  | 1.271437  | 1.449040  |
|  |      | O | 0.455233  | -1.476113 | 1.766960  |
|  |      | O | 1.991179  | -0.321536 | -1.378706 |
|  |      | N | -2.555168 | -0.133624 | 2.580048  |
|  |      | N | -2.220911 | -1.454805 | 3.031678  |
|  |      | H | -7.047849 | -1.220777 | -0.265548 |
|  |      | H | -6.597056 | 1.244293  | -0.220045 |
|  |      | H | -6.163220 | 3.712891  | -0.106496 |
|  |      | H | -4.577579 | 5.621120  | -0.145740 |
|  |      | H | -6.194977 | -3.551730 | -0.371566 |
|  |      | H | -4.275757 | -5.141579 | -0.413289 |
|  |      | H | -2.198596 | 6.471932  | -0.184206 |
|  |      | H | -2.378574 | -6.750615 | -0.492985 |
|  |      | H | 0.155670  | 7.297805  | -0.226269 |
|  |      | H | 6.365269  | -3.640187 | 0.054939  |
|  |      | H | 6.783531  | -1.169610 | 0.015857  |
|  |      | H | 7.250748  | 1.287878  | 0.015388  |
|  |      | H | 6.423908  | 3.626979  | -0.074789 |
|  |      | H | 4.781715  | -5.545422 | -0.084767 |
|  |      | H | 2.414811  | -6.399525 | -0.239807 |
|  |      | H | 4.501315  | 5.247315  | -0.112992 |
|  |      | H | 0.058471  | -7.218398 | -0.433933 |
|  |      | H | 2.594063  | 6.852323  | -0.195456 |
|  |      | H | -1.299163 | -1.655585 | 2.612492  |
|  |      | H | -2.083400 | -1.469410 | 4.050280  |
|  |      | H | -3.535526 | 0.044437  | 2.800412  |
|  |      | H | -1.981689 | 0.595094  | 3.020677  |
|  | int0 | C | 2.700440  | -5.027902 | -0.080401 |
|  |      | C | 1.272835  | -4.989042 | -0.117948 |
|  |      | C | 0.598832  | -3.732414 | -0.044292 |

|  |  |   |           |           |           |
|--|--|---|-----------|-----------|-----------|
|  |  | C | 1.406806  | -2.530967 | 0.217011  |
|  |  | C | 2.874327  | -2.575227 | -0.012136 |
|  |  | C | 3.501822  | -3.871163 | -0.063189 |
|  |  | C | 0.696523  | -1.214829 | 0.213487  |
|  |  | C | -0.719997 | -1.171902 | -0.158152 |
|  |  | C | -1.466632 | -2.337786 | -0.244168 |
|  |  | C | -0.804226 | -3.632894 | -0.160992 |
|  |  | C | -1.305250 | 0.120811  | -0.479648 |
|  |  | C | -2.819577 | 0.217554  | -0.602237 |
|  |  | C | -3.575855 | -1.026823 | -0.430490 |
|  |  | C | -2.912748 | -2.265549 | -0.380222 |
|  |  | C | -0.616350 | 1.340432  | 0.033582  |
|  |  | C | -1.257876 | 2.646354  | -0.144099 |
|  |  | C | -2.680254 | 2.696153  | -0.230908 |
|  |  | C | -3.462024 | 1.508070  | -0.315227 |
|  |  | C | -3.331819 | 3.983659  | -0.150858 |
|  |  | C | -2.535301 | 5.147012  | -0.094219 |
|  |  | C | -1.123647 | 5.096393  | -0.074587 |
|  |  | C | -0.468895 | 3.809671  | -0.063797 |
|  |  | C | 0.986767  | 3.740024  | -0.001467 |
|  |  | C | 1.767542  | 4.954984  | -0.009935 |
|  |  | C | 1.070622  | 6.213662  | -0.021339 |
|  |  | C | -0.306127 | 6.280320  | -0.043670 |
|  |  | C | 0.867736  | 1.282058  | 0.176085  |
|  |  | C | 1.656509  | 2.504239  | 0.032539  |
|  |  | C | 3.079118  | 2.403618  | -0.024285 |
|  |  | C | 3.854529  | 3.624332  | -0.014876 |
|  |  | C | 3.176750  | 4.862818  | 0.002426  |
|  |  | C | -4.876702 | 1.548327  | -0.219847 |
|  |  | C | -5.506601 | 2.841590  | -0.109569 |
|  |  | C | -4.769335 | 4.006162  | -0.103204 |
|  |  | C | -5.007348 | -0.934988 | -0.333009 |
|  |  | C | -5.621187 | 0.330814  | -0.264664 |
|  |  | C | -3.679373 | -3.491794 | -0.357815 |
|  |  | C | -5.115809 | -3.389532 | -0.351275 |
|  |  | C | -5.751815 | -2.169535 | -0.315877 |
|  |  | C | -1.596420 | -4.832390 | -0.261535 |
|  |  | C | -3.010399 | -4.727967 | -0.329441 |
|  |  | C | 1.498297  | -0.012888 | -0.185302 |
|  |  | C | 0.467015  | -6.168351 | -0.226064 |
|  |  | C | -0.914148 | -6.090671 | -0.278159 |
|  |  | C | 3.625049  | -1.410002 | -0.097722 |
|  |  | C | 2.963310  | -0.094318 | -0.264868 |
|  |  | C | 3.743282  | 1.144385  | -0.081910 |
|  |  | C | 4.942980  | -3.901890 | -0.116660 |
|  |  | C | 5.690449  | -2.745054 | -0.128161 |
|  |  | C | 5.066464  | -1.444410 | -0.123387 |
|  |  | C | 5.785247  | -0.236516 | -0.129915 |
|  |  | C | 5.156182  | 1.050746  | -0.077539 |
|  |  | C | 5.287049  | 3.508210  | -0.017622 |
|  |  | C | 5.910796  | 2.277825  | -0.035656 |
|  |  | O | -1.922507 | 0.263422  | -1.764079 |

|  |     |                                 |
|--|-----|---------------------------------|
|  |     | O 0.005836 1.166374 1.338265    |
|  |     | O 1.043530 -1.829160 1.470742   |
|  |     | O 2.082702 -0.048874 -1.488452  |
|  |     | N -2.437703 -0.354748 2.574188  |
|  |     | N -1.839678 -1.530027 3.146385  |
|  |     | H -6.851100 -2.118691 -0.274768 |
|  |     | H -6.720246 0.385009 -0.212387  |
|  |     | H -6.605278 2.884655 -0.047084  |
|  |     | H -5.277308 4.981335 -0.042666  |
|  |     | H -5.704842 -4.319917 -0.345685 |
|  |     | H -3.606061 -5.654697 -0.351646 |
|  |     | H -3.031609 6.130007 -0.052721  |
|  |     | H -1.513976 -7.011610 -0.346823 |
|  |     | H -0.808717 7.260238 -0.047926  |
|  |     | H 6.790043 -2.798476 -0.152937  |
|  |     | H 6.886033 -0.276781 -0.150432  |
|  |     | H 7.010384 2.218078 -0.034032   |
|  |     | H 5.888235 4.430790 -0.005915   |
|  |     | H 5.443844 -4.882191 -0.146769  |
|  |     | H 3.195059 -6.011928 -0.114325  |
|  |     | H 3.768951 5.791987 0.018075    |
|  |     | H 0.966146 -7.149307 -0.260362  |
|  |     | H 1.666161 7.139962 -0.012413   |
|  |     | H -1.124137 -1.850291 2.489391  |
|  |     | H -1.348261 -1.311106 4.020383  |
|  |     | H -3.349550 -0.225997 3.014145  |
|  |     | H -1.877962 0.487727 2.744360   |
|  | ts1 | C -1.415358 -5.490756 -0.217002 |
|  |     | C -2.425173 -4.492777 -0.231537 |
|  |     | C -2.047733 -3.105948 -0.164687 |
|  |     | C -0.670863 -2.776357 -0.043637 |
|  |     | C 0.351357 -3.780446 -0.143773  |
|  |     | C -0.047578 -5.171226 -0.191500 |
|  |     | C -0.308483 -1.381489 0.348125  |
|  |     | C -1.310028 -0.337654 -0.085659 |
|  |     | C -2.645474 -0.678561 -0.258822 |
|  |     | C -3.038918 -2.075373 -0.213185 |
|  |     | C -0.857837 1.006191 -0.395867  |
|  |     | C -1.909986 2.121983 -0.558794  |
|  |     | C -3.312384 1.723715 -0.409855  |
|  |     | C -3.661372 0.359936 -0.389597  |
|  |     | C 0.468727 1.451350 0.112887    |
|  |     | C 0.880521 2.843719 -0.087882   |
|  |     | C -0.128901 3.846329 -0.184852  |
|  |     | C -1.510040 3.506251 -0.273057  |
|  |     | C 0.265364 5.234414 -0.109772   |
|  |     | C 1.639300 5.549341 -0.051009   |
|  |     | C 2.640997 4.553753 -0.025809   |
|  |     | C 2.248670 3.164571 -0.006908   |
|  |     | C 3.267922 2.124911 0.051187    |
|  |     | C 4.665453 2.487635 0.024156    |
|  |     | C 5.009465 3.883953 0.014197    |

|  |  |   |           |           |           |
|--|--|---|-----------|-----------|-----------|
|  |  | C | 4.044306  | 4.868458  | -0.000636 |
|  |  | C | 1.515434  | 0.391918  | 0.265290  |
|  |  | C | 2.919720  | 0.761797  | 0.084171  |
|  |  | C | 3.898260  | -0.272523 | -0.019541 |
|  |  | C | 5.296898  | 0.097304  | -0.018650 |
|  |  | C | 5.639936  | 1.464650  | 0.016020  |
|  |  | C | -2.523542 | 4.496148  | -0.186415 |
|  |  | C | -2.107535 | 5.873288  | -0.078890 |
|  |  | C | -0.775383 | 6.226673  | -0.069330 |
|  |  | C | -4.302994 | 2.762435  | -0.313942 |
|  |  | C | -3.896753 | 4.108657  | -0.238867 |
|  |  | C | -5.058617 | -0.023172 | -0.378422 |
|  |  | C | -6.044679 | 1.028525  | -0.365494 |
|  |  | C | -5.686983 | 2.356024  | -0.313362 |
|  |  | C | -4.428138 | -2.420307 | -0.300594 |
|  |  | C | -5.402759 | -1.384923 | -0.354651 |
|  |  | C | 1.085473  | -0.978832 | -0.112259 |
|  |  | C | -3.821540 | -4.805117 | -0.303243 |
|  |  | C | -4.781899 | -3.810622 | -0.328024 |
|  |  | C | 1.716300  | -3.436412 | -0.175290 |
|  |  | C | 2.117340  | -2.020799 | -0.284028 |
|  |  | C | 3.530925  | -1.644273 | -0.109635 |
|  |  | C | 0.995256  | -6.165470 | -0.213772 |
|  |  | C | 2.326385  | -5.817273 | -0.192587 |
|  |  | C | 2.740421  | -4.434005 | -0.175921 |
|  |  | C | 4.096448  | -4.036260 | -0.168425 |
|  |  | C | 4.509500  | -2.672164 | -0.113471 |
|  |  | C | 6.272848  | -0.958904 | -0.043381 |
|  |  | C | 5.897997  | -2.284604 | -0.071673 |
|  |  | O | -1.201171 | 1.527541  | -1.686440 |
|  |  | O | 0.818538  | 0.922951  | 1.418334  |
|  |  | O | -0.384815 | -1.790303 | 1.683987  |
|  |  | O | 1.453658  | -1.328926 | -1.445399 |
|  |  | N | -3.038934 | -0.600821 | 2.904912  |
|  |  | N | -1.780263 | -0.021836 | 2.987165  |
|  |  | H | -6.462386 | 3.136715  | -0.270866 |
|  |  | H | -4.667366 | 4.894174  | -0.192361 |
|  |  | H | -2.884606 | 6.651440  | -0.021513 |
|  |  | H | -0.486215 | 7.287612  | -0.010909 |
|  |  | H | -7.108441 | 0.743803  | -0.369996 |
|  |  | H | -6.468272 | -1.664598 | -0.374066 |
|  |  | H | 1.941870  | 6.608246  | -0.014349 |
|  |  | H | -5.848804 | -4.077995 | -0.383273 |
|  |  | H | 4.340928  | 5.929021  | -0.006218 |
|  |  | H | 3.103546  | -6.597194 | -0.198026 |
|  |  | H | 4.873768  | -4.816928 | -0.186041 |
|  |  | H | 6.664181  | -3.075413 | -0.078796 |
|  |  | H | 7.339798  | -0.686700 | -0.034983 |
|  |  | H | 0.703216  | -7.226863 | -0.243864 |
|  |  | H | -1.717190 | -6.549876 | -0.246455 |
|  |  | H | 6.705205  | 1.746086  | 0.024628  |
|  |  | H | -4.123931 | -5.863402 | -0.338904 |



|  |      |                                 |
|--|------|---------------------------------|
|  |      | H 6.075851 4.158687 0.015405    |
|  |      | H -1.019592 -0.660906 2.549609  |
|  |      | H -1.798285 0.894944 2.537798   |
|  |      | H -3.463189 -0.577867 1.964819  |
|  |      | H -2.976996 -1.570607 3.216005  |
|  | int1 | C -2.741085 -4.937875 -0.304583 |
|  |      | C -3.456788 -3.723598 -0.293014 |
|  |      | C -2.743049 -2.482641 -0.065317 |
|  |      | C -1.364090 -2.510073 0.121398  |
|  |      | C -0.627660 -3.716549 -0.061390 |
|  |      | C -1.340124 -4.965430 -0.216854 |
|  |      | C -0.619698 -1.322382 0.699181  |
|  |      | C -1.447602 0.063802 0.674320   |
|  |      | C -2.806487 0.003483 0.013125   |
|  |      | C -3.476499 -1.217104 -0.122828 |
|  |      | C -0.626788 1.204347 0.068824   |
|  |      | C -1.342818 2.477135 -0.270542  |
|  |      | C -2.812441 2.482856 -0.214510  |
|  |      | C -3.499712 1.240163 -0.203801  |
|  |      | C 0.811648 1.315692 0.445273    |
|  |      | C 1.532457 2.549463 0.123749    |
|  |      | C 0.796763 3.757936 -0.073981   |
|  |      | C -0.616965 3.755100 -0.177915  |
|  |      | C 1.524540 5.007784 -0.152702   |
|  |      | C 2.928981 4.981999 -0.123336   |
|  |      | C 3.659166 3.771686 -0.052168   |
|  |      | C 2.939924 2.525831 0.080278    |
|  |      | C 3.670882 1.268213 0.064075    |
|  |      | C 5.108110 1.277740 -0.080849   |
|  |      | C 5.783837 2.539432 -0.136324   |
|  |      | C 5.089293 3.734445 -0.122458   |
|  |      | C 1.570067 0.009393 0.419337    |
|  |      | C 2.995196 0.033306 0.091439    |
|  |      | C 3.679164 -1.203654 -0.111051  |
|  |      | C 5.124842 -1.188632 -0.203190  |
|  |      | C 5.796936 0.044823 -0.174731   |
|  |      | C -1.354243 4.972508 -0.273668  |
|  |      | C -0.611132 6.210395 -0.299608  |
|  |      | C 0.763378 6.225179 -0.258820   |
|  |      | C -3.501035 3.722252 -0.330682  |
|  |      | C -2.767032 4.936809 -0.362873  |
|  |      | C -4.930895 1.227516 -0.411724  |
|  |      | C -5.615596 2.489053 -0.521754  |
|  |      | C -4.937697 3.683984 -0.458117  |
|  |      | C -4.900154 -1.231337 -0.400539 |
|  |      | C -5.595326 -0.008136 -0.495045 |
|  |      | C 0.757935 -1.181803 0.041478   |
|  |      | C -4.874668 -3.683903 -0.496636 |
|  |      | C -5.565529 -2.491371 -0.549816 |
|  |      | C 0.790223 -3.719072 -0.123455  |
|  |      | C 1.504004 -2.440657 -0.248980  |
|  |      | C 2.975677 -2.431972 -0.185398  |

|  |     |                                 |
|--|-----|---------------------------------|
|  |     | C -0.578600 -6.184183 -0.292530 |
|  |     | C 0.795936 -6.171901 -0.267710  |
|  |     | C 1.529086 -4.930292 -0.216645  |
|  |     | C 2.945786 -4.886471 -0.295725  |
|  |     | C 3.673737 -3.673404 -0.262485  |
|  |     | C 5.807764 -2.451428 -0.309353  |
|  |     | C 5.116044 -3.639618 -0.319865  |
|  |     | O -0.825491 1.521294 -1.301088  |
|  |     | O 1.205936 0.651591 1.661051    |
|  |     | O -0.359809 -1.692883 2.062858  |
|  |     | O 0.921773 -1.552680 -1.317992  |
|  |     | N -2.726926 -0.149600 2.842023  |
|  |     | N -1.658349 0.456007 2.131892   |
|  |     | H -5.483050 4.637091 -0.538888  |
|  |     | H -3.316922 5.885637 -0.462769  |
|  |     | H -1.173003 7.154450 -0.374149  |
|  |     | H 1.308986 7.180495 -0.306863   |
|  |     | H -6.707998 2.478383 -0.660369  |
|  |     | H -6.685249 -0.023932 -0.654791 |
|  |     | H 3.482266 5.932776 -0.186194   |
|  |     | H -6.652295 -2.489460 -0.727117 |
|  |     | H 5.634560 4.688681 -0.191838   |
|  |     | H 1.362449 -7.114329 -0.323892  |
|  |     | H 3.499864 -5.834732 -0.379169  |
|  |     | H 5.657827 -4.595844 -0.387410  |
|  |     | H 6.906964 -2.448384 -0.374637  |
|  |     | H -1.124563 -7.136541 -0.379106 |
|  |     | H -3.293345 -5.883621 -0.424462 |
|  |     | H 6.896298 0.055718 -0.247537   |
|  |     | H -5.408169 -4.637567 -0.632349 |
|  |     | H 6.882127 2.541920 -0.216206   |
|  |     | H -0.313553 -0.819603 2.529965  |
|  |     | H -1.800350 1.466856 2.170402   |
|  |     | H -3.579212 -0.203507 2.268063  |
|  |     | H -2.441953 -1.111010 3.046237  |
|  | ts2 | C -3.934956 -3.980007 -0.391795 |
|  |     | C -4.306814 -2.615435 -0.383375 |
|  |     | C -3.267569 -1.610900 -0.332938 |
|  |     | C -1.923173 -2.009216 -0.250449 |
|  |     | C -1.546154 -3.387159 -0.284343 |
|  |     | C -2.589400 -4.389626 -0.348421 |
|  |     | C -0.928978 -0.994002 0.117667  |
|  |     | C -1.253234 0.385120 -0.236670  |
|  |     | C -2.587561 0.787049 -0.341108  |
|  |     | C -3.623985 -0.212138 -0.293053 |
|  |     | C -0.183172 1.353885 -0.457247  |
|  |     | C -0.529375 2.838855 -0.552448  |
|  |     | C -1.943671 3.198634 -0.389500  |
|  |     | C -2.936164 2.197695 -0.376507  |
|  |     | C 1.177025 1.052624 0.068455    |
|  |     | C 2.240116 2.050299 -0.081479   |
|  |     | C 1.874624 3.427022 -0.150437   |

|  |  |   |           |           |           |
|--|--|---|-----------|-----------|-----------|
|  |  | C | 0.512723  | 3.829606  | -0.235545 |
|  |  | C | 2.917157  | 4.423969  | -0.050710 |
|  |  | C | 4.258870  | 3.999820  | 0.018477  |
|  |  | C | 4.621758  | 2.632930  | 0.033726  |
|  |  | C | 3.580018  | 1.631945  | 0.017417  |
|  |  | C | 3.933355  | 0.217955  | 0.080216  |
|  |  | C | 5.322885  | -0.172131 | 0.110768  |
|  |  | C | 6.323111  | 0.857947  | 0.121285  |
|  |  | C | 5.988863  | 2.196963  | 0.090890  |
|  |  | C | 1.542358  | -0.387529 | 0.202082  |
|  |  | C | 2.945633  | -0.784824 | 0.080714  |
|  |  | C | 3.270515  | -2.174904 | 0.032554  |
|  |  | C | 4.664364  | -2.557072 | 0.103042  |
|  |  | C | 5.646700  | -1.549238 | 0.144693  |
|  |  | C | 0.137681  | 5.194774  | -0.126108 |
|  |  | C | 1.192109  | 6.173262  | -0.005613 |
|  |  | C | 2.519791  | 5.806176  | 0.004504  |
|  |  | C | -2.272158 | 4.588918  | -0.239863 |
|  |  | C | -1.241581 | 5.549755  | -0.157602 |
|  |  | C | -4.331386 | 2.571332  | -0.282151 |
|  |  | C | -4.651050 | 3.972962  | -0.213932 |
|  |  | C | -3.668877 | 4.937252  | -0.181184 |
|  |  | C | -5.003589 | 0.187419  | -0.285286 |
|  |  | C | -5.321294 | 1.568962  | -0.242774 |
|  |  | C | 0.492736  | -1.360842 | -0.208625 |
|  |  | C | -5.673027 | -2.179520 | -0.361570 |
|  |  | C | -6.008569 | -0.837286 | -0.302051 |
|  |  | C | -0.191594 | -3.797597 | -0.228618 |
|  |  | C | 0.870890  | -2.789785 | -0.326079 |
|  |  | C | 2.265862  | -3.176005 | -0.065557 |
|  |  | C | -2.198248 | -5.776290 | -0.326423 |
|  |  | C | -0.877762 | -6.152032 | -0.227468 |
|  |  | C | 0.180913  | -5.172100 | -0.176088 |
|  |  | C | 1.550066  | -5.530572 | -0.091158 |
|  |  | C | 2.587328  | -4.561150 | -0.013581 |
|  |  | C | 4.972574  | -3.963230 | 0.136970  |
|  |  | C | 3.981926  | -4.918962 | 0.099450  |
|  |  | O | -0.198585 | 2.024355  | -1.726489 |
|  |  | O | 1.187908  | 0.403699  | 1.383016  |
|  |  | O | -0.996912 | -1.094262 | 1.828468  |
|  |  | O | 0.709782  | -1.878374 | -1.519091 |
|  |  | N | -3.346812 | -0.385352 | 2.427729  |
|  |  | N | -3.603973 | 0.674053  | 3.064546  |
|  |  | H | -3.940757 | 6.001552  | -0.102283 |
|  |  | H | -1.514202 | 6.614093  | -0.079305 |
|  |  | H | 0.913071  | 7.236296  | 0.064511  |
|  |  | H | 3.305122  | 6.574870  | 0.076145  |
|  |  | H | -5.712067 | 4.264293  | -0.164916 |
|  |  | H | -6.380645 | 1.869240  | -0.196943 |
|  |  | H | 5.054943  | 4.759497  | 0.078201  |
|  |  | H | -7.067497 | -0.534991 | -0.284229 |
|  |  | H | 6.780647  | 2.962197  | 0.106049  |

|  |    |                                 |
|--|----|---------------------------------|
|  |    | H -0.607139 -7.219103 -0.196323 |
|  |    | H 1.819394 -6.598102 -0.067761  |
|  |    | H 4.245572 -5.987609 0.137230   |
|  |    | H 6.029761 -4.265671 0.198538   |
|  |    | H -2.988407 -6.541757 -0.378561 |
|  |    | H -4.726323 -4.746770 -0.415727 |
|  |    | H 6.707640 -1.842216 0.200119   |
|  |    | H -6.466257 -2.943409 -0.385502 |
|  |    | H 7.381814 0.556518 0.156240    |
|  |    | H -0.315114 -0.424816 2.077545  |
|  |    | H -4.628779 0.753295 3.209037   |
|  |    | H -4.107905 -1.033066 2.160356  |
|  |    | H -2.216574 -0.680060 2.163498  |
|  | 3E | C 5.718104 -2.480688 -0.213179  |
|  |    | C 5.030714 -1.216598 -0.100682  |
|  |    | C 3.618146 -1.242108 0.048364   |
|  |    | C 2.891784 -2.463266 0.020072   |
|  |    | C 3.601188 -3.720317 -0.079984  |
|  |    | C 5.036044 -3.676721 -0.181407  |
|  |    | C 2.861275 -4.917899 -0.103393  |
|  |    | C 1.447652 -4.935034 -0.064238  |
|  |    | C 0.730930 -3.681441 -0.023602  |
|  |    | C 1.464337 -2.481603 0.018690   |
|  |    | C 0.747094 -1.207250 -0.084728  |
|  |    | C -0.745934 -1.207856 -0.084859 |
|  |    | C -1.462090 -2.482888 0.018358  |
|  |    | C -0.727611 -3.682073 -0.023855 |
|  |    | C 1.422070 0.037978 0.370475    |
|  |    | C 0.700573 1.305957 0.156312    |
|  |    | C -0.701744 1.305327 0.156496   |
|  |    | C -1.422054 0.036668 0.370489   |
|  |    | C -1.435892 2.515112 0.082409   |
|  |    | C -0.718090 3.746557 -0.009037  |
|  |    | C 0.714691 3.747185 -0.009245   |
|  |    | C 1.433617 2.516403 0.082043    |
|  |    | C 2.882721 2.504408 0.051653    |
|  |    | C 3.585302 3.760700 -0.092646   |
|  |    | C 2.853069 4.960545 -0.155849   |
|  |    | C 1.438590 4.990511 -0.115934   |
|  |    | C -1.443130 4.989240 -0.115429  |
|  |    | C -0.694418 6.206640 -0.201115  |
|  |    | C 0.688778 6.207235 -0.201363   |
|  |    | C 2.924974 0.023291 0.347291    |
|  |    | C 3.614113 1.298805 0.103499    |
|  |    | C 5.035821 1.272666 -0.070013   |
|  |    | C 5.715787 2.538129 -0.192876   |
|  |    | C 5.021764 3.726189 -0.188763   |
|  |    | C -2.924998 0.020570 0.347401   |
|  |    | C -3.615301 1.295529 0.104027   |
|  |    | C -2.885005 2.501809 0.052326   |
|  |    | C -3.588732 3.757511 -0.091506  |
|  |    | C -2.857596 4.958022 -0.154798  |

|  |      |                                 |
|--|------|---------------------------------|
|  |      | C -2.889541 -2.465843 0.019393  |
|  |      | C -3.617020 -1.245346 0.048000  |
|  |      | C -5.029587 -1.221053 -0.101244 |
|  |      | C -5.712876 0.027770 -0.123346  |
|  |      | C -5.037012 1.268172 -0.069329  |
|  |      | C -5.718148 2.533073 -0.191480  |
|  |      | C -5.025209 3.721761 -0.187143  |
|  |      | C -1.443212 -4.936305 -0.064912 |
|  |      | C -2.856830 -4.920415 -0.104706 |
|  |      | C -3.597805 -3.723493 -0.081266 |
|  |      | C -5.032660 -3.681139 -0.183143 |
|  |      | C -5.715800 -2.485720 -0.214527 |
|  |      | C 0.692873 -6.155865 -0.092705  |
|  |      | C -0.687343 -6.156461 -0.093077 |
|  |      | C 5.712827 0.032862 -0.123459   |
|  |      | O -2.141779 -0.050747 1.605783  |
|  |      | O 0.000552 -1.019427 -1.316727  |
|  |      | O 2.141876 -0.048435 1.605781   |
|  |      | H -6.814484 2.530939 -0.294846  |
|  |      | H -6.809297 0.026783 -0.228694  |
|  |      | H -6.812222 -2.478752 -0.316868 |
|  |      | H -5.581133 -4.633357 -0.254725 |
|  |      | H -5.565431 4.676777 -0.280909  |
|  |      | H -3.405262 5.908832 -0.256624  |
|  |      | H -3.395406 -5.879310 -0.173518 |
|  |      | H -1.245229 7.157196 -0.277405  |
|  |      | H -1.236911 -7.110363 -0.121470 |
|  |      | H 6.812090 2.536960 -0.296579   |
|  |      | H 6.809254 0.032842 -0.228798   |
|  |      | H 6.814554 -2.472783 -0.315212  |
|  |      | H 5.585405 -4.628473 -0.252351  |
|  |      | H 5.561102 4.681657 -0.283054   |
|  |      | H 3.399843 5.911833 -0.257986   |
|  |      | H 3.400712 -5.876343 -0.171748  |
|  |      | H 1.238742 7.158269 -0.277883   |
|  |      | H 1.243287 -7.109282 -0.120785  |
|  | SC1' | C 4.747792 -3.895052 -0.030400  |
|  |      | C 4.406338 -2.499269 -0.158313  |
|  |      | C 3.033340 -2.161058 -0.289278  |
|  |      | C 2.021487 -3.150564 -0.217829  |
|  |      | C 2.381433 -4.543308 -0.103341  |
|  |      | C 3.779736 -4.873683 -0.027692  |
|  |      | C 0.641703 -2.798922 -0.183745  |
|  |      | C 0.280701 -1.377906 -0.086098  |
|  |      | C 1.241128 -0.353441 -0.591650  |
|  |      | C 2.683822 -0.759352 -0.604830  |
|  |      | C -1.157947 -0.991351 -0.037630 |
|  |      | C -2.184402 -2.037701 -0.086598 |
|  |      | C -1.785919 -3.381002 -0.046840 |
|  |      | C -0.378092 -3.763177 -0.093046 |
|  |      | C -3.553173 -1.651156 -0.035957 |
|  |      | C -3.941769 -0.284652 -0.061172 |

|  |  |   |           |           |           |
|--|--|---|-----------|-----------|-----------|
|  |  | C | -2.956375 | 0.758400  | -0.412022 |
|  |  | C | -1.502647 | 0.385159  | -0.490941 |
|  |  | C | -3.286569 | 2.170520  | -0.151910 |
|  |  | C | -4.658915 | 2.508969  | 0.080267  |
|  |  | C | -5.626885 | 1.482530  | 0.176219  |
|  |  | C | -5.286084 | 0.105612  | 0.143548  |
|  |  | C | -4.555222 | -2.676471 | 0.114914  |
|  |  | C | -5.920439 | -2.260878 | 0.268350  |
|  |  | C | -6.265373 | -0.934789 | 0.303836  |
|  |  | C | -0.469749 | 1.427659  | -0.320064 |
|  |  | C | -0.864010 | 2.781618  | -0.224727 |
|  |  | C | -2.266038 | 3.144857  | -0.137389 |
|  |  | C | -2.614484 | 4.539147  | 0.027470  |
|  |  | C | -4.006650 | 4.875342  | 0.179685  |
|  |  | C | -4.983461 | 3.906752  | 0.220086  |
|  |  | C | -2.798232 | -4.402247 | 0.044974  |
|  |  | C | -4.151921 | -4.019299 | 0.134416  |
|  |  | C | 0.879708  | 1.064083  | -0.369338 |
|  |  | C | -0.012680 | -5.158934 | -0.042977 |
|  |  | C | -1.059670 | -6.137251 | 0.033180  |
|  |  | C | -2.390153 | -5.773257 | 0.074825  |
|  |  | C | 1.357608  | -5.507369 | -0.038187 |
|  |  | C | 0.150413  | 3.785409  | -0.164915 |
|  |  | C | 1.533386  | 3.415957  | -0.216030 |
|  |  | C | 1.904569  | 2.042135  | -0.328427 |
|  |  | C | 3.301985  | 1.652627  | -0.339399 |
|  |  | C | 3.690444  | 0.296886  | -0.389772 |
|  |  | C | 5.058138  | -0.096427 | -0.233391 |
|  |  | C | 5.388621  | -1.468889 | -0.166644 |
|  |  | C | -1.595509 | 5.508986  | 0.056651  |
|  |  | C | -0.223756 | 5.172923  | -0.035947 |
|  |  | C | 0.817317  | 6.154288  | 0.019152  |
|  |  | C | 2.152859  | 5.797216  | -0.026992 |
|  |  | C | 2.558524  | 4.428349  | -0.134008 |
|  |  | C | 3.917385  | 4.031864  | -0.134035 |
|  |  | C | 4.310974  | 2.683069  | -0.213560 |
|  |  | C | 5.690140  | 2.275357  | -0.141523 |
|  |  | C | 6.047809  | 0.946950  | -0.135176 |
|  |  | O | -2.268956 | 0.481250  | -1.700456 |
|  |  | O | -0.345721 | -0.991603 | 1.174060  |
|  |  | O | 1.876806  | -0.638783 | -1.847717 |
|  |  | N | 2.450545  | -0.278021 | 2.538856  |
|  |  | N | 2.921013  | 0.991420  | 3.019815  |
|  |  | H | 7.106634  | 0.658836  | -0.043746 |
|  |  | H | 6.448732  | -1.752527 | -0.071076 |
|  |  | H | 5.811019  | -4.168463 | 0.055909  |
|  |  | H | 4.064690  | -5.934272 | 0.053814  |
|  |  | H | 6.461787  | 3.056864  | -0.062509 |
|  |  | H | 4.695022  | 4.807598  | -0.046535 |
|  |  | H | 1.632327  | -6.571784 | 0.039881  |
|  |  | H | 2.932573  | 6.572846  | 0.028832  |
|  |  | H | -0.778481 | -7.201481 | 0.066340  |

|  |     |                                 |
|--|-----|---------------------------------|
|  |     | H -6.037670 4.188995 0.367278   |
|  |     | H -6.682086 1.758784 0.327701   |
|  |     | H -7.309369 -0.643646 0.446888  |
|  |     | H -6.695083 -3.035631 0.377269  |
|  |     | H -4.277111 5.937356 0.288165   |
|  |     | H -1.873593 6.568717 0.174799   |
|  |     | H -4.917601 -4.804337 0.242601  |
|  |     | H 0.534067 7.214520 0.111167    |
|  |     | H -3.171241 -6.546704 0.140734  |
|  |     | H 1.436268 -0.288068 2.390863   |
|  |     | H 2.670916 -0.979486 3.246526   |
|  |     | H 2.175539 1.510417 3.494389    |
|  |     | H 3.187312 1.539202 2.198241    |
|  | ts3 | C 4.953074 -3.612937 0.090565   |
|  |     | C 4.535425 -2.241601 -0.069510  |
|  |     | C 3.143899 -1.976712 -0.186299  |
|  |     | C 2.182400 -3.020271 -0.108441  |
|  |     | C 2.625683 -4.390638 0.011554   |
|  |     | C 4.038904 -4.641056 0.108077   |
|  |     | C 0.791670 -2.738921 -0.126685  |
|  |     | C 0.330596 -1.319056 0.047172   |
|  |     | C 1.259258 -0.296152 -0.586860  |
|  |     | C 2.715221 -0.612247 -0.563649  |
|  |     | C -1.095609 -1.087755 -0.316786 |
|  |     | C -2.031311 -2.120970 -0.246191 |
|  |     | C -1.575558 -3.474615 -0.133427 |
|  |     | C -0.162251 -3.774582 -0.109920 |
|  |     | C -3.445219 -1.822568 -0.170431 |
|  |     | C -3.912423 -0.496215 -0.152249 |
|  |     | C -2.999067 0.609408 -0.483961  |
|  |     | C -1.499288 0.288944 -0.592777  |
|  |     | C -3.386730 1.984930 -0.129463  |
|  |     | C -4.759251 2.239989 0.173156   |
|  |     | C -5.679216 1.159028 0.246770   |
|  |     | C -5.276131 -0.183638 0.128483  |
|  |     | C -4.380906 -2.905973 0.008683  |
|  |     | C -5.767923 -2.579492 0.194790  |
|  |     | C -6.191807 -1.280501 0.275233  |
|  |     | C -0.537348 1.394762 -0.389717  |
|  |     | C -1.006047 2.727558 -0.258444  |
|  |     | C -2.419095 3.015373 -0.120686  |
|  |     | C -2.838131 4.378867 0.106508   |
|  |     | C -4.234082 4.632240 0.337145   |
|  |     | C -5.152593 3.606895 0.390056   |
|  |     | C -2.525549 -4.531813 -0.035840 |
|  |     | C -3.907585 -4.219573 0.033103  |
|  |     | C 0.828256 1.111980 -0.420307   |
|  |     | C 0.280902 -5.147732 -0.029142  |
|  |     | C -0.710384 -6.182443 0.020408  |
|  |     | C -2.056519 -5.884283 0.024774  |
|  |     | C 1.665192 -5.417365 0.042953   |
|  |     | C -0.048457 3.786223 -0.186740  |

|  |      |                                |
|--|------|--------------------------------|
|  |      | C 1.352539 3.498276 -0.252715  |
|  |      | C 1.797443 2.146804 -0.367681  |
|  |      | C 3.212340 1.834832 -0.357524  |
|  |      | C 3.669016 0.498800 -0.380146  |
|  |      | C 5.057699 0.185071 -0.227817  |
|  |      | C 5.463275 -1.164799 -0.131309 |
|  |      | C -1.873970 5.407831 0.123175  |
|  |      | C -0.494706 5.149994 -0.020365 |
|  |      | C 0.491919 6.190199 0.027417   |
|  |      | C 1.841939 5.911197 -0.046471  |
|  |      | C 2.321838 4.565382 -0.168443  |
|  |      | C 3.697852 4.245134 -0.175531  |
|  |      | C 4.163045 2.916758 -0.244734  |
|  |      | C 5.563048 2.587294 -0.178741  |
|  |      | C 5.991918 1.280517 -0.159336  |
|  |      | O -2.329941 0.459763 -1.770560 |
|  |      | O 0.190147 -1.001900 1.443512  |
|  |      | O 1.919595 -0.594263 -1.827447 |
|  |      | N 2.304145 -0.201889 2.424219  |
|  |      | N 2.263881 1.081292 2.910756   |
|  |      | H 7.065685 1.050087 -0.077347  |
|  |      | H 6.538373 -1.390179 -0.047361 |
|  |      | H 6.029764 -3.826181 0.180068  |
|  |      | H 4.380211 -5.683701 0.204869  |
|  |      | H 6.291303 3.411033 -0.117792  |
|  |      | H 4.432870 5.062099 -0.095220  |
|  |      | H 2.000539 -6.462841 0.137538  |
|  |      | H 2.578614 6.728134 0.004641   |
|  |      | H -0.374527 -7.229908 0.073943 |
|  |      | H -6.212020 3.822007 0.599851  |
|  |      | H -6.739311 1.377529 0.449560  |
|  |      | H -7.245956 -1.054295 0.456041 |
|  |      | H -6.488087 -3.404809 0.306441 |
|  |      | H -4.556575 5.672885 0.497798  |
|  |      | H -2.207350 6.446496 0.279295  |
|  |      | H -4.628730 -5.044762 0.148768 |
|  |      | H 0.148983 7.230823 0.138548   |
|  |      | H -2.802693 -6.691985 0.083658 |
|  |      | H 1.271926 -0.596705 1.902173  |
|  |      | H 2.526242 -0.828653 3.205977  |
|  |      | H 1.775805 1.231397 3.799297   |
|  |      | H 1.957172 1.734648 2.190283   |
|  | int3 | C 4.616385 -4.013949 0.030888  |
|  |      | C 4.310230 -2.610098 -0.072756 |
|  |      | C 2.950231 -2.234898 -0.108837 |
|  |      | C 1.899126 -3.190089 -0.044504 |
|  |      | C 2.229228 -4.594023 0.012218  |
|  |      | C 3.617741 -4.963471 0.056843  |
|  |      | C 0.532961 -2.797704 -0.044006 |
|  |      | C 0.179927 -1.355628 0.176088  |
|  |      | C 1.204155 -0.394721 -0.405623 |
|  |      | C 2.619811 -0.827894 -0.409438 |



|  |  |   |           |           |           |
|--|--|---|-----------|-----------|-----------|
|  |  | C | -1.202453 | -1.001067 | -0.251060 |
|  |  | C | -2.218092 | -1.951087 | -0.231095 |
|  |  | C | -1.885345 | -3.347855 | -0.106532 |
|  |  | C | -0.502263 | -3.754682 | -0.069845 |
|  |  | C | -3.611251 | -1.543476 | -0.197856 |
|  |  | C | -3.970545 | -0.184920 | -0.163422 |
|  |  | C | -2.976946 | 0.850099  | -0.471092 |
|  |  | C | -1.474372 | 0.391289  | -0.553702 |
|  |  | C | -3.245011 | 2.245512  | -0.100964 |
|  |  | C | -4.583578 | 2.606183  | 0.218317  |
|  |  | C | -5.593643 | 1.597290  | 0.278493  |
|  |  | C | -5.309652 | 0.235684  | 0.130242  |
|  |  | C | -4.635475 | -2.551812 | -0.037468 |
|  |  | C | -5.995642 | -2.112237 | 0.136027  |
|  |  | C | -6.313803 | -0.787247 | 0.243318  |
|  |  | C | -0.446375 | 1.430788  | -0.315841 |
|  |  | C | -0.813593 | 2.807093  | -0.216491 |
|  |  | C | -2.193575 | 3.204724  | -0.096872 |
|  |  | C | -2.507460 | 4.595273  | 0.123785  |
|  |  | C | -3.876712 | 4.952178  | 0.371273  |
|  |  | C | -4.868639 | 3.997620  | 0.443357  |
|  |  | C | -2.916069 | -4.317798 | -0.047312 |
|  |  | C | -4.274960 | -3.897385 | -0.010005 |
|  |  | C | 0.881198  | 1.046301  | -0.276736 |
|  |  | C | -0.170038 | -5.161431 | -0.026710 |
|  |  | C | -1.245210 | -6.114767 | -0.003134 |
|  |  | C | -2.560942 | -5.708979 | -0.002369 |
|  |  | C | 1.185916  | -5.542714 | 0.026625  |
|  |  | C | 0.223907  | 3.787506  | -0.153922 |
|  |  | C | 1.600887  | 3.391885  | -0.203400 |
|  |  | C | 1.941447  | 2.002592  | -0.246291 |
|  |  | C | 3.315032  | 1.586618  | -0.272193 |
|  |  | C | 3.664814  | 0.193336  | -0.174811 |
|  |  | C | 5.050968  | -0.242414 | -0.237347 |
|  |  | C | 5.338176  | -1.608149 | -0.174677 |
|  |  | C | -1.466398 | 5.552546  | 0.119915  |
|  |  | C | -0.115843 | 5.187036  | -0.025040 |
|  |  | C | 0.954775  | 6.149502  | -0.017661 |
|  |  | C | 2.273943  | 5.764961  | -0.105318 |
|  |  | C | 2.649212  | 4.377642  | -0.187130 |
|  |  | C | 3.993970  | 3.947658  | -0.231868 |
|  |  | C | 4.347897  | 2.580670  | -0.266764 |
|  |  | C | 5.724869  | 2.127397  | -0.277517 |
|  |  | C | 6.057540  | 0.792166  | -0.271251 |
|  |  | O | -2.278846 | 0.655230  | -1.720902 |
|  |  | O | 0.292300  | -1.065860 | 1.656065  |
|  |  | O | 1.822341  | -0.712627 | -1.665667 |
|  |  | N | 3.533856  | 0.070969  | 2.008166  |
|  |  | N | 2.417373  | 0.583111  | 2.475650  |
|  |  | H | 7.116460  | 0.489531  | -0.290413 |
|  |  | H | 6.390018  | -1.934855 | -0.178174 |
|  |  | H | 5.673082  | -4.321953 | 0.068128  |

|  |     |                                 |
|--|-----|---------------------------------|
|  |     | H 3.873225 -6.033485 0.109812   |
|  |     | H 6.519393 2.890052 -0.294678   |
|  |     | H 4.794777 4.704700 -0.225156   |
|  |     | H 1.437496 -6.614336 0.082604   |
|  |     | H 3.072287 6.523678 -0.099267   |
|  |     | H -0.994630 -7.186820 0.027986  |
|  |     | H -5.905640 4.292309 0.668025   |
|  |     | H -6.631785 1.902806 0.483764   |
|  |     | H -7.347441 -0.479475 0.422117  |
|  |     | H -6.781300 -2.878429 0.225737  |
|  |     | H -4.119427 6.014409 0.530848   |
|  |     | H -1.720733 6.615450 0.259498   |
|  |     | H -5.062349 -4.662311 0.082366  |
|  |     | H 0.694804 7.216516 0.064107    |
|  |     | H -3.371735 -6.453245 0.031767  |
|  |     | H -0.409637 -1.589150 2.083333  |
|  |     | H 4.257304 0.805276 2.043465    |
|  |     | H 2.236710 1.592850 2.428009    |
|  |     | H 1.591396 -0.032345 2.382265   |
|  | ts4 | C 4.568809 -4.066930 0.064628   |
|  |     | C 4.284813 -2.662928 -0.084070  |
|  |     | C 2.924074 -2.268619 -0.173647  |
|  |     | C 1.865563 -3.202896 -0.090184  |
|  |     | C 2.173685 -4.607645 0.029329   |
|  |     | C 3.555367 -4.998604 0.103692   |
|  |     | C 0.494377 -2.790800 -0.110536  |
|  |     | C 0.158664 -1.372308 -0.026980  |
|  |     | C 1.203078 -0.412683 -0.521127  |
|  |     | C 2.622128 -0.863662 -0.511341  |
|  |     | C -1.203889 -0.996743 -0.324146 |
|  |     | C -2.239893 -1.933031 -0.257057 |
|  |     | C -1.925619 -3.324881 -0.117626 |
|  |     | C -0.553844 -3.744876 -0.081978 |
|  |     | C -3.622845 -1.506739 -0.193899 |
|  |     | C -3.962781 -0.141671 -0.165514 |
|  |     | C -2.953684 0.880564 -0.482991  |
|  |     | C -1.476625 0.411551 -0.600798  |
|  |     | C -3.207227 2.280820 -0.108349  |
|  |     | C -4.544359 2.659910 0.206953   |
|  |     | C -5.561549 1.665224 0.270544   |
|  |     | C -5.291994 0.295661 0.130110   |
|  |     | C -4.659311 -2.497198 -0.011817 |
|  |     | C -6.010042 -2.040180 0.170659  |
|  |     | C -6.309465 -0.708885 0.263525  |
|  |     | C -0.427532 1.430647 -0.365237  |
|  |     | C -0.771247 2.806620 -0.234929  |
|  |     | C -2.147824 3.223510 -0.101810  |
|  |     | C -2.442222 4.617791 0.130941   |
|  |     | C -3.807631 4.994375 0.372414   |
|  |     | C -4.813265 4.054674 0.432401   |
|  |     | C -2.971594 -4.287086 -0.018402 |
|  |     | C -4.318691 -3.851060 0.027558  |

|  |    |   |           |           |           |
|--|----|---|-----------|-----------|-----------|
|  |    | C | 0.900615  | 1.027386  | -0.357655 |
|  |    | C | -0.234683 | -5.149996 | 0.011812  |
|  |    | C | -1.315245 | -6.092840 | 0.071923  |
|  |    | C | -2.629333 | -5.676441 | 0.064175  |
|  |    | C | 1.119349  | -5.541506 | 0.075813  |
|  |    | C | 0.279446  | 3.772910  | -0.156325 |
|  |    | C | 1.650426  | 3.359532  | -0.214153 |
|  |    | C | 1.970555  | 1.969031  | -0.304116 |
|  |    | C | 3.345327  | 1.534357  | -0.318925 |
|  |    | C | 3.678043  | 0.147587  | -0.293971 |
|  |    | C | 5.045484  | -0.303652 | -0.231288 |
|  |    | C | 5.319315  | -1.681173 | -0.155166 |
|  |    | C | -1.388786 | 5.557330  | 0.144404  |
|  |    | C | -0.041510 | 5.173652  | 0.000959  |
|  |    | C | 1.039012  | 6.120775  | 0.038113  |
|  |    | C | 2.355166  | 5.720325  | -0.042577 |
|  |    | C | 2.712007  | 4.332916  | -0.154345 |
|  |    | C | 4.052257  | 3.888663  | -0.178266 |
|  |    | C | 4.391491  | 2.520647  | -0.242046 |
|  |    | C | 5.757567  | 2.052932  | -0.198649 |
|  |    | C | 6.069271  | 0.711618  | -0.189488 |
|  |    | O | -2.292645 | 0.693586  | -1.760526 |
|  |    | O | 0.289872  | -0.937813 | 1.736145  |
|  |    | O | 1.851583  | -0.725075 | -1.775149 |
|  |    | N | 3.395984  | 0.067596  | 2.148760  |
|  |    | N | 2.247945  | 0.548043  | 2.456999  |
|  |    | H | 7.122027  | 0.391119  | -0.144341 |
|  |    | H | 6.367727  | -2.013851 | -0.100839 |
|  |    | H | 5.620017  | -4.387686 | 0.133990  |
|  |    | H | 3.791219  | -6.070270 | 0.197867  |
|  |    | H | 6.562018  | 2.804320  | -0.160206 |
|  |    | H | 4.860878  | 4.635332  | -0.123759 |
|  |    | H | 1.359675  | -6.613090 | 0.170404  |
|  |    | H | 3.163401  | 6.467646  | -0.007058 |
|  |    | H | -1.072825 | -7.165091 | 0.139405  |
|  |    | H | -5.847667 | 4.362154  | 0.651746  |
|  |    | H | -6.596169 | 1.981090  | 0.478313  |
|  |    | H | -7.336789 | -0.384174 | 0.448486  |
|  |    | H | -6.804567 | -2.794795 | 0.278025  |
|  |    | H | -4.034641 | 6.059264  | 0.537103  |
|  |    | H | -1.626833 | 6.621948  | 0.298787  |
|  |    | H | -5.116604 | -4.602086 | 0.140752  |
|  |    | H | 0.792184  | 7.188986  | 0.141790  |
|  |    | H | -3.445637 | -6.412711 | 0.127763  |
|  |    | H | 0.158536  | -1.806393 | 2.158270  |
|  |    | H | 4.092873  | 0.832167  | 2.112369  |
|  |    | H | 2.090272  | 1.567114  | 2.455718  |
|  |    | H | 1.383712  | -0.131920 | 2.278057  |
|  | 2E | C | -5.679972 | 2.515138  | -0.388605 |
|  |    | C | -5.006927 | 1.255756  | -0.209659 |
|  |    | C | -3.601792 | 1.278941  | 0.053991  |
|  |    | C | -2.868088 | 2.483287  | 0.038971  |

|  |  |   |           |           |           |
|--|--|---|-----------|-----------|-----------|
|  |  | C | -3.562249 | 3.735133  | -0.167841 |
|  |  | C | -4.987754 | 3.703809  | -0.350164 |
|  |  | C | -2.932894 | 0.007173  | 0.396400  |
|  |  | C | -1.414768 | 0.004355  | 0.542711  |
|  |  | C | -0.692598 | 1.275116  | 0.305008  |
|  |  | C | -1.423112 | 2.487278  | 0.148696  |
|  |  | C | -3.607353 | -1.261072 | 0.051959  |
|  |  | C | -2.882835 | -2.465449 | 0.035895  |
|  |  | C | -1.440527 | -2.477184 | 0.146350  |
|  |  | C | -0.701567 | -1.270449 | 0.302822  |
|  |  | C | -3.581556 | -3.710818 | -0.170686 |
|  |  | C | -5.006748 | -3.674061 | -0.353057 |
|  |  | C | -5.693569 | -2.483186 | -0.391362 |
|  |  | C | -5.012927 | -1.228703 | -0.211615 |
|  |  | C | -5.685468 | 0.015060  | -0.290385 |
|  |  | C | -0.726075 | -3.706236 | 0.027413  |
|  |  | C | -1.448193 | -4.946381 | -0.132341 |
|  |  | C | -2.855405 | -4.914388 | -0.218080 |
|  |  | C | 0.704678  | -3.706581 | 0.028888  |
|  |  | C | 1.421763  | -2.483278 | 0.148024  |
|  |  | C | 0.694506  | -1.274937 | 0.304696  |
|  |  | C | 1.414221  | -0.004967 | 0.541400  |
|  |  | C | 0.703683  | 1.270784  | 0.305995  |
|  |  | C | 2.932562  | -0.009752 | 0.398422  |
|  |  | C | 3.598343  | -1.280551 | 0.054096  |
|  |  | C | 2.862836  | -2.481909 | 0.040449  |
|  |  | C | 3.554904  | -3.729061 | -0.166919 |
|  |  | C | 2.824645  | -4.923703 | -0.214161 |
|  |  | C | 1.421402  | -4.946808 | -0.129545 |
|  |  | C | 0.678478  | -6.161012 | -0.234855 |
|  |  | C | -0.701453 | -6.163208 | -0.236626 |
|  |  | C | 4.976631  | -3.697181 | -0.348372 |
|  |  | C | 5.665142  | -2.514331 | -0.388097 |
|  |  | C | 4.997710  | -1.258349 | -0.210774 |
|  |  | C | 5.681341  | -0.027538 | -0.291741 |
|  |  | C | 5.014648  | 1.219627  | -0.212159 |
|  |  | C | 3.610759  | 1.254928  | 0.054931  |
|  |  | C | 2.884865  | 2.463141  | 0.039186  |
|  |  | C | 1.439913  | 2.474939  | 0.149377  |
|  |  | C | 3.587738  | 3.709563  | -0.170455 |
|  |  | C | 5.012627  | 3.667381  | -0.355688 |
|  |  | C | 5.696430  | 2.473647  | -0.394696 |
|  |  | C | -0.702747 | 3.713126  | 0.029554  |
|  |  | C | 0.728005  | 3.706811  | 0.029438  |
|  |  | C | 1.454176  | 4.945882  | -0.130554 |
|  |  | C | 2.861757  | 4.913969  | -0.217993 |
|  |  | C | 0.711604  | 6.166503  | -0.235446 |
|  |  | C | -0.668512 | 6.172166  | -0.234963 |
|  |  | C | -1.420043 | 4.957206  | -0.129788 |
|  |  | C | -2.827972 | 4.934626  | -0.215380 |
|  |  | O | -2.280060 | 0.006022  | 1.707525  |
|  |  | O | 2.277391  | -0.008356 | 1.707871  |

|          |     |                                 |
|----------|-----|---------------------------------|
|          |     | H -6.767334 2.509794 -0.562458  |
|          |     | H -6.771861 0.017469 -0.472196  |
|          |     | H -6.780818 -2.471890 -0.565213 |
|          |     | H -5.540200 -4.627516 -0.490695 |
|          |     | H -5.517677 4.659276 -0.487496  |
|          |     | H -3.367345 5.884611 -0.359082  |
|          |     | H -3.400819 -5.860941 -0.362105 |
|          |     | H -1.218006 7.120984 -0.337128  |
|          |     | H -1.254198 -7.110055 -0.339662 |
|          |     | H 6.783277 2.460535 -0.571037   |
|          |     | H 6.767252 -0.039192 -0.474809  |
|          |     | H 6.744539 -2.508393 -0.560783  |
|          |     | H 5.507108 -4.652125 -0.485068  |
|          |     | H 5.549103 4.618823 -0.495413   |
|          |     | H 3.407131 5.860260 -0.363207   |
|          |     | H 3.364109 -5.873474 -0.358376  |
|          |     | H 1.268692 7.110844 -0.338006   |
|          |     | H 1.234811 -7.105854 -0.336415  |
| Route 1B | ts1 | C 0.819482 1.132828 0.365098    |
|          |     | O 0.606973 1.219488 1.751854    |
|          |     | C -0.606947 1.419556 0.015019   |
|          |     | C -1.068848 2.724959 -0.107497  |
|          |     | C -2.492053 2.991774 -0.109302  |
|          |     | C -2.940959 4.366985 -0.092090  |
|          |     | C -1.991116 5.396604 -0.167240  |
|          |     | C -0.588050 5.144050 -0.229958  |
|          |     | C -0.120136 3.798245 -0.170033  |
|          |     | C 1.298869 3.526551 -0.201882   |
|          |     | C 2.241806 4.611910 -0.335172   |
|          |     | C 1.730595 5.949790 -0.405086   |
|          |     | C 0.374458 6.205778 -0.345552   |
|          |     | C 1.779946 2.203803 -0.095158   |
|          |     | C -1.511529 0.287922 -0.158083  |
|          |     | C -2.999062 0.562091 -0.263192  |
|          |     | C -3.436802 1.950243 -0.082238  |
|          |     | C -4.843337 2.202201 0.054787   |
|          |     | C -5.265875 3.582453 0.090722   |
|          |     | C -4.359646 4.613579 0.002232   |
|          |     | C -1.115073 -1.098316 0.231170  |
|          |     | C 0.350531 -1.395293 0.221373   |
|          |     | C 1.235048 -0.250581 -0.136421  |
|          |     | C 2.671691 -0.537144 -0.368472  |
|          |     | C 3.636373 0.559998 -0.197101   |
|          |     | C 3.162667 1.912675 -0.200361   |
|          |     | C 4.110825 3.001678 -0.309759   |
|          |     | C 3.625652 4.320366 -0.365754   |
|          |     | C 0.798783 -2.751740 -0.094964  |
|          |     | C 2.197179 -2.996252 -0.237197  |
|          |     | C 3.140993 -1.928260 -0.266765  |
|          |     | C 4.541736 -2.181751 -0.304819  |
|          |     | C 5.454162 -1.088781 -0.334613  |
|          |     | C 5.033739 0.260602 -0.281771   |

|  |      |   |           |           |           |
|--|------|---|-----------|-----------|-----------|
|  |      | C | 5.956483  | 1.371367  | -0.324133 |
|  |      | C | 5.514248  | 2.675535  | -0.352482 |
|  |      | C | -2.067878 | -2.185260 | -0.026927 |
|  |      | C | -1.583314 | -3.504538 | -0.096797 |
|  |      | C | -0.153109 | -3.787185 | -0.143195 |
|  |      | C | 0.306224  | -5.149243 | -0.275879 |
|  |      | C | 1.695946  | -5.401566 | -0.337880 |
|  |      | C | 2.653357  | -4.366471 | -0.323194 |
|  |      | C | 4.072340  | -4.599120 | -0.374211 |
|  |      | C | 4.974891  | -3.559397 | -0.346989 |
|  |      | C | -2.532155 | -4.591663 | -0.157879 |
|  |      | C | -2.027042 | -5.932387 | -0.264102 |
|  |      | C | -0.675432 | -6.198704 | -0.324192 |
|  |      | C | -3.463071 | -1.885730 | -0.037840 |
|  |      | C | -4.405729 | -2.981587 | -0.023563 |
|  |      | C | -3.915110 | -4.301299 | -0.093323 |
|  |      | C | -3.936718 | -0.544208 | -0.017556 |
|  |      | C | -5.316979 | -0.241693 | 0.105797  |
|  |      | C | -6.238084 | -1.351707 | 0.165968  |
|  |      | C | -5.804314 | -2.657317 | 0.080282  |
|  |      | C | -5.744708 | 1.120576  | 0.122609  |
|  |      | O | 1.695769  | -0.314693 | -1.486822 |
|  |      | O | -0.379352 | -1.263865 | 1.463697  |
|  |      | O | -2.156346 | 0.329623  | -1.447991 |
|  |      | N | 3.464605  | -0.127799 | 2.410266  |
|  |      | N | 2.257738  | -0.101945 | 3.095362  |
|  |      | H | 7.035194  | 1.152667  | -0.366413 |
|  |      | H | 6.532209  | -1.305280 | -0.405616 |
|  |      | H | 6.056049  | -3.764909 | -0.382542 |
|  |      | H | 4.430639  | -5.638881 | -0.434032 |
|  |      | H | 6.240744  | 3.501109  | -0.414520 |
|  |      | H | 4.344655  | 5.153647  | -0.439974 |
|  |      | H | 2.042691  | -6.445441 | -0.404139 |
|  |      | H | 2.445224  | 6.782158  | -0.500759 |
|  |      | H | -0.321747 | -7.238315 | -0.413939 |
|  |      | H | -6.342206 | 3.799179  | 0.181028  |
|  |      | H | -6.822483 | 1.331373  | 0.201236  |
|  |      | H | -7.313636 | -1.134161 | 0.260552  |
|  |      | H | -6.533210 | -3.482639 | 0.100842  |
|  |      | H | -4.706883 | 5.658098  | 0.012961  |
|  |      | H | -2.339140 | 6.442344  | -0.174412 |
|  |      | H | -4.632891 | -5.137434 | -0.094784 |
|  |      | H | 0.006124  | 7.243104  | -0.393844 |
|  |      | H | -2.751446 | -6.761000 | -0.304403 |
|  |      | H | 1.543765  | 0.591931  | 2.567694  |
|  |      | H | 1.823112  | -1.028494 | 2.997747  |
|  |      | H | 4.081575  | 0.628204  | 2.703827  |
|  |      | H | 3.939163  | -1.031647 | 2.404961  |
|  | int1 | C | 0.800985  | 1.133196  | 0.487383  |
|  |      | O | 0.819680  | 1.213925  | 1.923081  |
|  |      | C | -0.618991 | 1.410989  | 0.055574  |
|  |      | C | -1.076482 | 2.710129  | -0.089215 |

|  |  |   |           |           |           |
|--|--|---|-----------|-----------|-----------|
|  |  | C | -2.502532 | 2.987211  | -0.160421 |
|  |  | C | -2.950660 | 4.364972  | -0.112394 |
|  |  | C | -2.005965 | 5.397120  | -0.119630 |
|  |  | C | -0.602461 | 5.144911  | -0.137481 |
|  |  | C | -0.132822 | 3.802592  | -0.084942 |
|  |  | C | 1.278275  | 3.532038  | -0.104209 |
|  |  | C | 2.220854  | 4.616279  | -0.228475 |
|  |  | C | 1.713949  | 5.958876  | -0.263956 |
|  |  | C | 0.359736  | 6.212281  | -0.208897 |
|  |  | C | 1.756635  | 2.202246  | -0.006172 |
|  |  | C | -1.504190 | 0.298320  | -0.222842 |
|  |  | C | -3.028805 | 0.568241  | -0.350535 |
|  |  | C | -3.454896 | 1.953273  | -0.158419 |
|  |  | C | -4.862974 | 2.210228  | -0.000297 |
|  |  | C | -5.282913 | 3.590915  | 0.039974  |
|  |  | C | -4.370502 | 4.615328  | -0.036980 |
|  |  | C | -1.144769 | -1.083053 | 0.205655  |
|  |  | C | 0.315624  | -1.384014 | 0.281991  |
|  |  | C | 1.210529  | -0.240428 | -0.051632 |
|  |  | C | 2.634518  | -0.531703 | -0.358484 |
|  |  | C | 3.617268  | 0.552318  | -0.193525 |
|  |  | C | 3.133284  | 1.910580  | -0.155374 |
|  |  | C | 4.077495  | 2.997344  | -0.293665 |
|  |  | C | 3.602436  | 4.320658  | -0.298331 |
|  |  | C | 0.771286  | -2.745462 | -0.015627 |
|  |  | C | 2.163087  | -2.992161 | -0.204801 |
|  |  | C | 3.109317  | -1.925642 | -0.293110 |
|  |  | C | 4.502147  | -2.180071 | -0.406522 |
|  |  | C | 5.427931  | -1.086989 | -0.486274 |
|  |  | C | 5.010790  | 0.257036  | -0.412522 |
|  |  | C | 5.925245  | 1.372092  | -0.484456 |
|  |  | C | 5.477368  | 2.672310  | -0.431536 |
|  |  | C | -2.093793 | -2.175529 | -0.038682 |
|  |  | C | -1.611538 | -3.498477 | -0.050749 |
|  |  | C | -0.182470 | -3.782814 | -0.067755 |
|  |  | C | 0.273973  | -5.146358 | -0.191962 |
|  |  | C | 1.659097  | -5.400172 | -0.280834 |
|  |  | C | 2.614327  | -4.361131 | -0.307179 |
|  |  | C | 4.027803  | -4.595861 | -0.427658 |
|  |  | C | 4.931971  | -3.556281 | -0.459546 |
|  |  | C | -2.561102 | -4.585287 | -0.087893 |
|  |  | C | -2.057323 | -5.933323 | -0.156230 |
|  |  | C | -0.708393 | -6.200275 | -0.215392 |
|  |  | C | -3.486467 | -1.878829 | -0.067114 |
|  |  | C | -4.430233 | -2.969754 | -0.007903 |
|  |  | C | -3.940893 | -4.294124 | -0.037776 |
|  |  | C | -3.958056 | -0.532909 | -0.074586 |
|  |  | C | -5.334110 | -0.231327 | 0.079604  |
|  |  | C | -6.255873 | -1.335873 | 0.179579  |
|  |  | C | -5.825947 | -2.644134 | 0.109667  |
|  |  | C | -5.761852 | 1.133309  | 0.086634  |
|  |  | O | 1.619215  | -0.273363 | -1.421741 |

|  |     |                                 |
|--|-----|---------------------------------|
|  |     | O -0.469167 -1.196480 1.481349  |
|  |     | O -2.165606 0.334110 -1.494837  |
|  |     | N 3.859981 -0.154766 2.124930   |
|  |     | N 2.801906 -0.390327 2.868641   |
|  |     | H 6.998852 1.160743 -0.608563   |
|  |     | H 6.497436 -1.309797 -0.622978  |
|  |     | H 6.009317 -3.764951 -0.551775  |
|  |     | H 4.381838 -5.636319 -0.498243  |
|  |     | H 6.195885 3.503119 -0.514212   |
|  |     | H 4.323291 5.149965 -0.381074   |
|  |     | H 2.005916 -6.443857 -0.349150  |
|  |     | H 2.431413 6.791197 -0.336387   |
|  |     | H -0.354487 -7.240678 -0.286863 |
|  |     | H -6.358352 3.809490 0.130254   |
|  |     | H -6.838488 1.345806 0.181352   |
|  |     | H -7.328471 -1.113697 0.293127  |
|  |     | H -6.554647 -3.468193 0.160674  |
|  |     | H -4.711501 5.662216 -0.013552  |
|  |     | H -2.354897 6.442229 -0.109099  |
|  |     | H -4.660089 -5.128587 -0.012635 |
|  |     | H -0.010082 7.249238 -0.235396  |
|  |     | H -2.784056 -6.760599 -0.174832 |
|  |     | H 1.567297 0.656403 2.304365    |
|  |     | H 2.484194 -1.346484 2.647064   |
|  |     | H 4.334990 0.729848 2.302889    |
|  |     | H 4.444950 -0.893835 1.712732   |
|  | ts2 | C 0.714636 1.208982 0.442182    |
|  |     | O 0.861217 1.295344 1.885617    |
|  |     | C -0.734525 1.366793 0.045847   |
|  |     | C -1.306110 2.622169 -0.094024  |
|  |     | C -2.751353 2.774740 -0.142026  |
|  |     | C -3.317281 4.108469 -0.087961  |
|  |     | C -2.466077 5.218455 -0.120092  |
|  |     | C -1.046403 5.087978 -0.164030  |
|  |     | C -0.462066 3.791925 -0.110936  |
|  |     | C 0.967721 3.643072 -0.143646   |
|  |     | C 1.813386 4.806303 -0.266964   |
|  |     | C 1.190005 6.098744 -0.317685   |
|  |     | C -0.180867 6.234038 -0.258476  |
|  |     | C 1.560001 2.363688 -0.044522   |
|  |     | C -1.525526 0.186921 -0.237546  |
|  |     | C -3.068542 0.321608 -0.336621  |
|  |     | C -3.610605 1.662407 -0.126574  |
|  |     | C -5.032408 1.794474 0.058525   |
|  |     | C -5.569663 3.133675 0.113162   |
|  |     | C -4.751672 4.233729 0.018360   |
|  |     | C -1.037083 -1.160017 0.167287  |
|  |     | C 0.441270 -1.332158 0.208395   |
|  |     | C 1.237587 -0.117032 -0.118206  |
|  |     | C 2.685373 -0.281366 -0.383374  |
|  |     | C 3.557978 0.883399 -0.175228   |
|  |     | C 2.961655 2.192164 -0.152293   |



|  |  |   |           |           |           |
|--|--|---|-----------|-----------|-----------|
|  |  | C | 3.808976  | 3.358220  | -0.263761 |
|  |  | C | 3.216257  | 4.633676  | -0.303966 |
|  |  | C | 1.014618  | -2.648418 | -0.083995 |
|  |  | C | 2.425487  | -2.772901 | -0.252855 |
|  |  | C | 3.277720  | -1.628442 | -0.313026 |
|  |  | C | 4.691927  | -1.761383 | -0.356776 |
|  |  | C | 5.520555  | -0.593560 | -0.356461 |
|  |  | C | 4.979150  | 0.710358  | -0.289372 |
|  |  | C | 5.797302  | 1.900902  | -0.322271 |
|  |  | C | 5.236466  | 3.157265  | -0.326803 |
|  |  | C | -1.891095 | -2.331238 | -0.063636 |
|  |  | C | -1.293676 | -3.606158 | -0.098964 |
|  |  | C | 0.154532  | -3.764543 | -0.133439 |
|  |  | C | 0.728023  | -5.082443 | -0.260922 |
|  |  | C | 2.131587  | -5.214808 | -0.338547 |
|  |  | C | 2.994616  | -4.098454 | -0.344055 |
|  |  | C | 4.426785  | -4.209819 | -0.421711 |
|  |  | C | 5.238799  | -3.096635 | -0.406628 |
|  |  | C | -2.144432 | -4.772053 | -0.134122 |
|  |  | C | -1.525391 | -6.070010 | -0.221580 |
|  |  | C | -0.158528 | -6.217669 | -0.290502 |
|  |  | C | -3.304234 | -2.157948 | -0.067070 |
|  |  | C | -4.147269 | -3.328207 | -0.005607 |
|  |  | C | -3.543607 | -4.603839 | -0.059617 |
|  |  | C | -3.892647 | -0.858427 | -0.054796 |
|  |  | C | -5.286381 | -0.679826 | 0.127210  |
|  |  | C | -6.105307 | -1.862473 | 0.232413  |
|  |  | C | -5.563898 | -3.127330 | 0.139555  |
|  |  | C | -5.831960 | 0.642343  | 0.154276  |
|  |  | O | 1.674111  | -0.105934 | -1.478351 |
|  |  | O | -0.327926 | -1.210681 | 1.434491  |
|  |  | O | -2.208224 | 0.175500  | -1.498494 |
|  |  | N | 3.633066  | -0.079946 | 2.257455  |
|  |  | N | 2.612306  | -0.659368 | 2.825673  |
|  |  | H | 6.890627  | 1.782433  | -0.379686 |
|  |  | H | 6.611773  | -0.718055 | -0.431932 |
|  |  | H | 6.332975  | -3.212086 | -0.453910 |
|  |  | H | 4.871016  | -5.215381 | -0.487708 |
|  |  | H | 5.883379  | 4.046622  | -0.389452 |
|  |  | H | 3.862279  | 5.523586  | -0.375042 |
|  |  | H | 2.567450  | -6.224726 | -0.404270 |
|  |  | H | 1.831718  | 6.989941  | -0.400169 |
|  |  | H | 0.284290  | -7.222695 | -0.371408 |
|  |  | H | -6.657849 | 3.258379  | 0.226599  |
|  |  | H | -6.921140 | 0.759210  | 0.269686  |
|  |  | H | -7.191069 | -1.736673 | 0.366988  |
|  |  | H | -6.216816 | -4.012479 | 0.193311  |
|  |  | H | -5.181915 | 5.246978  | 0.050466  |
|  |  | H | -2.903478 | 6.229700  | -0.107973 |
|  |  | H | -4.186038 | -5.498731 | -0.032951 |
|  |  | H | -0.639313 | 7.234650  | -0.293842 |
|  |  | H | -2.177248 | -6.957404 | -0.243069 |

|  |      |                                 |
|--|------|---------------------------------|
|  |      | H 1.123447 0.415593 2.258831    |
|  |      | H 2.575854 -1.626432 2.463975   |
|  |      | H 3.795850 0.894646 2.509177    |
|  |      | H 4.390346 -0.571752 1.765209   |
|  | int2 | C 0.695168 1.206657 0.396616    |
|  |      | O 0.901316 1.199454 1.845264    |
|  |      | C -0.755629 1.355441 0.031685   |
|  |      | C -1.344447 2.603917 -0.082647  |
|  |      | C -2.789632 2.738540 -0.123900  |
|  |      | C -3.365247 4.059828 -0.049639  |
|  |      | C -2.529148 5.173399 -0.066711  |
|  |      | C -1.112596 5.061264 -0.118720  |
|  |      | C -0.515516 3.779377 -0.086355  |
|  |      | C 0.911018 3.642743 -0.134482   |
|  |      | C 1.737359 4.811385 -0.261685   |
|  |      | C 1.100490 6.091169 -0.288546   |
|  |      | C -0.263415 6.212080 -0.208802  |
|  |      | C 1.518093 2.378157 -0.056575   |
|  |      | C -1.536384 0.170544 -0.263039  |
|  |      | C -3.073528 0.287872 -0.348692  |
|  |      | C -3.630648 1.620349 -0.124821  |
|  |      | C -5.045901 1.730746 0.068150   |
|  |      | C -5.594989 3.058370 0.140274   |
|  |      | C -4.795469 4.163424 0.059589   |
|  |      | C -1.030180 -1.167482 0.142897  |
|  |      | C 0.445848 -1.320776 0.178645   |
|  |      | C 1.224581 -0.103441 -0.178959  |
|  |      | C 2.668580 -0.252418 -0.412937  |
|  |      | C 3.524365 0.926455 -0.230951   |
|  |      | C 2.912528 2.220098 -0.187152   |
|  |      | C 3.740018 3.392428 -0.302181   |
|  |      | C 3.134631 4.654697 -0.321997   |
|  |      | C 1.033281 -2.633310 -0.084955  |
|  |      | C 2.439958 -2.739338 -0.242160  |
|  |      | C 3.274564 -1.588523 -0.315443  |
|  |      | C 4.683670 -1.702342 -0.369734  |
|  |      | C 5.492952 -0.527462 -0.393285  |
|  |      | C 4.934587 0.768583 -0.349777   |
|  |      | C 5.734985 1.964884 -0.390345   |
|  |      | C 5.162653 3.207760 -0.386571   |
|  |      | C -1.870463 -2.348605 -0.069280 |
|  |      | C -1.258929 -3.609031 -0.097754 |
|  |      | C 0.187860 -3.751456 -0.127255  |
|  |      | C 0.773470 -5.056915 -0.240723  |
|  |      | C 2.172873 -5.171982 -0.309845  |
|  |      | C 3.020180 -4.052166 -0.320869  |
|  |      | C 4.448602 -4.144476 -0.398466  |
|  |      | C 5.242532 -3.028007 -0.400981  |
|  |      | C -2.092043 -4.779081 -0.126098 |
|  |      | C -1.459343 -6.064556 -0.202921 |
|  |      | C -0.098074 -6.196263 -0.265349 |
|  |      | C -3.279173 -2.189458 -0.071557 |

|         |     |                                 |
|---------|-----|---------------------------------|
|         |     | C -4.103398 -3.364174 -0.004811 |
|         |     | C -3.486723 -4.626036 -0.052477 |
|         |     | C -3.880822 -0.902191 -0.063747 |
|         |     | C -5.267383 -0.738806 0.124056  |
|         |     | C -6.068549 -1.926681 0.231558  |
|         |     | C -5.516221 -3.178344 0.140314  |
|         |     | C -5.826261 0.572464 0.156925   |
|         |     | O 1.662581 -0.111130 -1.537577  |
|         |     | O -0.319797 -1.189090 1.421507  |
|         |     | O -2.223474 0.155954 -1.521921  |
|         |     | N 3.847217 -0.037359 2.281245   |
|         |     | N 2.947548 -0.554204 3.040898   |
|         |     | H 6.820419 1.861101 -0.458766   |
|         |     | H 6.576869 -0.636932 -0.470818  |
|         |     | H 6.328976 -3.131028 -0.452800  |
|         |     | H 4.902645 -5.136732 -0.454056  |
|         |     | H 5.793632 4.097415 -0.454980   |
|         |     | H 3.764786 5.545754 -0.393330   |
|         |     | H 2.616824 -6.169942 -0.365815  |
|         |     | H 1.726436 6.982977 -0.369977   |
|         |     | H 0.351981 -7.189220 -0.336814  |
|         |     | H -6.675682 3.168241 0.256396   |
|         |     | H -6.907974 0.673805 0.277007   |
|         |     | H -7.146868 -1.814845 0.366789  |
|         |     | H -6.154601 -4.063163 0.195866  |
|         |     | H -5.235986 5.162244 0.105972   |
|         |     | H -2.974344 6.171784 -0.038275  |
|         |     | H -4.113415 -5.521670 -0.019451 |
|         |     | H -0.727819 7.200752 -0.227215  |
|         |     | H -2.095300 -6.952702 -0.220074 |
|         |     | H 0.373874 0.440902 2.177519    |
|         |     | H 2.778053 -1.513793 2.690561   |
|         |     | H 4.101944 0.933970 2.466669    |
|         |     | H 4.418777 -0.545341 1.587342   |
| Route 2 | SC2 | N -2.901114 -0.135224 2.959925  |
|         |     | C -2.791395 0.316109 -0.396263  |
|         |     | C -1.361882 0.180377 -0.683473  |
|         |     | C -0.467207 1.298153 -0.259392  |
|         |     | O -0.703323 1.701396 1.089241   |
|         |     | N -1.616449 -0.778769 3.011765  |
|         |     | C -3.350920 1.624762 -0.255984  |
|         |     | C -4.791129 1.757144 -0.201334  |
|         |     | C -5.581227 0.593594 -0.196534  |
|         |     | C -5.017870 -0.704260 -0.230144 |
|         |     | C -3.585859 -0.845048 -0.345692 |
|         |     | C -2.987511 -2.173657 -0.326577 |
|         |     | C -3.832605 -3.337907 -0.198575 |
|         |     | C -5.252223 -3.149687 -0.135637 |
|         |     | C -5.818844 -1.889991 -0.150275 |
|         |     | C -0.741966 -1.196264 -0.665733 |
|         |     | C -1.590434 -2.350045 -0.357753 |
|         |     | C -0.983322 -3.634460 -0.195078 |

|  |  |   |           |           |           |
|--|--|---|-----------|-----------|-----------|
|  |  | C | -1.839136 | -4.799471 | -0.133005 |
|  |  | C | -3.234227 | -4.619580 | -0.140386 |
|  |  | C | -1.081058 | 2.644199  | -0.022981 |
|  |  | C | -2.533858 | 2.785696  | -0.183553 |
|  |  | C | -3.095343 | 4.094012  | -0.150943 |
|  |  | C | -4.535714 | 4.203145  | -0.154776 |
|  |  | C | -5.341853 | 3.087543  | -0.157659 |
|  |  | C | -0.215381 | 3.828654  | -0.093604 |
|  |  | C | -0.824875 | 5.115531  | -0.067877 |
|  |  | C | -2.240063 | 5.224720  | -0.082514 |
|  |  | C | 0.987358  | 1.239430  | -0.589281 |
|  |  | C | 1.813568  | 2.390322  | -0.218001 |
|  |  | C | 1.197139  | 3.672632  | -0.083335 |
|  |  | C | 2.047285  | 4.837216  | 0.038779  |
|  |  | C | 1.413488  | 6.130358  | 0.075710  |
|  |  | C | 0.045634  | 6.265877  | 0.005745  |
|  |  | C | 3.206309  | 2.213996  | -0.106143 |
|  |  | C | 4.042977  | 3.377511  | 0.073586  |
|  |  | C | 3.441032  | 4.658494  | 0.107837  |
|  |  | C | 3.805024  | 0.884775  | -0.096270 |
|  |  | C | 3.014469  | -0.276127 | -0.197293 |
|  |  | C | 1.607115  | -0.136823 | -0.578680 |
|  |  | C | 0.685514  | -1.258817 | -0.235626 |
|  |  | C | 5.229954  | 0.742101  | 0.092423  |
|  |  | C | 6.025292  | 1.928492  | 0.219540  |
|  |  | C | 5.457799  | 3.188291  | 0.210700  |
|  |  | C | 3.565395  | -1.585748 | -0.042164 |
|  |  | C | 2.745856  | -2.746432 | -0.039187 |
|  |  | C | 1.284674  | -2.607939 | 0.030133  |
|  |  | C | 0.426600  | -3.791385 | -0.117752 |
|  |  | O | -1.040438 | -0.518346 | -1.900646 |
|  |  | C | 5.000427  | -1.720000 | 0.086248  |
|  |  | C | 5.790145  | -0.557159 | 0.144374  |
|  |  | C | 5.548182  | -3.051323 | 0.140261  |
|  |  | C | 4.742990  | -4.165969 | 0.080204  |
|  |  | C | 3.304867  | -4.055377 | 0.002031  |
|  |  | C | 2.447292  | -5.186623 | -0.000972 |
|  |  | C | 1.033569  | -5.078499 | -0.071870 |
|  |  | C | -1.208845 | -6.093403 | -0.072455 |
|  |  | C | 0.160731  | -6.229397 | -0.064686 |
|  |  | O | 1.370195  | 0.574751  | -1.808065 |
|  |  | O | 0.829487  | -1.684786 | 1.117120  |
|  |  | H | -0.411863 | 7.267261  | 0.026519  |
|  |  | H | -2.692934 | 6.227703  | -0.040303 |
|  |  | H | -4.984123 | 5.208533  | -0.130514 |
|  |  | H | -6.437130 | 3.198040  | -0.129337 |
|  |  | H | 2.052984  | 7.023103  | 0.157866  |
|  |  | H | 4.087989  | 5.544989  | 0.206204  |
|  |  | H | -6.677249 | 0.693737  | -0.145591 |
|  |  | H | 6.095376  | 4.078741  | 0.326007  |
|  |  | H | -6.912104 | -1.778517 | -0.081138 |
|  |  | H | 5.189156  | -5.172090 | 0.113664  |

|  |     |                                 |
|--|-----|---------------------------------|
|  |     | H 2.897566 -6.190243 0.053369   |
|  |     | H 0.616193 -7.231218 -0.028215  |
|  |     | H -1.852364 -6.986235 -0.036100 |
|  |     | H 6.640203 -3.163489 0.227314   |
|  |     | H 6.882353 -0.658968 0.248275   |
|  |     | H -3.886369 -5.505775 -0.082965 |
|  |     | H 7.114035 1.817271 0.341790    |
|  |     | H -5.894566 -4.040505 -0.056275 |
|  |     | H -1.626535 -1.545573 2.336894  |
|  |     | H -0.865183 -0.143239 2.719530  |
|  |     | H -3.052055 0.296560 3.873403   |
|  |     | H -2.903434 0.623276 2.267884   |
|  | ts1 | N -1.999232 -0.755346 2.769532  |
|  |     | C -2.832121 -0.290946 -0.295294 |
|  |     | C -1.403495 -0.130002 -0.578130 |
|  |     | C -0.764394 1.161448 -0.184869  |
|  |     | O -1.080017 1.566808 1.147991   |
|  |     | N -0.670197 -0.492702 3.207624  |
|  |     | C -3.651472 0.875566 -0.192102  |
|  |     | C -5.088948 0.707695 -0.151172  |
|  |     | C -5.620870 -0.594825 -0.139528 |
|  |     | C -4.800702 -1.750182 -0.166642 |
|  |     | C -3.371281 -1.593000 -0.264018 |
|  |     | C -2.510946 -2.766694 -0.260964 |
|  |     | C -3.092137 -4.081213 -0.153257 |
|  |     | C -4.522800 -4.193196 -0.090431 |
|  |     | C -5.339150 -3.079742 -0.098780 |
|  |     | C -0.517285 -1.336032 -0.575082 |
|  |     | C -1.107714 -2.646840 -0.298428 |
|  |     | C -0.243866 -3.772846 -0.192336 |
|  |     | C -0.833405 -5.089098 -0.121362 |
|  |     | C -2.236898 -5.207820 -0.107392 |
|  |     | C -1.643052 2.358162 -0.010174  |
|  |     | C -3.093401 2.184418 -0.158546  |
|  |     | C -3.914209 3.348957 -0.164192  |
|  |     | C -5.346217 3.155602 -0.165428  |
|  |     | C -5.902941 1.896914 -0.139986  |
|  |     | C -1.039852 3.691564 -0.122118  |
|  |     | C -1.901682 4.823349 -0.128718  |
|  |     | C -3.310525 4.633355 -0.137892  |
|  |     | C 0.669238 1.389564 -0.534993   |
|  |     | C 1.242882 2.698493 -0.206011   |
|  |     | C 0.376864 3.829610 -0.108785   |
|  |     | C 0.967461 5.146901 -0.021023   |
|  |     | C 0.079430 6.281306 -0.018885   |
|  |     | C -1.287433 6.130216 -0.089967  |
|  |     | C 2.642747 2.815670 -0.111334   |
|  |     | C 3.221982 4.130257 0.035489    |
|  |     | C 2.369470 5.260027 0.048003    |
|  |     | C 3.504151 1.639227 -0.110153   |
|  |     | C 2.970699 0.339072 -0.207805   |
|  |     | C 1.550721 0.178747 -0.530972   |

|  |      |                                 |
|--|------|---------------------------------|
|  |      | C 0.904602 -1.121153 -0.126581  |
|  |      | C 4.929282 1.794620 0.048640    |
|  |      | C 5.463358 3.123225 0.164012    |
|  |      | C 4.648921 4.237913 0.155900    |
|  |      | C 3.781591 -0.826065 -0.105101  |
|  |      | C 3.211354 -2.140347 -0.133140  |
|  |      | C 1.782938 -2.319321 -0.119542  |
|  |      | C 1.181343 -3.626221 -0.175130  |
|  |      | O -0.958975 -0.733703 -1.810782 |
|  |      | C 5.210393 -0.662805 0.016924   |
|  |      | C 5.744764 0.639190 0.085907    |
|  |      | C 6.025106 -1.851954 0.055085   |
|  |      | C 5.469661 -3.109086 -0.006797  |
|  |      | C 4.040827 -3.303493 -0.085018  |
|  |      | C 3.442509 -4.587278 -0.083140  |
|  |      | C 2.038677 -4.769162 -0.127275  |
|  |      | C 0.053520 -6.225173 -0.078956  |
|  |      | C 1.420809 -6.074025 -0.094855  |
|  |      | O 1.148450 0.810344 -1.765352   |
|  |      | O 1.088766 -1.402286 1.239208   |
|  |      | H -1.941049 7.016384 -0.096103  |
|  |      | H -3.961771 5.521521 -0.124476  |
|  |      | H -5.994250 4.045872 -0.168232  |
|  |      | H -6.997747 1.779304 -0.118302  |
|  |      | H 0.520049 7.289080 0.036553    |
|  |      | H 2.820200 6.262858 0.121387    |
|  |      | H -6.714733 -0.722969 -0.102437 |
|  |      | H 5.090627 5.241919 0.254170    |
|  |      | H -6.432391 -3.198874 -0.039595 |
|  |      | H 6.116378 -3.999913 0.022902   |
|  |      | H 4.091606 -5.475579 -0.031215  |
|  |      | H 2.074212 -6.959931 -0.064579  |
|  |      | H -0.389955 -7.232250 -0.034577 |
|  |      | H 7.117094 -1.734403 0.136069   |
|  |      | H 6.835550 0.762799 0.181295    |
|  |      | H -2.685801 -6.212560 -0.050599 |
|  |      | H 6.553248 3.240346 0.270494    |
|  |      | H -4.966105 -5.199112 -0.023093 |
|  |      | H -0.011382 -1.024438 2.606732  |
|  |      | H -0.452765 0.498912 3.089021   |
|  |      | H -2.538900 -1.125550 3.554173  |
|  |      | H -2.442927 0.098329 2.425849   |
|  | int1 | N 1.817733 0.301940 3.128249    |
|  |      | C 2.825974 0.445333 -0.059492   |
|  |      | C 1.384178 0.215938 -0.221126   |
|  |      | C 0.874740 -1.150851 0.192813   |
|  |      | O 1.106309 -1.418579 1.635287   |
|  |      | N 0.717688 -0.382437 2.630092   |
|  |      | C 3.678540 -0.669706 -0.187586  |
|  |      | C 5.099085 -0.451895 -0.193456  |
|  |      | C 5.584691 0.870067 -0.040203   |
|  |      | C 4.723539 1.987096 0.064113    |

|  |  |   |           |           |           |
|--|--|---|-----------|-----------|-----------|
|  |  | C | 3.302328  | 1.772491  | 0.027828  |
|  |  | C | 2.387623  | 2.906058  | 0.026827  |
|  |  | C | 2.904768  | 4.246767  | 0.063774  |
|  |  | C | 4.337170  | 4.418962  | 0.156490  |
|  |  | C | 5.200898  | 3.347621  | 0.156648  |
|  |  | C | 0.453766  | 1.367258  | -0.241794 |
|  |  | C | 0.989523  | 2.725275  | -0.065948 |
|  |  | C | 0.083240  | 3.799130  | -0.168497 |
|  |  | C | 0.603747  | 5.138500  | -0.173503 |
|  |  | C | 1.999312  | 5.329335  | -0.033848 |
|  |  | C | 1.756242  | -2.261840 | -0.298201 |
|  |  | C | 3.138510  | -2.009737 | -0.382558 |
|  |  | C | 4.029133  | -3.118814 | -0.589267 |
|  |  | C | 5.449818  | -2.854758 | -0.607929 |
|  |  | C | 5.960112  | -1.593562 | -0.405437 |
|  |  | C | 1.210532  | -3.556070 | -0.361550 |
|  |  | C | 2.096975  | -4.666204 | -0.577875 |
|  |  | C | 3.483166  | -4.416178 | -0.704738 |
|  |  | C | -0.581285 | -1.360653 | -0.178675 |
|  |  | C | -1.110376 | -2.718265 | 0.011308  |
|  |  | C | -0.211132 | -3.792378 | -0.140173 |
|  |  | C | -0.731111 | -5.131464 | -0.140608 |
|  |  | C | 0.190984  | -6.217438 | -0.372713 |
|  |  | C | 1.532409  | -5.996728 | -0.593476 |
|  |  | C | -2.506129 | -2.897204 | 0.130068  |
|  |  | C | -3.021800 | -4.238170 | 0.177317  |
|  |  | C | -2.120881 | -5.322069 | 0.047782  |
|  |  | C | -3.417925 | -1.762068 | 0.144820  |
|  |  | C | -2.943040 | -0.438745 | 0.020496  |
|  |  | C | -1.507457 | -0.210333 | -0.197628 |
|  |  | C | -0.984508 | 1.158916  | 0.207674  |
|  |  | C | -4.834989 | -1.977757 | 0.224595  |
|  |  | C | -5.310060 | -3.337762 | 0.337387  |
|  |  | C | -4.449160 | -4.410951 | 0.312084  |
|  |  | C | -3.800813 | 0.677732  | -0.069948 |
|  |  | C | -3.268810 | 2.020676  | -0.271170 |
|  |  | C | -1.888408 | 2.271427  | -0.242500 |
|  |  | C | -1.347901 | 3.564996  | -0.326095 |
|  |  | O | 0.903260  | 0.758227  | -1.474349 |
|  |  | C | -5.220240 | 0.458622  | -0.020717 |
|  |  | C | -5.699952 | -0.860679 | 0.147765  |
|  |  | C | -6.088336 | 1.600972  | -0.189163 |
|  |  | C | -5.591069 | 2.865169  | -0.397549 |
|  |  | C | -4.170708 | 3.131047  | -0.432239 |
|  |  | C | -3.632391 | 4.430598  | -0.556991 |
|  |  | C | -2.241447 | 4.677905  | -0.491260 |
|  |  | C | -0.328321 | 6.227300  | -0.354954 |
|  |  | C | -1.675983 | 6.007762  | -0.518477 |
|  |  | O | -1.041667 | -0.798689 | -1.436501 |
|  |  | O | -1.065251 | 1.289740  | 1.628509  |
|  |  | H | 2.208573  | -6.846754 | -0.771882 |
|  |  | H | 4.165072  | -5.269291 | -0.854776 |

|  |     |                                 |
|--|-----|---------------------------------|
|  |     | H 6.132682 -3.702415 -0.773921  |
|  |     | H 7.049296 -1.431537 -0.419051  |
|  |     | H -0.203777 -7.245669 -0.382927 |
|  |     | H -2.520315 -6.349045 0.057216  |
|  |     | H 6.673776 1.038462 -0.039265   |
|  |     | H -4.846820 -5.435846 0.375772  |
|  |     | H 6.286023 3.517263 0.207192    |
|  |     | H -6.281494 3.713430 -0.525591  |
|  |     | H -4.320572 5.284560 -0.669375  |
|  |     | H -2.358659 6.860140 -0.657525  |
|  |     | H 0.068085 7.255648 -0.366745   |
|  |     | H -7.177210 1.436873 -0.157525  |
|  |     | H -6.788626 -1.028443 0.187817  |
|  |     | H 2.397380 6.356884 -0.030482   |
|  |     | H -6.395785 -3.505558 0.421268  |
|  |     | H 4.733603 5.446210 0.209113    |
|  |     | H -0.422183 0.631393 2.042188   |
|  |     | H 0.372286 -0.998463 3.370089   |
|  |     | H 2.066899 1.053562 2.480149    |
|  |     | H 2.626820 -0.316004 3.256600   |
|  | ts2 | C 5.886075 -2.012817 -0.453118  |
|  |     | C 5.100808 -0.799818 -0.476184  |
|  |     | C 3.673284 -0.913888 -0.356719  |
|  |     | C 3.061541 -2.228329 -0.184021  |
|  |     | C 3.880610 -3.408519 -0.142378  |
|  |     | C 5.308906 -3.249352 -0.285382  |
|  |     | C 3.253235 -4.667133 0.007272   |
|  |     | C 1.848341 -4.809042 0.083977   |
|  |     | C 1.027170 -3.631385 0.012304   |
|  |     | C 1.661264 -2.374614 -0.101631  |
|  |     | C 0.833055 -1.177610 -0.309221  |
|  |     | C -0.644037 -1.284943 -0.261382 |
|  |     | C -1.252198 -2.604376 -0.073360 |
|  |     | C -0.423244 -3.743078 0.020153  |
|  |     | C -1.475324 -0.088895 0.186060  |
|  |     | C -2.900496 -0.205653 -0.282125 |
|  |     | C -3.475134 -1.490208 -0.357495 |
|  |     | C -2.656229 -2.687547 -0.180870 |
|  |     | C -1.041091 -5.046842 0.069201  |
|  |     | C -2.449436 -5.135228 -0.029352 |
|  |     | C -3.270627 -3.993593 -0.183678 |
|  |     | C 1.469610 0.140625 0.073412    |
|  |     | C 0.628920 1.351940 -0.294149   |
|  |     | C -0.845729 1.224320 -0.257844  |
|  |     | C -1.663983 2.417257 -0.044967  |
|  |     | C -3.062618 2.273523 -0.147346  |
|  |     | C -3.676685 0.971145 -0.335989  |
|  |     | C -4.890604 -1.606618 -0.533867 |
|  |     | C -5.467791 -2.938869 -0.549848 |
|  |     | C -4.702196 -4.067419 -0.374145 |
|  |     | C 1.189590 -6.090891 0.180164   |
|  |     | C -0.181753 -6.203538 0.172743  |



|  |        |   |           |           |           |
|--|--------|---|-----------|-----------|-----------|
|  |        | C | 2.905880  | 0.261186  | -0.321839 |
|  |        | C | -5.098660 | 0.851751  | -0.507316 |
|  |        | C | -5.672633 | -0.435191 | -0.620924 |
|  |        | C | -3.878757 | 3.455750  | -0.103873 |
|  |        | C | -5.303422 | 3.306896  | -0.288440 |
|  |        | C | -5.876341 | 2.072610  | -0.492500 |
|  |        | C | 1.253434  | 2.657238  | -0.069392 |
|  |        | C | 0.422280  | 3.791392  | 0.076132  |
|  |        | C | -1.028606 | 3.672776  | 0.075775  |
|  |        | C | -1.847919 | 4.851666  | 0.162777  |
|  |        | C | -3.252198 | 4.712704  | 0.073957  |
|  |        | C | 1.041811  | 5.086058  | 0.179167  |
|  |        | C | 0.184342  | 6.242425  | 0.315249  |
|  |        | C | -1.187015 | 6.130916  | 0.299985  |
|  |        | C | 2.450587  | 5.175758  | 0.100995  |
|  |        | C | 3.274113  | 4.038242  | -0.074401 |
|  |        | C | 2.658204  | 2.741066  | -0.141338 |
|  |        | C | 3.473417  | 1.546183  | -0.333725 |
|  |        | C | 4.708393  | 4.115005  | -0.216988 |
|  |        | C | 5.477825  | 2.990376  | -0.407099 |
|  |        | C | 4.899315  | 1.666368  | -0.455933 |
|  |        | C | 5.674821  | 0.488524  | -0.546540 |
|  |        | O | 0.077400  | -1.218902 | -1.532188 |
|  |        | O | -1.759507 | -0.107642 | 1.560456  |
|  |        | O | -0.123725 | 1.283545  | -1.522580 |
|  |        | O | 1.609318  | 0.137892  | 1.575750  |
|  |        | N | -0.426943 | 0.024649  | 3.098888  |
|  |        | N | 0.345236  | -0.989630 | 3.158131  |
|  |        | H | -6.965810 | 1.989634  | -0.631875 |
|  |        | H | -6.764884 | -0.523030 | -0.738155 |
|  |        | H | -6.556613 | -3.031113 | -0.688545 |
|  |        | H | -5.178086 | -5.060701 | -0.380731 |
|  |        | H | -5.933936 | 4.209813  | -0.271746 |
|  |        | H | -3.878890 | 5.618621  | 0.106434  |
|  |        | H | -2.921669 | -6.130822 | -0.025343 |
|  |        | H | -1.811506 | 7.034721  | 0.386846  |
|  |        | H | -0.651493 | -7.197710 | 0.230858  |
|  |        | H | 6.569034  | 3.084165  | -0.515815 |
|  |        | H | 6.769651  | 0.578359  | -0.621248 |
|  |        | H | 6.978331  | -1.927120 | -0.565228 |
|  |        | H | 5.939342  | -4.152146 | -0.264016 |
|  |        | H | 5.184091  | 5.107861  | -0.172925 |
|  |        | H | 2.922522  | 6.170734  | 0.156772  |
|  |        | H | 3.880996  | -5.572271 | 0.040128  |
|  |        | H | 0.655579  | 7.234489  | 0.404359  |
|  |        | H | 1.815402  | -6.994299 | 0.252539  |
|  |        | H | 2.592040  | 0.016340  | 1.778359  |
|  |        | H | -1.364822 | -0.138543 | 3.568339  |
|  |        | H | 1.226099  | -0.635035 | 2.346557  |
|  |        | H | -0.031822 | -1.904916 | 3.495127  |
|  | 2E_2OH | C | 5.431156  | -3.067112 | -0.113069 |
|  |        | C | 4.877261  | -1.734452 | -0.176719 |

|  |  |   |           |           |           |
|--|--|---|-----------|-----------|-----------|
|  |  | C | 3.446520  | -1.586327 | -0.136824 |
|  |  | C | 2.600076  | -2.769512 | -0.031003 |
|  |  | C | 3.192018  | -4.076710 | 0.063049  |
|  |  | C | 4.631883  | -4.178699 | 0.014393  |
|  |  | C | 2.343732  | -5.201652 | 0.168630  |
|  |  | C | 0.935224  | -5.087647 | 0.172788  |
|  |  | C | 0.342861  | -3.783298 | 0.049730  |
|  |  | C | 1.193877  | -2.659879 | -0.054523 |
|  |  | C | 0.603177  | -1.336896 | -0.306966 |
|  |  | C | -0.868072 | -1.185347 | -0.295228 |
|  |  | C | -1.709407 | -2.365749 | -0.053852 |
|  |  | C | -1.102885 | -3.636807 | 0.043914  |
|  |  | C | -1.433658 | 0.143153  | 0.191135  |
|  |  | C | -2.899219 | 0.294212  | -0.110507 |
|  |  | C | -3.696594 | -0.861837 | -0.140283 |
|  |  | C | -3.107701 | -2.191002 | -0.043503 |
|  |  | C | -1.944110 | -4.797480 | 0.152864  |
|  |  | C | -3.346202 | -4.628218 | 0.128623  |
|  |  | C | -3.949301 | -3.354393 | 0.023142  |
|  |  | C | 1.431202  | -0.143840 | 0.149546  |
|  |  | C | 0.860088  | 1.191379  | -0.295188 |
|  |  | C | -0.612926 | 1.335975  | -0.280945 |
|  |  | C | -1.198567 | 2.660811  | -0.035758 |
|  |  | C | -2.603443 | 2.769897  | -0.015553 |
|  |  | C | -3.447901 | 1.587265  | -0.122625 |
|  |  | C | -5.126820 | -0.719960 | -0.197937 |
|  |  | C | -5.937253 | -1.915369 | -0.165604 |
|  |  | C | -5.379608 | -3.166475 | -0.047435 |
|  |  | C | 0.056725  | -6.229192 | 0.281144  |
|  |  | C | -1.311419 | -6.090628 | 0.269704  |
|  |  | C | 2.897159  | -0.290262 | -0.130569 |
|  |  | C | -4.877682 | 1.736115  | -0.175856 |
|  |  | C | -5.681475 | 0.577271  | -0.226662 |
|  |  | C | -3.194225 | 4.077471  | 0.067784  |
|  |  | C | -4.633762 | 4.180659  | 0.011910  |
|  |  | C | -5.431981 | 3.068854  | -0.117922 |
|  |  | C | 1.706666  | 2.368565  | -0.058396 |
|  |  | C | 1.098185  | 3.638783  | 0.045015  |
|  |  | C | -0.348079 | 3.783973  | 0.057208  |
|  |  | C | -0.939110 | 5.089064  | 0.176268  |
|  |  | C | -2.346933 | 5.203747  | 0.171809  |
|  |  | C | 1.940305  | 4.799479  | 0.151300  |
|  |  | C | 1.308484  | 6.093207  | 0.268261  |
|  |  | C | -0.059701 | 6.230206  | 0.280656  |
|  |  | C | 3.342871  | 4.631157  | 0.124819  |
|  |  | C | 3.946952  | 3.358376  | 0.018177  |
|  |  | C | 3.105086  | 2.195492  | -0.052679 |
|  |  | C | 3.695332  | 0.868245  | -0.150963 |
|  |  | C | 5.377225  | 3.169747  | -0.047620 |
|  |  | C | 5.936884  | 1.919103  | -0.162562 |
|  |  | C | 5.125597  | 0.724378  | -0.198946 |
|  |  | C | 5.679217  | -0.574142 | -0.222988 |

|  |      |                                 |
|--|------|---------------------------------|
|  |      | O -0.135342 -1.260555 -1.544692 |
|  |      | O -1.407885 0.127376 1.634732   |
|  |      | O 0.118981 1.256253 -1.529556   |
|  |      | O 1.313669 -0.077529 1.622441   |
|  |      | H -6.526980 3.178910 -0.160916  |
|  |      | H -6.777540 0.688681 -0.252783  |
|  |      | H -7.031625 -1.803135 -0.218394 |
|  |      | H -6.025888 -4.057394 -0.009680 |
|  |      | H -5.087955 5.182319 0.069083   |
|  |      | H -2.800005 6.205929 0.240025   |
|  |      | H -3.991647 -5.519548 0.184956  |
|  |      | H -0.512261 7.230273 0.370926   |
|  |      | H -1.955472 -6.980308 0.351730  |
|  |      | H 7.031332 1.806761 -0.210314   |
|  |      | H 6.775466 -0.685214 -0.241805  |
|  |      | H 6.526257 -3.177215 -0.150274  |
|  |      | H 5.086100 -5.180062 0.075665   |
|  |      | H 6.023290 4.060746 -0.007285   |
|  |      | H 3.987470 5.523059 0.181651    |
|  |      | H 2.796642 -6.203661 0.240341   |
|  |      | H 1.952653 6.982905 0.348296    |
|  |      | H 0.509315 -7.229000 0.372601   |
|  |      | H -0.457563 0.033997 1.891263   |
|  |      | H 1.856687 -0.804575 1.982425   |
|  | SC2' | C -2.078193 5.274526 -0.409741  |
|  |      | C -0.677828 5.121261 -0.321174  |
|  |      | C -0.125889 3.794214 -0.264752  |
|  |      | C -0.998498 2.690829 -0.289560  |
|  |      | C -2.394144 2.841917 -0.372583  |
|  |      | C -2.952093 4.167231 -0.422715  |
|  |      | C 1.311760 3.617035 -0.118174   |
|  |      | C 2.173756 4.760663 0.005697    |
|  |      | C 1.577907 6.074382 -0.059768   |
|  |      | C 0.224411 6.245626 -0.229210   |
|  |      | C -0.436807 1.327251 0.003730   |
|  |      | C 1.018296 1.182033 -0.420304   |
|  |      | C 1.887896 2.331120 -0.133066   |
|  |      | C 3.276133 2.120381 0.018076    |
|  |      | C 4.133981 3.262714 0.180800    |
|  |      | C 3.562864 4.554566 0.159498    |
|  |      | C 3.838423 0.780216 0.030762    |
|  |      | C 5.253599 0.595064 0.203620    |
|  |      | C 6.082460 1.767689 0.359015    |
|  |      | C 5.550498 3.035572 0.348666    |
|  |      | C 3.016734 -0.360148 -0.104835  |
|  |      | C 1.588717 -0.183276 -0.402013  |
|  |      | C -1.318554 0.198304 -0.518455  |
|  |      | C -0.747378 -1.166487 -0.497510 |
|  |      | C 0.671176 -1.315904 0.040643   |
|  |      | C 1.252744 -2.676025 -0.227360  |
|  |      | C 2.649764 -2.824450 -0.198270  |
|  |      | C 3.530579 -1.671807 -0.067976  |

|  |  |   |           |           |           |
|--|--|---|-----------|-----------|-----------|
|  |  | C | 4.949954  | -1.855617 | 0.064204  |
|  |  | C | 5.775351  | -0.717518 | 0.204783  |
|  |  | C | -1.637744 | -2.316033 | -0.281239 |
|  |  | C | -1.063116 | -3.602070 | -0.227442 |
|  |  | C | 0.382224  | -3.777518 | -0.275052 |
|  |  | C | 0.936326  | -5.104689 | -0.300899 |
|  |  | C | 2.338872  | -5.256798 | -0.291810 |
|  |  | C | 3.210544  | -4.148888 | -0.227830 |
|  |  | C | 4.644876  | -4.290332 | -0.131033 |
|  |  | C | 5.470677  | -3.201989 | 0.021921  |
|  |  | C | -3.283045 | 1.688490  | -0.329690 |
|  |  | C | -2.767712 | 0.375007  | -0.342696 |
|  |  | C | -3.596215 | -0.767273 | -0.254980 |
|  |  | C | -3.033352 | -2.107318 | -0.224728 |
|  |  | C | -3.899531 | -3.249191 | -0.109795 |
|  |  | C | -3.327505 | -4.540553 | -0.093844 |
|  |  | C | -1.931120 | -4.746375 | -0.162209 |
|  |  | C | -1.332511 | -6.060256 | -0.193710 |
|  |  | C | 0.029445  | -6.228677 | -0.275531 |
|  |  | C | -4.708899 | 1.872712  | -0.278392 |
|  |  | C | -5.540013 | 0.732966  | -0.183971 |
|  |  | C | -5.019571 | -0.581171 | -0.157808 |
|  |  | C | -5.856370 | -1.753536 | -0.043506 |
|  |  | C | -5.323376 | -3.021163 | -0.022772 |
|  |  | C | -4.389687 | 4.308023  | -0.425492 |
|  |  | C | -5.225818 | 3.219963  | -0.340016 |
|  |  | O | 1.343053  | 0.506128  | -1.652603 |
|  |  | O | 0.592999  | -1.268892 | 1.484655  |
|  |  | O | -0.360164 | 1.223977  | 1.457009  |
|  |  | O | -0.983694 | -0.481388 | -1.750380 |
|  |  | N | -2.625061 | 0.526751  | 2.785514  |
|  |  | N | -2.364254 | -0.854887 | 3.109171  |
|  |  | H | 0.458053  | -7.242908 | -0.301415 |
|  |  | H | 2.765974  | -6.272654 | -0.296652 |
|  |  | H | 5.070682  | -5.305562 | -0.161350 |
|  |  | H | 6.559248  | -3.343618 | 0.110769  |
|  |  | H | -3.992463 | -5.417196 | -0.034010 |
|  |  | H | 6.862954  | -0.858638 | 0.311958  |
|  |  | H | -5.986904 | -3.896007 | 0.063510  |
|  |  | H | 7.166761  | 1.625892  | 0.490315  |
|  |  | H | -4.812117 | 5.323977  | -0.474591 |
|  |  | H | -2.503542 | 6.290798  | -0.434904 |
|  |  | H | -0.201378 | 7.260046  | -0.279274 |
|  |  | H | 2.238528  | 6.951701  | 0.023224  |
|  |  | H | -6.317726 | 3.361982  | -0.322576 |
|  |  | H | -6.631918 | 0.873763  | -0.136465 |
|  |  | H | 4.223399  | 5.430981  | 0.258786  |
|  |  | H | -6.946294 | -1.611781 | 0.026089  |
|  |  | H | 6.207915  | 3.910594  | 0.471637  |
|  |  | H | 0.346223  | -0.323141 | 1.694461  |
|  |  | H | -1.282908 | 1.116528  | 1.885819  |
|  |  | H | -1.996527 | -6.938025 | -0.157082 |

|  |     |             |           |           |
|--|-----|-------------|-----------|-----------|
|  |     | H -1.628309 | -1.190533 | 2.479398  |
|  |     | H -3.194368 | -1.424240 | 2.927014  |
|  |     | H -2.830962 | 1.017024  | 3.658346  |
|  |     | H -3.436651 | 0.631219  | 2.167733  |
|  | ts3 | C -0.760866 | -5.659384 | -0.196858 |
|  |     | C -1.911953 | -4.840026 | -0.175670 |
|  |     | C -1.760878 | -3.419638 | -0.272642 |
|  |     | C -0.448944 | -2.853609 | -0.396450 |
|  |     | C 0.708045  | -3.699759 | -0.366475 |
|  |     | C 0.542283  | -5.118837 | -0.266948 |
|  |     | C -2.917493 | -2.568244 | -0.173542 |
|  |     | C -4.223927 | -3.140647 | 0.039117  |
|  |     | C -4.341407 | -4.575638 | 0.093359  |
|  |     | C -3.237976 | -5.387322 | -0.016558 |
|  |     | C -0.294178 | -1.462570 | -0.506182 |
|  |     | C -1.477400 | -0.598524 | -0.623858 |
|  |     | C -2.787679 | -1.162149 | -0.267880 |
|  |     | C -3.892406 | -0.301411 | -0.066989 |
|  |     | C -5.193502 | -0.875453 | 0.158233  |
|  |     | C -5.330091 | -2.279804 | 0.184905  |
|  |     | C -3.730604 | 1.140422  | -0.036676 |
|  |     | C -4.869221 | 1.991371  | 0.185876  |
|  |     | C -6.161807 | 1.376420  | 0.366085  |
|  |     | C -6.314724 | 0.010705  | 0.357012  |
|  |     | C -2.457043 | 1.729134  | -0.175347 |
|  |     | C -1.306057 | 0.889364  | -0.551170 |
|  |     | C 1.042011  | -0.884263 | -0.728511 |
|  |     | C 1.212915  | 0.599371  | -0.649581 |
|  |     | C 0.047210  | 1.403302  | -0.088803 |
|  |     | C 0.207174  | 2.886685  | -0.296840 |
|  |     | C -0.935198 | 3.701796  | -0.232191 |
|  |     | C -2.263005 | 3.124436  | -0.099881 |
|  |     | C -3.406842 | 3.977623  | 0.071543  |
|  |     | C -4.681770 | 3.389271  | 0.218613  |
|  |     | C 2.546911  | 1.160691  | -0.366537 |
|  |     | C 2.675624  | 2.562806  | -0.286105 |
|  |     | C 1.503817  | 3.424513  | -0.323773 |
|  |     | C 1.671474  | 4.853563  | -0.307206 |
|  |     | C 0.524960  | 5.673246  | -0.275182 |
|  |     | C -0.776047 | 5.131617  | -0.219463 |
|  |     | C -1.954201 | 5.955804  | -0.088284 |
|  |     | C -3.204725 | 5.407012  | 0.063845  |
|  |     | C 2.029426  | -3.131319 | -0.359418 |
|  |     | C 2.213663  | -1.732343 | -0.462636 |
|  |     | C 3.493409  | -1.144549 | -0.336108 |
|  |     | C 3.663158  | 0.297857  | -0.304391 |
|  |     | C 4.975969  | 0.870707  | -0.156083 |
|  |     | C 5.107977  | 2.276238  | -0.118801 |
|  |     | C 3.991670  | 3.136485  | -0.189800 |
|  |     | C 4.114626  | 4.574897  | -0.189461 |
|  |     | C 3.011084  | 5.390456  | -0.261669 |
|  |     | C 3.184836  | -3.984010 | -0.225416 |

|  |      |                                 |
|--|------|---------------------------------|
|  |      | C 4.463322 -3.396204 -0.152548  |
|  |      | C 4.644454 -1.997016 -0.181051  |
|  |      | C 5.944938 -1.386126 -0.054374  |
|  |      | C 6.104989 -0.020402 -0.047538  |
|  |      | C 1.719203 -5.951378 -0.196249  |
|  |      | C 2.981274 -5.409233 -0.167473  |
|  |      | O -1.477114 0.263119 -1.830110  |
|  |      | O 0.078348 1.254883 1.344433    |
|  |      | O 0.260931 -1.266382 1.941172   |
|  |      | O 1.152313 -0.034467 -1.935791  |
|  |      | N 1.946569 -0.488224 3.585308   |
|  |      | N 2.541396 0.563160 2.943226    |
|  |      | H 3.132910 6.485022 -0.260770   |
|  |      | H 0.650289 6.767734 -0.249986   |
|  |      | H -1.827172 7.049745 -0.089959  |
|  |      | H -4.084612 6.058985 0.180157   |
|  |      | H 6.115146 2.714815 -0.033888   |
|  |      | H -5.557795 4.042251 0.361004   |
|  |      | H 7.109620 0.418913 0.054696    |
|  |      | H -7.033803 2.030004 0.525141   |
|  |      | H 1.582819 -7.042677 -0.141367  |
|  |      | H -0.881943 -6.751547 -0.117172 |
|  |      | H -3.346818 -6.481748 0.037134  |
|  |      | H -5.341521 -5.014196 0.234991  |
|  |      | H 3.864782 -6.061927 -0.089683  |
|  |      | H 5.346652 -4.047521 -0.054771  |
|  |      | H -6.329687 -2.716318 0.340769  |
|  |      | H 6.821449 -2.045402 0.045173   |
|  |      | H -7.309444 -0.435766 0.511773  |
|  |      | H 0.025927 0.255271 1.561835    |
|  |      | H -0.548747 -1.637278 2.339010  |
|  |      | H 5.123638 5.012354 -0.133205   |
|  |      | H 1.845378 1.201317 2.539789    |
|  |      | H 3.291844 0.350906 2.276338    |
|  |      | H 2.658545 -1.214062 3.724257   |
|  |      | H 1.042096 -0.936241 2.901585   |
|  | int3 | C -5.398720 1.710279 -0.355732  |
|  |      | C -4.378473 2.685522 -0.293777  |
|  |      | C -3.009897 2.254200 -0.215336  |
|  |      | C -2.726226 0.873159 -0.187500  |
|  |      | C -3.744110 -0.099410 -0.234748 |
|  |      | C -5.117192 0.328755 -0.317651  |
|  |      | C -1.945754 3.242486 -0.106704  |
|  |      | C -2.261429 4.643513 -0.035527  |
|  |      | C -3.649616 5.032900 -0.116179  |
|  |      | C -4.653768 4.103359 -0.254108  |
|  |      | C -1.328483 0.439291 0.132106   |
|  |      | C -0.274782 1.432705 -0.340785  |
|  |      | C -0.589380 2.850768 -0.107256  |
|  |      | C 0.470537 3.779673 0.002035    |
|  |      | C 0.151790 5.177582 0.110942    |
|  |      | C -1.204518 5.574188 0.079692   |

|  |  |   |           |           |           |
|--|--|---|-----------|-----------|-----------|
|  |  | C | 1.857266  | 3.344125  | 0.015635  |
|  |  | C | 2.913582  | 4.311825  | 0.136187  |
|  |  | C | 2.553098  | 5.706226  | 0.244324  |
|  |  | C | 1.241043  | 6.118607  | 0.232956  |
|  |  | C | 2.196995  | 1.976704  | -0.076592 |
|  |  | C | 1.137400  | 0.989046  | -0.320671 |
|  |  | C | -1.032474 | -0.983299 | -0.314895 |
|  |  | C | 0.378739  | -1.426723 | -0.312463 |
|  |  | C | 1.423627  | -0.427273 | 0.167998  |
|  |  | C | 2.828282  | -0.868408 | -0.133913 |
|  |  | C | 3.842378  | 0.103901  | -0.152859 |
|  |  | C | 3.531458  | 1.523975  | -0.053374 |
|  |  | C | 4.588832  | 2.494185  | 0.027436  |
|  |  | C | 4.253033  | 3.863383  | 0.130431  |
|  |  | C | 0.686450  | -2.844439 | -0.078996 |
|  |  | C | 2.040427  | -3.234526 | -0.059922 |
|  |  | C | 3.106137  | -2.245164 | -0.155816 |
|  |  | C | 4.476783  | -2.678248 | -0.207509 |
|  |  | C | 5.497894  | -1.704723 | -0.242398 |
|  |  | C | 5.214977  | -0.322533 | -0.202512 |
|  |  | C | 6.248547  | 0.685249  | -0.151527 |
|  |  | C | 5.952695  | 2.022300  | -0.028145 |
|  |  | C | -3.436333 | -1.523210 | -0.145410 |
|  |  | C | -2.100540 | -1.973313 | -0.118575 |
|  |  | C | -1.760509 | -3.341497 | -0.020951 |
|  |  | C | -0.372875 | -3.774572 | 0.001924  |
|  |  | C | -0.058076 | -5.173103 | 0.109846  |
|  |  | C | 1.298056  | -5.568917 | 0.105092  |
|  |  | C | 2.354952  | -4.635184 | 0.010851  |
|  |  | C | 3.744656  | -5.025872 | -0.047466 |
|  |  | C | 4.750546  | -4.096370 | -0.164685 |
|  |  | C | -4.495252 | -2.493163 | -0.098463 |
|  |  | C | -4.160389 | -3.861683 | 0.013265  |
|  |  | C | -2.820857 | -4.309690 | 0.062061  |
|  |  | C | -2.463441 | -5.704514 | 0.177163  |
|  |  | C | -1.150624 | -6.113620 | 0.200419  |
|  |  | C | -6.151069 | -0.680731 | -0.303307 |
|  |  | C | -5.857218 | -2.018806 | -0.186469 |
|  |  | O | 0.435955  | 1.203375  | -1.572636 |
|  |  | O | 1.391674  | -0.413389 | 1.606096  |
|  |  | O | -0.322544 | -1.192665 | -1.558665 |
|  |  | N | -1.159475 | 0.488091  | 1.667462  |
|  |  | N | -2.099313 | -0.176463 | 2.495856  |
|  |  | H | 5.800780  | -4.424562 | -0.209469 |
|  |  | H | 6.549110  | -2.034286 | -0.265193 |
|  |  | H | 7.298533  | 0.355609  | -0.193701 |
|  |  | H | 6.764474  | 2.764493  | 0.024564  |
|  |  | H | 1.539927  | -6.642348 | 0.163528  |
|  |  | H | 5.063841  | 4.606433  | 0.197766  |
|  |  | H | -0.909940 | -7.184962 | 0.286660  |
|  |  | H | 3.362102  | 6.447895  | 0.337136  |
|  |  | H | -7.199679 | -0.351002 | -0.371519 |

|  |     |                                 |
|--|-----|---------------------------------|
|  |     | H -6.449283 2.039496 -0.402679  |
|  |     | H -5.702954 4.431412 -0.319293  |
|  |     | H -3.893990 6.105924 -0.073250  |
|  |     | H -6.670653 -2.760885 -0.162709 |
|  |     | H -4.972054 -4.605762 0.054689  |
|  |     | H -1.445991 6.647766 0.137506   |
|  |     | H -3.274113 -6.447048 0.244431  |
|  |     | H 0.998494 7.189481 0.316421    |
|  |     | H 0.470238 -0.080235 1.842389   |
|  |     | H 3.987590 -6.099083 -0.002517  |
|  |     | H -1.889164 -1.175898 2.466689  |
|  |     | H -3.059490 -0.054340 2.147646  |
|  |     | H -1.185995 1.478454 1.930477   |
|  | ts4 | C -5.557965 1.286004 -0.139269  |
|  |     | C -4.609024 2.331301 -0.137266  |
|  |     | C -3.210708 2.021474 -0.225393  |
|  |     | C -2.793477 0.658455 -0.328012  |
|  |     | C -3.765181 -0.391784 -0.265686 |
|  |     | C -5.158849 -0.068397 -0.173552 |
|  |     | C -2.228279 3.071354 -0.147880  |
|  |     | C -2.646977 4.439940 0.031280   |
|  |     | C -4.060274 4.720362 0.080264   |
|  |     | C -4.994308 3.716478 -0.007654  |
|  |     | C -1.416996 0.344617 -0.402808  |
|  |     | C -0.437559 1.415194 -0.596599  |
|  |     | C -0.843763 2.785309 -0.250217  |
|  |     | C 0.135554 3.794638 -0.091904   |
|  |     | C -0.288459 5.155525 0.111452   |
|  |     | C -1.669456 5.446177 0.146827   |
|  |     | C 1.553049 3.479324 -0.074656   |
|  |     | C 2.524148 4.524048 0.132637    |
|  |     | C 2.056507 5.877259 0.289581    |
|  |     | C 0.714096 6.175944 0.280158    |
|  |     | C 2.007728 2.147908 -0.203309   |
|  |     | C 1.051147 1.089108 -0.559218   |
|  |     | C -0.995770 -1.035737 -0.627834 |
|  |     | C 0.491874 -1.383592 -0.566228  |
|  |     | C 1.453531 -0.301669 -0.243880  |
|  |     | C 2.857127 -0.621083 -0.241774  |
|  |     | C 3.805614 0.432423 -0.182580   |
|  |     | C 3.377660 1.809329 -0.099046   |
|  |     | C 4.347828 2.859319 0.072172    |
|  |     | C 3.895781 4.189589 0.180166    |
|  |     | C 0.894534 -2.752835 -0.219905  |
|  |     | C 2.274547 -3.038538 -0.109731  |
|  |     | C 3.255046 -1.981492 -0.184912  |
|  |     | C 4.653500 -2.297747 -0.118897  |
|  |     | C 5.592847 -1.243951 -0.107258  |
|  |     | C 5.203131 0.112809 -0.113791   |
|  |     | C 6.153150 1.193032 0.006948    |
|  |     | C 5.744651 2.501477 0.107725    |
|  |     | C -3.332678 -1.764254 -0.206464 |



|  |       |   |           |           |           |
|--|-------|---|-----------|-----------|-----------|
|  |       | C | -1.956239 | -2.101402 | -0.301088 |
|  |       | C | -1.506366 | -3.434772 | -0.141771 |
|  |       | C | -0.090331 | -3.759595 | -0.111396 |
|  |       | C | 0.333197  | -5.122299 | 0.089955  |
|  |       | C | 1.714187  | -5.412537 | 0.145879  |
|  |       | C | 2.695695  | -4.405836 | 0.050574  |
|  |       | C | 4.109878  | -4.687082 | 0.087094  |
|  |       | C | 5.043575  | -3.682986 | -0.005982 |
|  |       | C | -4.301274 | -2.820785 | -0.041821 |
|  |       | C | -3.850355 | -4.150153 | 0.069481  |
|  |       | C | -2.478007 | -4.481777 | 0.047310  |
|  |       | C | -2.013869 | -5.835531 | 0.213055  |
|  |       | C | -0.673587 | -6.142871 | 0.231253  |
|  |       | C | -6.105112 | -1.153651 | -0.070085 |
|  |       | C | -5.697626 | -2.464467 | 0.001059  |
|  |       | O | 0.378270  | 1.324339  | -1.815573 |
|  |       | O | 1.309418  | -0.325989 | 1.706613  |
|  |       | O | -0.198241 | -1.295332 | -1.831294 |
|  |       | N | -1.565425 | 0.311232  | 2.111309  |
|  |       | N | -0.953071 | -0.697603 | 2.603740  |
|  |       | H | 6.118267  | -3.920657 | 0.027426  |
|  |       | H | 6.665525  | -1.488556 | -0.043995 |
|  |       | H | 7.225034  | 0.943229  | 0.040778  |
|  |       | H | 6.487454  | 3.306881  | 0.218281  |
|  |       | H | 2.033309  | -6.459417 | 0.272867  |
|  |       | H | 4.635210  | 4.995583  | 0.313101  |
|  |       | H | -0.345545 | -7.184958 | 0.369063  |
|  |       | H | 2.801799  | 6.675247  | 0.431878  |
|  |       | H | -7.177231 | -0.905709 | -0.024484 |
|  |       | H | -6.629290 | 1.530248  | -0.067386 |
|  |       | H | -6.068483 | 3.954877  | 0.040203  |
|  |       | H | -4.381093 | 5.767409  | 0.197328  |
|  |       | H | -6.439752 | -3.271882 | 0.101834  |
|  |       | H | -4.591110 | -4.956722 | 0.191990  |
|  |       | H | -1.991476 | 6.491221  | 0.282204  |
|  |       | H | -2.765145 | -6.631233 | 0.337162  |
|  |       | H | 0.378814  | 7.216135  | 0.416584  |
|  |       | H | 1.546275  | 0.592955  | 1.938712  |
|  |       | H | 4.432017  | -5.734971 | 0.191018  |
|  |       | H | 0.254337  | -0.575605 | 2.280001  |
|  |       | H | -1.453069 | -1.605485 | 2.598685  |
|  |       | H | -2.564513 | 0.092432  | 1.941401  |
|  | 2E_op | C | 3.693243  | 4.864132  | -0.806037 |
|  | 2E_op | C | 3.715626  | 3.516322  | -0.303457 |
|  | 2E_op | C | 2.467773  | 2.876701  | -0.007164 |
|  | 2E_op | C | 1.238488  | 3.573029  | -0.222842 |
|  | 2E_op | C | 1.238153  | 4.905874  | -0.772143 |
|  | 2E_op | C | 2.507642  | 5.526610  | -1.039231 |
|  | 2E_op | C | 0.003729  | 5.541469  | -1.023564 |
|  | 2E_op | C | -1.231546 | 4.907471  | -0.772170 |
|  | 2E_op | C | -1.233688 | 3.574639  | -0.222863 |
|  | 2E_op | C | 0.001982  | 2.945192  | 0.078537  |

|  |  |   |           |           |           |
|--|--|---|-----------|-----------|-----------|
|  |  | C | -2.463869 | 2.879901  | -0.007199 |
|  |  | C | -3.710846 | 3.521166  | -0.303549 |
|  |  | C | -3.686655 | 4.868916  | -0.806162 |
|  |  | C | -2.500188 | 5.529863  | -1.039295 |
|  |  | C | -2.458740 | 1.545779  | 0.531118  |
|  |  | C | -1.244342 | 1.091057  | 1.066296  |
|  |  | C | 0.001149  | 1.693846  | 0.772272  |
|  |  | C | 1.245836  | 1.089436  | 1.066294  |
|  |  | C | 2.460845  | 1.542588  | 0.531160  |
|  |  | C | -3.660223 | 0.724520  | 0.505731  |
|  |  | C | -4.901891 | 1.426225  | 0.248343  |
|  |  | C | -4.901549 | 2.795505  | -0.090810 |
|  |  | C | -6.137961 | 0.688988  | 0.243871  |
|  |  | C | -6.138910 | -0.680818 | 0.243956  |
|  |  | C | -4.903840 | -1.419754 | 0.248447  |
|  |  | C | -3.661227 | -0.719716 | 0.505776  |
|  |  | C | -4.905363 | -2.789060 | -0.090676 |
|  |  | C | -3.715628 | -3.516319 | -0.303459 |
|  |  | C | -2.467773 | -2.876700 | -0.007170 |
|  |  | C | -2.460840 | -1.542593 | 0.531167  |
|  |  | C | -1.238490 | -3.573027 | -0.222867 |
|  |  | C | -0.001982 | -2.945193 | 0.078507  |
|  |  | C | -0.001142 | -1.693854 | 0.772254  |
|  |  | C | -1.245827 | -1.089447 | 1.066295  |
|  |  | C | 1.233686  | -3.574637 | -0.222911 |
|  |  | C | 2.463869  | -2.879901 | -0.007252 |
|  |  | C | 2.458745  | -1.545785 | 0.531080  |
|  |  | C | 1.244351  | -1.091069 | 1.066273  |
|  |  | C | 1.231539  | -4.907463 | -0.772231 |
|  |  | C | -0.003738 | -5.541459 | -1.023620 |
|  |  | C | -1.238160 | -4.905866 | -0.772182 |
|  |  | C | -2.507652 | -5.526599 | -1.039264 |
|  |  | C | -3.693250 | -4.864123 | -0.806053 |
|  |  | C | 3.710843  | -3.521162 | -0.303619 |
|  |  | C | 4.901549  | -2.795504 | -0.090885 |
|  |  | C | 4.901893  | -1.426228 | 0.248283  |
|  |  | C | 3.660227  | -0.724525 | 0.505689  |
|  |  | C | 3.686648  | -4.868909 | -0.806245 |
|  |  | C | 2.500179  | -5.529853 | -1.039374 |
|  |  | C | 4.905363  | 2.789061  | -0.090691 |
|  |  | C | 4.903842  | 1.419752  | 0.248417  |
|  |  | C | 3.661232  | 0.719711  | 0.505750  |
|  |  | C | 6.138912  | 0.680816  | 0.243907  |
|  |  | C | 6.137963  | -0.688990 | 0.243807  |
|  |  | O | -1.302697 | 0.000853  | 1.924291  |
|  |  | O | 1.302715  | -0.000872 | 1.924278  |
|  |  | H | 2.507470  | -6.555228 | -1.440815 |
|  |  | H | -0.004398 | -6.560926 | -1.441707 |
|  |  | H | -2.516288 | -6.551973 | -1.440689 |
|  |  | H | -4.654288 | -5.358525 | -1.017362 |
|  |  | H | 5.868062  | -3.289198 | -0.280179 |
|  |  | H | -5.872552 | -3.281444 | -0.279954 |

|  |       |                                 |
|--|-------|---------------------------------|
|  |       | H 7.081714 -1.249947 0.159475   |
|  |       | H -7.083435 -1.240488 0.159696  |
|  |       | H 2.516274 6.551987 -1.440645   |
|  |       | H 0.004385 6.560940 -1.441641   |
|  |       | H -2.507483 6.555242 -1.440726  |
|  |       | H -4.647025 5.364555 -1.017579  |
|  |       | H 4.654279 5.358535 -1.017350   |
|  |       | H 5.872550 3.281447 -0.279973   |
|  |       | H -5.868065 3.289202 -0.280091  |
|  |       | H 7.083437 1.240486 0.159644    |
|  |       | H -7.081713 1.249945 0.159553   |
|  |       | H 4.647015 -5.364545 -1.017676  |
|  | int1' | N 2.060073 0.452679 2.618257    |
|  |       | C 1.957612 -2.068870 -0.261470  |
|  |       | C 0.927458 -1.045623 -0.495973  |
|  |       | C -0.463402 -1.370876 0.038816  |
|  |       | O -0.398601 -1.271429 1.476022  |
|  |       | N 1.945366 -0.680605 3.149448   |
|  |       | C 1.556093 -3.419265 -0.191033  |
|  |       | C 2.566661 -4.439833 -0.114018  |
|  |       | C 3.925355 -4.054666 -0.055345  |
|  |       | C 4.325921 -2.700941 -0.083554  |
|  |       | C 3.316642 -1.681937 -0.200797  |
|  |       | C 3.701561 -0.279577 -0.228171  |
|  |       | C 5.088910 0.089570 -0.132498   |
|  |       | C 6.071788 -0.963879 -0.031766  |
|  |       | C 5.708215 -2.290052 -0.008084  |
|  |       | C 1.313355 0.381021 -0.517203   |
|  |       | C 2.725853 0.747305 -0.307350   |
|  |       | C 3.066579 2.120281 -0.266688   |
|  |       | C 4.457720 2.484475 -0.209235   |
|  |       | C 5.430064 1.460697 -0.142696   |
|  |       | C -0.859673 -2.800038 -0.207915 |
|  |       | C 0.146595 -3.780719 -0.237038  |
|  |       | C -0.228236 -5.169409 -0.248209 |
|  |       | C 0.816815 -6.165046 -0.204763  |
|  |       | C 2.145521 -5.820677 -0.126377  |
|  |       | C -2.225672 -3.131758 -0.195476 |
|  |       | C -2.607380 -4.519125 -0.212406 |
|  |       | C -1.598380 -5.504415 -0.248584 |
|  |       | C -1.518351 -0.371945 -0.423434 |
|  |       | C -2.914098 -0.736813 -0.142891 |
|  |       | C -3.252498 -2.104007 -0.097934 |
|  |       | C -4.637567 -2.471865 0.014731  |
|  |       | C -4.976069 -3.875316 -0.015613 |
|  |       | C -4.011939 -4.847516 -0.136530 |
|  |       | C -3.881138 0.285439 -0.020624  |
|  |       | C -5.262891 -0.082773 0.128171  |
|  |       | C -5.608381 -1.452229 0.128147  |
|  |       | C -3.497601 1.687096 -0.016622  |
|  |       | C -2.144773 2.075108 -0.136759  |
|  |       | C -1.129720 1.050701 -0.418421  |

|  |      |   |           |           |           |
|--|------|---|-----------|-----------|-----------|
|  |      | C | 0.293332  | 1.375114  | 0.045707  |
|  |      | C | -4.500013 | 2.706544  | 0.135845  |
|  |      | C | -5.878351 | 2.297015  | 0.269807  |
|  |      | C | -6.241079 | 0.970787  | 0.265691  |
|  |      | C | -1.741217 | 3.425034  | -0.094830 |
|  |      | C | -0.336028 | 3.789427  | -0.207578 |
|  |      | C | 0.671539  | 2.807151  | -0.232403 |
|  |      | C | 2.035501  | 3.146375  | -0.294838 |
|  |      | O | 1.094969  | -0.337129 | -1.750097 |
|  |      | C | -2.746896 | 4.445539  | 0.023673  |
|  |      | C | -4.100976 | 4.061239  | 0.141050  |
|  |      | C | -2.326009 | 5.826254  | -0.008656 |
|  |      | C | -1.003037 | 6.174676  | -0.142255 |
|  |      | C | 0.039114  | 5.178511  | -0.231420 |
|  |      | C | 1.407892  | 5.517494  | -0.293679 |
|  |      | C | 2.417733  | 4.533225  | -0.314650 |
|  |      | C | 4.796012  | 3.887735  | -0.240709 |
|  |      | C | 3.824540  | 4.859004  | -0.304981 |
|  |      | O | -1.351362 | 0.352327  | -1.669059 |
|  |      | O | 0.283160  | 1.239450  | 1.457467  |
|  |      | H | -4.299833 | -5.910364 | -0.157471 |
|  |      | H | -1.889088 | -6.567350 | -0.243367 |
|  |      | H | 0.523568  | -7.226637 | -0.216839 |
|  |      | H | 2.918313  | -6.603694 | -0.078868 |
|  |      | H | -6.038092 | -4.157851 | 0.057586  |
|  |      | H | -6.669725 | -1.734756 | 0.217513  |
|  |      | H | 4.698131  | -4.837632 | 0.007606  |
|  |      | H | -7.300070 | 0.688172  | 0.373882  |
|  |      | H | 6.480065  | -3.071451 | 0.072844  |
|  |      | H | -0.711793 | 7.236516  | -0.167307 |
|  |      | H | 1.696398  | 6.580965  | -0.297358 |
|  |      | H | 4.111897  | 5.922054  | -0.330403 |
|  |      | H | 5.860153  | 4.170016  | -0.216724 |
|  |      | H | -3.097163 | 6.608656  | 0.070681  |
|  |      | H | -4.871047 | 4.844026  | 0.233494  |
|  |      | H | 6.494230  | 1.743062  | -0.095202 |
|  |      | H | -6.646145 | 3.078860  | 0.380710  |
|  |      | H | 7.134335  | -0.681449 | 0.030702  |
|  |      | H | -0.225291 | -0.278352 | 1.642854  |
|  |      | H | 2.352821  | -1.378775 | 2.500609  |
|  |      | H | 1.629460  | 1.262427  | 3.077095  |
|  |      | H | 2.527425  | 0.641405  | 1.708390  |
|  | ts2' | N | 2.136841  | 0.421249  | 2.610143  |
|  |      | C | 1.935430  | -2.085785 | -0.255075 |
|  |      | C | 0.913983  | -1.054092 | -0.488144 |
|  |      | C | -0.480876 | -1.368410 | 0.041855  |
|  |      | O | -0.420458 | -1.280808 | 1.479448  |
|  |      | N | 2.011314  | -0.640230 | 3.268486  |
|  |      | C | 1.521578  | -3.432614 | -0.189115 |
|  |      | C | 2.522691  | -4.462249 | -0.112805 |
|  |      | C | 3.885001  | -4.089384 | -0.051736 |
|  |      | C | 4.297830  | -2.739458 | -0.080485 |

|  |  |   |           |           |           |
|--|--|---|-----------|-----------|-----------|
|  |  | C | 3.297658  | -1.711142 | -0.197003 |
|  |  | C | 3.696264  | -0.312633 | -0.233415 |
|  |  | C | 5.088202  | 0.044246  | -0.143460 |
|  |  | C | 6.060760  | -1.018548 | -0.039976 |
|  |  | C | 5.684274  | -2.341069 | -0.009907 |
|  |  | C | 1.313413  | 0.368444  | -0.516062 |
|  |  | C | 2.730556  | 0.723217  | -0.315425 |
|  |  | C | 3.083426  | 2.092071  | -0.279723 |
|  |  | C | 4.477718  | 2.444092  | -0.228706 |
|  |  | C | 5.441798  | 1.411878  | -0.160761 |
|  |  | C | -0.889017 | -2.792596 | -0.213265 |
|  |  | C | 0.108929  | -3.781656 | -0.241160 |
|  |  | C | -0.278468 | -5.166844 | -0.256749 |
|  |  | C | 0.757615  | -6.171680 | -0.212820 |
|  |  | C | 2.089203  | -5.839191 | -0.129834 |
|  |  | C | -2.257906 | -3.111705 | -0.202763 |
|  |  | C | -2.652101 | -4.495453 | -0.223423 |
|  |  | C | -1.651737 | -5.489544 | -0.260952 |
|  |  | C | -1.524853 | -0.358398 | -0.420353 |
|  |  | C | -2.924203 | -0.710447 | -0.141706 |
|  |  | C | -3.275153 | -2.074616 | -0.101445 |
|  |  | C | -4.663494 | -2.429971 | 0.010948  |
|  |  | C | -5.014821 | -3.830183 | -0.023997 |
|  |  | C | -4.059752 | -4.810919 | -0.148520 |
|  |  | C | -3.881493 | 0.320493  | -0.016586 |
|  |  | C | -5.266410 | -0.035353 | 0.133095  |
|  |  | C | -5.624583 | -1.401597 | 0.129257  |
|  |  | C | -3.485087 | 1.718583  | -0.010881 |
|  |  | C | -2.129169 | 2.094639  | -0.133978 |
|  |  | C | -1.123878 | 1.061179  | -0.417532 |
|  |  | C | 0.301479  | 1.373033  | 0.047270  |
|  |  | C | -4.477565 | 2.746977  | 0.146162  |
|  |  | C | -5.859309 | 2.349800  | 0.282766  |
|  |  | C | -6.234358 | 1.026993  | 0.275737  |
|  |  | C | -1.712804 | 3.440555  | -0.090630 |
|  |  | C | -0.304420 | 3.792574  | -0.207656 |
|  |  | C | 0.694289  | 2.801731  | -0.234395 |
|  |  | C | 2.061120  | 3.127343  | -0.303829 |
|  |  | O | 1.085006  | -0.349220 | -1.746546 |
|  |  | C | -2.708670 | 4.470104  | 0.032119  |
|  |  | C | -4.065914 | 4.097945  | 0.152851  |
|  |  | C | -2.275104 | 5.846962  | -0.000521 |
|  |  | C | -0.949645 | 6.183631  | -0.139836 |
|  |  | C | 0.083147  | 5.178254  | -0.234059 |
|  |  | C | 1.454646  | 5.504296  | -0.302934 |
|  |  | C | 2.455492  | 4.510733  | -0.328050 |
|  |  | C | 4.828331  | 3.843980  | -0.264752 |
|  |  | C | 3.865091  | 4.823793  | -0.326095 |
|  |  | O | -1.351224 | 0.364328  | -1.666703 |
|  |  | O | 0.292949  | 1.231971  | 1.455024  |
|  |  | H | -4.357758 | -5.870912 | -0.172615 |
|  |  | H | -1.951994 | -6.549847 | -0.258939 |

|         |     |                                 |
|---------|-----|---------------------------------|
|         |     | H 0.455123 -7.230646 -0.228518  |
|         |     | H 2.854747 -6.629340 -0.082718  |
|         |     | H -6.079378 -4.103088 0.048924  |
|         |     | H -6.688402 -1.674354 0.219490  |
|         |     | H 4.650627 -4.879455 0.010154   |
|         |     | H -7.295709 0.754111 0.385737   |
|         |     | H 6.448984 -3.129491 0.071133   |
|         |     | H -0.648980 7.242825 -0.165413  |
|         |     | H 1.753152 6.564997 -0.308289   |
|         |     | H 4.161975 5.884133 -0.354645   |
|         |     | H 5.895001 4.116906 -0.245963   |
|         |     | H -3.038656 6.636368 0.082815   |
|         |     | H -4.828414 4.887669 0.248927   |
|         |     | H 6.508522 1.684938 -0.117280   |
|         |     | H -6.619496 3.138429 0.397937   |
|         |     | H 7.126268 -0.746461 0.017807   |
|         |     | H -0.229131 -0.295384 1.653643  |
|         |     | H 2.519948 -1.391516 2.762570   |
|         |     | H 1.554363 1.249926 2.841230    |
|         |     | H 2.651889 0.498444 1.706170    |
| Route 3 | SC3 | C 3.927439 -4.017198 -0.417697  |
|         |     | C 2.569443 -4.411417 -0.339046  |
|         |     | C 1.554355 -3.397378 -0.175496  |
|         |     | C 1.948094 -2.046051 -0.135129  |
|         |     | C 3.306687 -1.641611 -0.312097  |
|         |     | C 4.322445 -2.666770 -0.406948  |
|         |     | C 0.951792 -1.037412 0.227585   |
|         |     | C -0.499706 -1.436068 0.300530  |
|         |     | C -0.871710 -2.817881 -0.009125 |
|         |     | C 0.148781 -3.781879 -0.116824  |
|         |     | C -1.482711 -0.364202 -0.030783 |
|         |     | C -2.919131 -0.753852 -0.205374 |
|         |     | C -3.276372 -2.172899 -0.066875 |
|         |     | C -2.256623 -3.162683 -0.081839 |
|         |     | C -1.177049 1.048488 0.337750   |
|         |     | C -2.200695 2.057802 0.059328   |
|         |     | C -3.569611 1.653808 -0.015784  |
|         |     | C -3.946089 0.283486 -0.033015  |
|         |     | C -4.589769 2.679607 -0.043435  |
|         |     | C -4.196358 4.030045 -0.083854  |
|         |     | C -2.836071 4.423375 -0.105823  |
|         |     | C -1.811806 3.408841 -0.019563  |
|         |     | C -0.406321 3.793247 -0.078826  |
|         |     | C -0.048048 5.185536 -0.215816  |
|         |     | C -1.099326 6.160047 -0.256402  |
|         |     | C -2.431516 5.795651 -0.205041  |
|         |     | C 0.275667 1.445420 0.266941    |
|         |     | C 0.618811 2.828590 -0.065939   |
|         |     | C 1.993269 3.174160 -0.245423   |
|         |     | C 2.347522 4.575197 -0.314864   |
|         |     | C 1.321292 5.537840 -0.297625   |
|         |     | C -5.311720 -0.117071 0.008969  |

|  |     |   |           |           |           |
|--|-----|---|-----------|-----------|-----------|
|  |     | C | -6.312398 | 0.924801  | 0.028255  |
|  |     | C | -5.966758 | 2.256507  | -0.017034 |
|  |     | C | -4.655951 | -2.522025 | -0.023550 |
|  |     | C | -5.640081 | -1.498559 | -0.001302 |
|  |     | C | -2.614879 | -4.563399 | -0.140241 |
|  |     | C | -4.015900 | -4.898366 | -0.112261 |
|  |     | C | -4.989167 | -3.927762 | -0.036614 |
|  |     | C | -0.218939 | -5.173811 | -0.232135 |
|  |     | C | -1.590536 | -5.525808 | -0.209789 |
|  |     | C | 1.223997  | 0.376233  | -0.159817 |
|  |     | C | 2.158477  | -5.783628 | -0.408355 |
|  |     | C | 0.826095  | -6.147788 | -0.358808 |
|  |     | C | 3.679144  | -0.271687 | -0.355808 |
|  |     | C | 2.642384  | 0.765932  | -0.448086 |
|  |     | C | 3.010042  | 2.183487  | -0.318954 |
|  |     | C | 5.697870  | -2.244123 | -0.471630 |
|  |     | C | 6.044764  | -0.912691 | -0.446509 |
|  |     | C | 5.044350  | 0.127922  | -0.398928 |
|  |     | C | 5.372227  | 1.509146  | -0.420714 |
|  |     | C | 4.389862  | 2.532678  | -0.367477 |
|  |     | C | 3.747167  | 4.909728  | -0.384669 |
|  |     | C | 4.722473  | 3.938352  | -0.387866 |
|  |     | O | -1.998040 | -0.486503 | -1.352749 |
|  |     | O | 0.292397  | -1.266778 | 1.494438  |
|  |     | O | -0.399524 | 1.276009  | 1.531693  |
|  |     | O | 1.631530  | 0.507762  | -1.517949 |
|  |     | N | 2.999001  | -0.786289 | 3.194714  |
|  |     | N | 2.555941  | 0.583089  | 3.129670  |
|  |     | H | -6.052142 | -4.213548 | -0.005566 |
|  |     | H | -6.702518 | -1.788448 | 0.011688  |
|  |     | H | -7.373108 | 0.630694  | 0.058953  |
|  |     | H | -6.750851 | 3.029682  | -0.027936 |
|  |     | H | -4.299339 | -5.961939 | -0.147001 |
|  |     | H | -1.863819 | -6.592155 | -0.258749 |
|  |     | H | -4.973357 | 4.810906  | -0.109890 |
|  |     | H | 0.544626  | -7.210215 | -0.427780 |
|  |     | H | -3.214120 | 6.569024  | -0.251374 |
|  |     | H | 7.104923  | -0.617461 | -0.480591 |
|  |     | H | 6.433452  | 1.798801  | -0.472370 |
|  |     | H | 5.785309  | 4.223412  | -0.426571 |
|  |     | H | 4.028388  | 5.973555  | -0.427090 |
|  |     | H | 6.479714  | -3.017125 | -0.532271 |
|  |     | H | 4.700977  | -4.797818 | -0.497290 |
|  |     | H | 1.590383  | 6.604618  | -0.358058 |
|  |     | H | 2.935136  | -6.556897 | -0.515829 |
|  |     | H | -0.823919 | 7.222761  | -0.342867 |
|  |     | H | 2.992745  | -1.050540 | 4.181530  |
|  |     | H | 2.337780  | -1.410580 | 2.720490  |
|  |     | H | 3.023097  | 1.015749  | 2.330199  |
|  |     | H | 1.545900  | 0.644567  | 2.963200  |
|  | ts1 | C | -1.033524 | 5.587956  | -0.289833 |
|  |     | C | 0.310359  | 5.172736  | -0.216964 |

|  |  |   |           |           |           |
|--|--|---|-----------|-----------|-----------|
|  |  | C | 0.611848  | 3.765410  | -0.091585 |
|  |  | C | -0.457077 | 2.848360  | -0.040086 |
|  |  | C | -1.814742 | 3.257703  | -0.200514 |
|  |  | C | -2.103528 | 4.665410  | -0.296845 |
|  |  | C | -0.173490 | 1.438856  | 0.254477  |
|  |  | C | 1.246374  | 0.974468  | 0.213222  |
|  |  | C | 2.324615  | 1.949463  | -0.020495 |
|  |  | C | 1.991587  | 3.317495  | -0.060509 |
|  |  | C | 1.458312  | -0.441412 | -0.234082 |
|  |  | C | 2.935758  | -0.884426 | -0.327577 |
|  |  | C | 3.985535  | 0.100996  | -0.031461 |
|  |  | C | 3.667791  | 1.488760  | -0.040235 |
|  |  | C | 0.445533  | -1.450211 | -0.081256 |
|  |  | C | 0.743542  | -2.775372 | -0.162714 |
|  |  | C | 2.132853  | -3.226886 | -0.174458 |
|  |  | C | 3.196791  | -2.316381 | -0.138680 |
|  |  | C | 2.410703  | -4.653049 | -0.132959 |
|  |  | C | 1.352780  | -5.564970 | -0.190836 |
|  |  | C | -0.015420 | -5.143746 | -0.235657 |
|  |  | C | -0.330188 | -3.761842 | -0.177194 |
|  |  | C | -1.695908 | -3.330560 | -0.205431 |
|  |  | C | -2.764609 | -4.292116 | -0.355984 |
|  |  | C | -2.413491 | -5.680545 | -0.423687 |
|  |  | C | -1.097282 | -6.095054 | -0.353727 |
|  |  | C | -0.926456 | -1.015547 | 0.462466  |
|  |  | C | -2.012974 | -1.957072 | -0.069001 |
|  |  | C | -3.349206 | -1.505608 | -0.205457 |
|  |  | C | -4.416530 | -2.470244 | -0.352071 |
|  |  | C | -4.097266 | -3.838215 | -0.407736 |
|  |  | C | 4.567562  | -2.733476 | 0.018828  |
|  |  | C | 4.819583  | -4.153835 | 0.054174  |
|  |  | C | 3.790844  | -5.063519 | -0.042587 |
|  |  | C | 5.315402  | -0.362610 | 0.099917  |
|  |  | C | 5.578597  | -1.770986 | 0.098230  |
|  |  | C | 4.733416  | 2.465209  | -0.006593 |
|  |  | C | 6.084421  | 1.977626  | 0.095605  |
|  |  | C | 6.361686  | 0.629416  | 0.171496  |
|  |  | C | 3.062029  | 4.285765  | -0.106942 |
|  |  | C | 4.401563  | 3.834129  | -0.054340 |
|  |  | C | -1.184995 | 0.402022  | -0.090076 |
|  |  | C | 1.413297  | 6.100503  | -0.253474 |
|  |  | C | 2.719098  | 5.677664  | -0.195997 |
|  |  | C | -2.877420 | 2.304181  | -0.251699 |
|  |  | C | -2.566596 | 0.867864  | -0.348707 |
|  |  | C | -3.668956 | -0.101778 | -0.214821 |
|  |  | C | -3.485188 | 5.065164  | -0.372417 |
|  |  | C | -4.504446 | 4.140089  | -0.376953 |
|  |  | C | -4.238372 | 2.720560  | -0.335815 |
|  |  | C | -5.273615 | 1.756212  | -0.408879 |
|  |  | C | -5.016090 | 0.362705  | -0.349187 |
|  |  | C | -5.769143 | -1.978553 | -0.442559 |
|  |  | C | -6.062228 | -0.631989 | -0.426591 |



|  |      |                                 |
|--|------|---------------------------------|
|  |      | O 2.153685 -0.528041 -1.495204  |
|  |      | O 0.568848 1.175178 1.467799    |
|  |      | O -0.959507 -1.082713 1.918634  |
|  |      | O -1.607865 0.513635 -1.454734  |
|  |      | N -3.415049 0.473849 2.656229   |
|  |      | N -2.607547 -0.444786 3.146084  |
|  |      | H 7.403903 0.285156 0.260611    |
|  |      | H 6.623920 -2.102840 0.180074   |
|  |      | H 5.863264 -4.501789 0.145333   |
|  |      | H 4.014149 -6.148871 -0.023612  |
|  |      | H 6.905178 2.711316 0.124297    |
|  |      | H 5.212638 4.579997 -0.048088   |
|  |      | H 1.575639 -6.644114 -0.196460  |
|  |      | H 3.535827 6.415736 -0.228036   |
|  |      | H -0.848765 -7.161317 -0.404453 |
|  |      | H -5.552464 4.473909 -0.436597  |
|  |      | H -6.316638 2.099251 -0.505840  |
|  |      | H -7.106462 -0.295302 -0.502091 |
|  |      | H -6.586371 -2.712743 -0.534545 |
|  |      | H -3.716213 6.140642 -0.432046  |
|  |      | H -1.254222 6.665708 -0.352476  |
|  |      | H -4.914812 -4.579535 -0.501787 |
|  |      | H 1.178209 7.174886 -0.333934   |
|  |      | H -3.213692 -6.422666 -0.526011 |
|  |      | H -2.969554 1.374273 2.444280   |
|  |      | H -4.190950 0.176940 1.935804   |
|  |      | H -3.147734 -1.326387 3.157746  |
|  |      | H -1.561849 -0.784459 2.319216  |
|  | int1 | C -0.003280 5.712909 -0.128041  |
|  |      | C 1.249784 5.068933 -0.064207   |
|  |      | C 1.295641 3.627936 0.018002    |
|  |      | C 0.085033 2.907975 0.056951    |
|  |      | C -1.177646 3.549910 -0.106806  |
|  |      | C -1.217430 4.992963 -0.172060  |
|  |      | C 0.128970 1.463894 0.308926    |
|  |      | C 1.443721 0.760548 0.206234    |
|  |      | C 2.665267 1.539432 -0.020631   |
|  |      | C 2.582954 2.945107 0.005352    |
|  |      | C 1.389807 -0.660105 -0.238794  |
|  |      | C 2.771551 -1.357181 -0.360172  |
|  |      | C 3.979182 -0.569006 -0.084874  |
|  |      | C 3.914156 0.855582 -0.062901   |
|  |      | C 0.220247 -1.469017 0.045840   |
|  |      | C 0.288375 -2.845517 -0.090075  |
|  |      | C 1.576439 -3.524195 -0.158424  |
|  |      | C 2.784661 -2.806752 -0.164684  |
|  |      | C 1.608689 -4.973217 -0.108065  |
|  |      | C 0.406929 -5.691536 -0.121288  |
|  |      | C -0.865231 -5.047075 -0.152196 |
|  |      | C -0.931527 -3.625478 -0.092381 |
|  |      | C -2.203233 -2.961001 -0.140659 |
|  |      | C -3.412342 -3.726609 -0.318407 |

|  |  |   |           |           |           |
|--|--|---|-----------|-----------|-----------|
|  |  | C | -3.313173 | -5.158063 | -0.352555 |
|  |  | C | -2.091583 | -5.791235 | -0.258138 |
|  |  | C | -1.066823 | -0.796815 | 0.462996  |
|  |  | C | -2.283662 | -1.547817 | -0.037822 |
|  |  | C | -3.503677 | -0.867848 | -0.273648 |
|  |  | C | -4.716591 | -1.637948 | -0.445651 |
|  |  | C | -4.645299 | -3.042578 | -0.439055 |
|  |  | C | 4.059856  | -3.457039 | -0.010040 |
|  |  | C | 4.065034  | -4.899844 | 0.038038  |
|  |  | C | 2.896771  | -5.620101 | -0.030923 |
|  |  | C | 5.211816  | -1.253331 | 0.061988  |
|  |  | C | 5.230385  | -2.683343 | 0.068469  |
|  |  | C | 5.131493  | 1.629088  | 0.005996  |
|  |  | C | 6.375801  | 0.915917  | 0.106919  |
|  |  | C | 6.412567  | -0.461268 | 0.161583  |
|  |  | C | 3.804311  | 3.714206  | -0.018341 |
|  |  | C | 5.042695  | 3.038450  | 0.006197  |
|  |  | C | -1.056076 | 0.638049  | -0.065127 |
|  |  | C | 2.493688  | 5.796185  | -0.076383 |
|  |  | C | 3.709258  | 5.151640  | -0.045574 |
|  |  | C | -2.387984 | 2.802052  | -0.222047 |
|  |  | C | -2.329409 | 1.333683  | -0.337828 |
|  |  | C | -3.583295 | 0.563780  | -0.264042 |
|  |  | C | -2.502605 | 5.625767  | -0.284776 |
|  |  | C | -3.664858 | 4.887626  | -0.362340 |
|  |  | C | -3.644052 | 3.446523  | -0.356611 |
|  |  | C | -4.835665 | 2.665564  | -0.519305 |
|  |  | C | -4.822240 | 1.260371  | -0.498225 |
|  |  | C | -5.961031 | -0.920037 | -0.606301 |
|  |  | C | -6.016798 | 0.456114  | -0.631313 |
|  |  | O | 2.014604  | -0.888235 | -1.508764 |
|  |  | O | 0.831064  | 1.022899  | 1.488480  |
|  |  | O | -1.105738 | -0.790687 | 1.907171  |
|  |  | O | -1.422944 | 0.837250  | -1.433978 |
|  |  | N | -4.064698 | 0.506967  | 2.185673  |
|  |  | N | -3.754075 | -0.642548 | 2.733301  |
|  |  | H | 7.376716  | -0.983197 | 0.265845  |
|  |  | H | 6.201241  | -3.195732 | 0.159738  |
|  |  | H | 5.032417  | -5.418242 | 0.128351  |
|  |  | H | 2.923523  | -6.720697 | -0.002218 |
|  |  | H | 7.310510  | 1.495694  | 0.161044  |
|  |  | H | 5.971359  | 3.630674  | 0.039565  |
|  |  | H | 0.441567  | -6.792762 | -0.113454 |
|  |  | H | 4.643077  | 5.735387  | -0.054524 |
|  |  | H | -2.035924 | -6.890709 | -0.288367 |
|  |  | H | -4.636003 | 5.398111  | -0.458594 |
|  |  | H | -5.793413 | 3.189207  | -0.665727 |
|  |  | H | -6.981460 | 0.968145  | -0.773897 |
|  |  | H | -6.884817 | -1.507891 | -0.727324 |
|  |  | H | -2.544467 | 6.725746  | -0.320162 |
|  |  | H | -0.035252 | 6.813709  | -0.166611 |
|  |  | H | -5.571857 | -3.628102 | -0.553713 |

|  |     |                                 |
|--|-----|---------------------------------|
|  |     | H 2.453475 6.896032 -0.115763   |
|  |     | H -4.236622 -5.748099 -0.461696 |
|  |     | H -3.433395 1.285967 2.372901   |
|  |     | H -4.997124 0.744723 1.837923   |
|  |     | H -4.496931 -1.311065 2.482607  |
|  |     | H -2.048519 -0.925146 2.201304  |
|  | ts2 | C 0.335410 5.715120 -0.141666   |
|  |     | C 1.548680 4.998491 -0.082142   |
|  |     | C 1.510041 3.557429 0.000842    |
|  |     | C 0.259313 2.910063 0.036030    |
|  |     | C -0.964450 3.625639 -0.116578  |
|  |     | C -0.919743 5.068639 -0.175646  |
|  |     | C 0.217275 1.465648 0.284703    |
|  |     | C 1.488213 0.686453 0.201311    |
|  |     | C 2.755585 1.392061 -0.016354   |
|  |     | C 2.755216 2.800217 -0.000979   |
|  |     | C 1.356108 -0.729747 -0.238744  |
|  |     | C 2.695912 -1.505902 -0.347421  |
|  |     | C 3.944765 -0.789501 -0.061814  |
|  |     | C 3.962765 0.636554 -0.045522   |
|  |     | C 0.138120 -1.467198 0.038138   |
|  |     | C 0.127028 -2.845182 -0.106769  |
|  |     | C 1.373811 -3.598479 -0.162604  |
|  |     | C 2.622190 -2.953357 -0.152324  |
|  |     | C 1.320749 -5.047086 -0.119475  |
|  |     | C 0.079417 -5.693852 -0.154049  |
|  |     | C -1.152139 -4.975417 -0.198676 |
|  |     | C -1.135265 -3.553121 -0.131774 |
|  |     | C -2.364531 -2.813139 -0.187785 |
|  |     | C -3.616465 -3.506031 -0.372606 |
|  |     | C -3.600259 -4.940626 -0.421187 |
|  |     | C -2.418950 -5.645575 -0.323840 |
|  |     | C -1.111412 -0.715715 0.432051  |
|  |     | C -2.363115 -1.399345 -0.073225 |
|  |     | C -3.544628 -0.645879 -0.293323 |
|  |     | C -4.801795 -1.344289 -0.452190 |
|  |     | C -4.808889 -2.751474 -0.471991 |
|  |     | C 3.855313 -3.677217 0.016092   |
|  |     | C 3.775269 -5.117931 0.060633   |
|  |     | C 2.567898 -5.768220 -0.027200  |
|  |     | C 5.133496 -1.544387 0.098917   |
|  |     | C 5.068089 -2.973185 0.107750   |
|  |     | C 5.222709 1.337667 0.028777    |
|  |     | C 6.422040 0.553321 0.145339    |
|  |     | C 6.377535 -0.823498 0.207372   |
|  |     | C 4.019665 3.496487 -0.021316   |
|  |     | C 5.216256 2.749928 0.017907    |
|  |     | C -1.013232 0.713494 -0.097003  |
|  |     | C 2.833179 5.651403 -0.095899   |
|  |     | C 4.008870 4.937004 -0.058459   |
|  |     | C -2.217974 2.950989 -0.216561  |
|  |     | C -2.247383 1.483192 -0.342847  |

|  |                                      |   |           |           |           |
|--|--------------------------------------|---|-----------|-----------|-----------|
|  |                                      | C | -3.540182 | 0.783116  | -0.261104 |
|  |                                      | C | -2.166749 | 5.776777  | -0.267558 |
|  |                                      | C | -3.371995 | 5.108811  | -0.322124 |
|  |                                      | C | -3.436499 | 3.668944  | -0.317762 |
|  |                                      | C | -4.675363 | 2.959658  | -0.442712 |
|  |                                      | C | -4.742595 | 1.555042  | -0.428539 |
|  |                                      | C | -6.007822 | -0.554438 | -0.556816 |
|  |                                      | C | -5.986104 | 0.823153  | -0.537708 |
|  |                                      | O | 1.977384  | -0.995899 | -1.503073 |
|  |                                      | O | 0.875585  | 0.985617  | 1.475997  |
|  |                                      | O | -1.198417 | -0.641269 | 1.884104  |
|  |                                      | O | -1.380306 | 0.945623  | -1.457517 |
|  |                                      | N | -4.056642 | 0.468710  | 2.290132  |
|  |                                      | N | -3.881924 | -0.773146 | 2.647975  |
|  |                                      | H | 7.308394  | -1.400476 | 0.323134  |
|  |                                      | H | 6.006415  | -3.541263 | 0.209103  |
|  |                                      | H | 4.709437  | -5.692184 | 0.162002  |
|  |                                      | H | 2.529798  | -6.868598 | -0.002611 |
|  |                                      | H | 7.388576  | 1.077749  | 0.204715  |
|  |                                      | H | 6.177577  | 3.287324  | 0.054325  |
|  |                                      | H | 0.049289  | -6.795228 | -0.152468 |
|  |                                      | H | 4.975342  | 5.464958  | -0.067671 |
|  |                                      | H | -2.427621 | -6.746096 | -0.363300 |
|  |                                      | H | -4.313213 | 5.675841  | -0.396592 |
|  |                                      | H | -5.605806 | 3.538432  | -0.553375 |
|  |                                      | H | -6.924069 | 1.392549  | -0.632879 |
|  |                                      | H | -6.966823 | -1.085811 | -0.664854 |
|  |                                      | H | -2.143811 | 6.877348  | -0.301242 |
|  |                                      | H | 0.368426  | 6.815926  | -0.179501 |
|  |                                      | H | -5.768742 | -3.281842 | -0.582014 |
|  |                                      | H | 2.857559  | 6.751546  | -0.140405 |
|  |                                      | H | -4.556206 | -5.474283 | -0.540626 |
|  |                                      | H | -3.279635 | 1.108191  | 2.456726  |
|  |                                      | H | -4.921575 | 0.849477  | 1.899700  |
|  |                                      | H | -4.716089 | -1.301963 | 2.354418  |
|  |                                      | H | -2.071512 | -1.026191 | 2.149157  |
|  | 3E_1OH_N <sub>2</sub> H <sub>3</sub> | C | 2.423469  | -5.028559 | -0.342061 |
|  |                                      | C | 1.021906  | -5.005468 | -0.251517 |
|  |                                      | C | 0.347382  | -3.736706 | -0.114841 |
|  |                                      | C | 1.116979  | -2.556938 | -0.058723 |
|  |                                      | C | 2.529167  | -2.571445 | -0.219269 |
|  |                                      | C | 3.198758  | -3.841844 | -0.337624 |
|  |                                      | C | 0.440545  | -1.284070 | 0.219591  |
|  |                                      | C | -1.043829 | -1.233565 | 0.174116  |
|  |                                      | C | -1.805781 | -2.472886 | -0.034436 |
|  |                                      | C | -1.108569 | -3.695560 | -0.073625 |
|  |                                      | C | -1.649846 | 0.066755  | -0.229212 |
|  |                                      | C | -3.206387 | 0.073753  | -0.288218 |
|  |                                      | C | -3.922966 | -1.169915 | 0.009455  |
|  |                                      | C | -3.227652 | -2.416520 | -0.013494 |
|  |                                      | C | -0.953263 | 1.305191  | 0.048384  |
|  |                                      | C | -1.635726 | 2.509734  | -0.057269 |

|  |  |   |           |           |           |
|--|--|---|-----------|-----------|-----------|
|  |  | C | -3.092128 | 2.543184  | -0.078258 |
|  |  | C | -3.854454 | 1.363543  | -0.059721 |
|  |  | C | -3.766119 | 3.825975  | -0.000179 |
|  |  | C | -3.009819 | 5.000857  | -0.031278 |
|  |  | C | -1.582644 | 4.987870  | -0.097220 |
|  |  | C | -0.892799 | 3.748560  | -0.065719 |
|  |  | C | 0.547542  | 3.714575  | -0.128548 |
|  |  | C | 1.286290  | 4.949865  | -0.272175 |
|  |  | C | 0.551879  | 6.188274  | -0.298013 |
|  |  | C | -0.819567 | 6.207453  | -0.201386 |
|  |  | C | 0.507668  | 1.265105  | 0.422279  |
|  |  | C | 1.245710  | 2.494049  | -0.049604 |
|  |  | C | 2.653697  | 2.444594  | -0.196116 |
|  |  | C | 3.395042  | 3.679251  | -0.313946 |
|  |  | C | 2.689588  | 4.903719  | -0.341771 |
|  |  | C | -5.279779 | 1.377156  | 0.153202  |
|  |  | C | -5.926290 | 2.667031  | 0.226463  |
|  |  | C | -5.204635 | 3.831156  | 0.128999  |
|  |  | C | -5.321699 | -1.109216 | 0.218390  |
|  |  | C | -5.976945 | 0.163785  | 0.258100  |
|  |  | C | -3.971667 | -3.650379 | 0.061642  |
|  |  | C | -5.396277 | -3.569290 | 0.232379  |
|  |  | C | -6.039058 | -2.353646 | 0.337624  |
|  |  | C | -1.862312 | -4.926125 | -0.098750 |
|  |  | C | -3.266773 | -4.873648 | -0.005047 |
|  |  | C | 1.144279  | -0.012125 | -0.122081 |
|  |  | C | 0.226714  | -6.212453 | -0.277863 |
|  |  | C | -1.142449 | -6.174456 | -0.194813 |
|  |  | C | 3.300954  | -1.356939 | -0.248147 |
|  |  | C | 2.599309  | -0.057421 | -0.340375 |
|  |  | C | 3.372511  | 1.196428  | -0.222684 |
|  |  | C | 4.627049  | -3.846217 | -0.433646 |
|  |  | C | 5.345405  | -2.664667 | -0.395001 |
|  |  | C | 4.693375  | -1.395094 | -0.303369 |
|  |  | C | 5.530354  | -0.135457 | -0.159583 |
|  |  | C | 4.760416  | 1.166617  | -0.259025 |
|  |  | C | 4.826196  | 3.611393  | -0.368778 |
|  |  | C | 5.486070  | 2.399701  | -0.308607 |
|  |  | O | -2.362000 | -0.000191 | -1.468332 |
|  |  | O | -0.339013 | -1.207994 | 1.455960  |
|  |  | O | 0.693581  | 1.284231  | 1.869602  |
|  |  | O | 1.619222  | -0.004983 | -1.469407 |
|  |  | N | 5.466446  | -0.201959 | 2.314719  |
|  |  | N | 6.271101  | -0.113578 | 1.145626  |
|  |  | H | -7.128549 | -2.317563 | 0.493513  |
|  |  | H | -7.069761 | 0.187470  | 0.393868  |
|  |  | H | -7.018937 | 2.698891  | 0.358807  |
|  |  | H | -5.716703 | 4.804919  | 0.177221  |
|  |  | H | -5.971745 | -4.505916 | 0.296165  |
|  |  | H | -3.833976 | -5.817663 | 0.029495  |
|  |  | H | -3.527988 | 5.972740  | -0.001496 |
|  |  | H | -1.723688 | -7.109642 | -0.210624 |

|  |      |                                 |
|--|------|---------------------------------|
|  |      | H -1.363170 7.164978 -0.217381  |
|  |      | H 6.445444 -2.695495 -0.456942  |
|  |      | H 6.332751 -0.142676 -0.930738  |
|  |      | H 6.585623 2.361372 -0.310216   |
|  |      | H 5.395420 4.550746 -0.447553   |
|  |      | H 5.148467 -4.810448 -0.536837  |
|  |      | H 2.938738 -5.999066 -0.422964  |
|  |      | H 3.256095 5.845900 -0.414827   |
|  |      | H 0.749865 -7.177387 -0.365574  |
|  |      | H 1.115516 7.129656 -0.391854   |
|  |      | H 5.077660 0.726687 2.491440    |
|  |      | H 4.669244 -0.841605 2.181800   |
|  |      | H 6.928874 -0.894834 1.175234   |
|  |      | H 0.200757 0.499422 2.192676    |
|  | SC3' | C -5.646156 -1.245788 -0.765495 |
|  |      | C -4.708160 -0.171253 -0.651348 |
|  |      | C -3.352145 -0.460850 -0.582859 |
|  |      | C -2.877134 -1.820324 -0.581121 |
|  |      | C -3.829174 -2.892257 -0.764446 |
|  |      | C -5.220911 -2.556765 -0.857643 |
|  |      | C -3.361681 -4.226089 -0.801848 |
|  |      | C -1.996180 -4.535707 -0.673293 |
|  |      | C -1.048894 -3.464484 -0.455965 |
|  |      | C -1.511726 -2.136917 -0.370653 |
|  |      | C -0.584901 -1.082000 0.178606  |
|  |      | C 0.859781 -1.382594 -0.121716  |
|  |      | C 1.312000 -2.690434 -0.238072  |
|  |      | C 0.354615 -3.768292 -0.325585  |
|  |      | C -0.947666 0.307551 -0.339310  |
|  |      | C -0.040332 1.415525 0.082894   |
|  |      | C 1.408551 1.089734 0.109352    |
|  |      | C 1.786332 -0.287769 -0.315729  |
|  |      | C 2.396431 2.171041 -0.012533   |
|  |      | C 1.940080 3.502884 -0.041757   |
|  |      | C 0.521332 3.815744 -0.154049   |
|  |      | C -0.454740 2.799200 -0.178970  |
|  |      | C -1.829542 3.080759 -0.404252  |
|  |      | C -2.246308 4.456146 -0.508493  |
|  |      | C -1.265487 5.476927 -0.434679  |
|  |      | C 0.101026 5.190822 -0.277407   |
|  |      | C 2.908460 4.571601 0.015899    |
|  |      | C 2.438044 5.934167 -0.070741   |
|  |      | C 1.105794 6.228440 -0.220706   |
|  |      | C -2.357135 0.629807 -0.618539  |
|  |      | C -2.810157 2.033377 -0.506979  |
|  |      | C -4.168458 2.329560 -0.615703  |
|  |      | C -4.569039 3.699960 -0.694112  |
|  |      | C -3.643299 4.727816 -0.666959  |
|  |      | C 3.315962 -0.583455 -0.296565  |
|  |      | C 4.231189 0.495737 0.085844    |
|  |      | C 3.779961 1.850115 0.076634    |
|  |      | C 4.733765 2.921053 0.234657    |

|  |     |   |           |           |           |
|--|-----|---|-----------|-----------|-----------|
|  |     | C | 4.271645  | 4.255513  | 0.178234  |
|  |     | C | 2.735812  | -2.994190 | -0.188594 |
|  |     | C | 3.700400  | -1.977810 | -0.086980 |
|  |     | C | 5.084188  | -2.262901 | 0.196899  |
|  |     | C | 5.986038  | -1.203871 | 0.383757  |
|  |     | C | 5.580779  | 0.169660  | 0.361378  |
|  |     | C | 6.507931  | 1.254590  | 0.563689  |
|  |     | C | 6.107243  | 2.571076  | 0.472659  |
|  |     | C | 0.803674  | -5.113642 | -0.366422 |
|  |     | C | 2.198187  | -5.394260 | -0.233504 |
|  |     | C | 3.155759  | -4.381876 | -0.124286 |
|  |     | C | 4.559258  | -4.658365 | 0.075298  |
|  |     | C | 5.476590  | -3.652251 | 0.252477  |
|  |     | C | -1.503642 | -5.888616 | -0.705746 |
|  |     | C | -0.166226 | -6.165951 | -0.546805 |
|  |     | C | -5.221507 | 1.245073  | -0.498777 |
|  |     | O | 0.640414  | 1.157111  | 1.355186  |
|  |     | O | 2.567746  | -0.317709 | -1.513242 |
|  |     | O | -0.839290 | -1.106224 | 1.625865  |
|  |     | N | -3.814438 | -1.944794 | 3.949072  |
|  |     | N | -3.829342 | -1.478948 | 2.584746  |
|  |     | O | -1.345966 | 0.426796  | -1.704357 |
|  |     | N | -5.929499 | 1.320734  | 0.829113  |
|  |     | N | -5.111502 | 1.273783  | 1.985350  |
|  |     | H | 7.561602  | 1.011771  | 0.772032  |
|  |     | H | 7.046408  | -1.434818 | 0.572691  |
|  |     | H | 6.535444  | -3.890555 | 0.438245  |
|  |     | H | 4.879504  | -5.711328 | 0.112028  |
|  |     | H | 6.841229  | 3.381908  | 0.600094  |
|  |     | H | 5.000499  | 5.076023  | 0.276053  |
|  |     | H | 2.525514  | -6.446083 | -0.213427 |
|  |     | H | 3.181567  | 6.744919  | -0.023444 |
|  |     | H | 0.190133  | -7.207556 | -0.569611 |
|  |     | H | -5.641040 | 3.935253  | -0.793961 |
|  |     | H | -6.023255 | 1.425870  | -1.248244 |
|  |     | H | -6.719385 | -1.004865 | -0.786549 |
|  |     | H | -5.951593 | -3.370628 | -0.984586 |
|  |     | H | -3.972111 | 5.774434  | -0.760622 |
|  |     | H | -1.587260 | 6.528293  | -0.505676 |
|  |     | H | -4.089303 | -5.044019 | -0.926356 |
|  |     | H | 0.775739  | 7.275998  | -0.299228 |
|  |     | H | -2.226461 | -6.705681 | -0.856072 |
|  |     | H | -4.813844 | 0.297553  | 2.155308  |
|  |     | H | -4.258192 | 1.840849  | 1.874003  |
|  |     | H | -6.469128 | 2.188187  | 0.864722  |
|  |     | H | -0.249168 | -0.408746 | 1.988397  |
|  |     | H | -4.262670 | -2.211717 | 2.019068  |
|  |     | H | -2.876505 | -1.339607 | 2.226025  |
|  |     | H | -3.861781 | -1.117636 | 4.547049  |
|  |     | H | -2.927062 | -2.414039 | 4.158645  |
|  | ts3 | C | -5.553574 | -1.849391 | -0.737730 |
|  |     | C | -4.725523 | -0.691185 | -0.659906 |

|  |  |   |           |           |           |
|--|--|---|-----------|-----------|-----------|
|  |  | C | -3.339451 | -0.843721 | -0.704505 |
|  |  | C | -2.738496 | -2.144186 | -0.716908 |
|  |  | C | -3.582893 | -3.306169 | -0.812234 |
|  |  | C | -5.001064 | -3.113908 | -0.852138 |
|  |  | C | -2.988438 | -4.594863 | -0.811770 |
|  |  | C | -1.601954 | -4.771736 | -0.680730 |
|  |  | C | -0.753827 | -3.609834 | -0.534194 |
|  |  | C | -1.329796 | -2.316984 | -0.545029 |
|  |  | C | -0.493978 | -1.182449 | -0.244296 |
|  |  | C | 0.915652  | -1.342238 | -0.253575 |
|  |  | C | 1.506035  | -2.617384 | -0.263854 |
|  |  | C | 0.662316  | -3.772347 | -0.359002 |
|  |  | C | -1.021257 | 0.167295  | -0.560912 |
|  |  | C | -0.230487 | 1.346162  | -0.098816 |
|  |  | C | 1.241751  | 1.173487  | -0.026560 |
|  |  | C | 1.777225  | -0.163432 | -0.406383 |
|  |  | C | 2.117465  | 2.346990  | -0.139962 |
|  |  | C | 1.533511  | 3.625889  | -0.198445 |
|  |  | C | 0.090568  | 3.795650  | -0.318357 |
|  |  | C | -0.778132 | 2.687278  | -0.348333 |
|  |  | C | -2.181205 | 2.835601  | -0.513880 |
|  |  | C | -2.740569 | 4.161457  | -0.570774 |
|  |  | C | -1.862037 | 5.273938  | -0.531704 |
|  |  | C | -0.468652 | 5.122826  | -0.421012 |
|  |  | C | 2.391290  | 4.785607  | -0.143074 |
|  |  | C | 1.787146  | 6.093168  | -0.240495 |
|  |  | C | 0.430422  | 6.253983  | -0.378595 |
|  |  | C | -2.468871 | 0.348929  | -0.770496 |
|  |  | C | -3.053700 | 1.694215  | -0.569952 |
|  |  | C | -4.439761 | 1.849488  | -0.563454 |
|  |  | C | -4.984623 | 3.171781  | -0.600033 |
|  |  | C | -4.166356 | 4.288256  | -0.636915 |
|  |  | C | 3.285621  | -0.316361 | -0.309735 |
|  |  | C | 4.097690  | 0.858558  | 0.042886  |
|  |  | C | 3.523529  | 2.162423  | -0.015625 |
|  |  | C | 4.367835  | 3.325393  | 0.120530  |
|  |  | C | 3.778453  | 4.606679  | 0.032118  |
|  |  | C | 2.942405  | -2.775301 | -0.128745 |
|  |  | C | 3.804005  | -1.663454 | -0.047262 |
|  |  | C | 5.201053  | -1.805165 | 0.252996  |
|  |  | C | 6.002379  | -0.655759 | 0.401380  |
|  |  | C | 5.472356  | 0.670327  | 0.325721  |
|  |  | C | 6.292018  | 1.844891  | 0.493931  |
|  |  | C | 5.767678  | 3.114324  | 0.369820  |
|  |  | C | 1.237922  | -5.080875 | -0.312722 |
|  |  | C | 2.637301  | -5.218502 | -0.117429 |
|  |  | C | 3.491768  | -4.110248 | -0.008735 |
|  |  | C | 4.907099  | -4.243100 | 0.231600  |
|  |  | C | 5.722208  | -3.145560 | 0.376080  |
|  |  | C | -0.986170 | -6.074087 | -0.641160 |
|  |  | C | 0.369336  | -6.221328 | -0.458746 |
|  |  | C | -5.329054 | 0.652193  | -0.314210 |



|  |                                  |   |           |           |           |
|--|----------------------------------|---|-----------|-----------|-----------|
|  |                                  | O | 0.432733  | 1.166763  | 1.186689  |
|  |                                  | O | 2.582255  | -0.156702 | -1.593248 |
|  |                                  | O | -1.078893 | -1.122754 | 1.770399  |
|  |                                  | N | -2.921316 | -0.248649 | 4.520953  |
|  |                                  | N | -2.497116 | -1.391847 | 3.851828  |
|  |                                  | O | -1.517219 | 0.323097  | -1.909193 |
|  |                                  | N | -5.661546 | 0.587607  | 1.169166  |
|  |                                  | N | -4.535446 | 0.414117  | 2.019531  |
|  |                                  | H | 7.363904  | 1.709606  | 0.707103  |
|  |                                  | H | 7.077678  | -0.781099 | 0.604524  |
|  |                                  | H | 6.795847  | -3.274126 | 0.584027  |
|  |                                  | H | 5.326375  | -5.257817 | 0.317196  |
|  |                                  | H | 6.420718  | 3.994459  | 0.477191  |
|  |                                  | H | 4.422943  | 5.496223  | 0.118927  |
|  |                                  | H | 3.065418  | -6.231290 | -0.046026 |
|  |                                  | H | 2.446460  | 6.974449  | -0.202500 |
|  |                                  | H | 0.816769  | -7.226943 | -0.422597 |
|  |                                  | H | -6.079790 | 3.296087  | -0.619872 |
|  |                                  | H | -6.311176 | 0.781626  | -0.815376 |
|  |                                  | H | -6.646345 | -1.723863 | -0.698608 |
|  |                                  | H | -5.652100 | -3.998027 | -0.934625 |
|  |                                  | H | -4.605949 | 5.295711  | -0.702078 |
|  |                                  | H | -2.287576 | 6.289259  | -0.577596 |
|  |                                  | H | -3.638594 | -5.480883 | -0.889729 |
|  |                                  | H | -0.001672 | 7.264028  | -0.454284 |
|  |                                  | H | -1.630422 | -6.960586 | -0.749673 |
|  |                                  | H | -4.275132 | -0.576287 | 1.983849  |
|  |                                  | H | -3.714244 | 0.940118  | 1.676313  |
|  |                                  | H | -6.103715 | 1.470597  | 1.437967  |
|  |                                  | H | -0.404230 | -0.466046 | 2.035450  |
|  |                                  | H | -1.847348 | -1.897096 | 4.459957  |
|  |                                  | H | -1.975865 | -1.242001 | 2.871102  |
|  |                                  | H | -3.630955 | 0.241019  | 3.965630  |
|  |                                  | H | -2.179031 | 0.387708  | 4.834181  |
|  | 3E_N <sub>2</sub> H <sub>3</sub> | C | 5.401249  | 2.566720  | -0.072662 |
|  |                                  | C | 4.725452  | 1.323214  | -0.221420 |
|  |                                  | C | 3.329286  | 1.313099  | -0.306111 |
|  |                                  | C | 2.575799  | 2.527268  | -0.197349 |
|  |                                  | C | 3.271678  | 3.777174  | -0.068846 |
|  |                                  | C | 4.698255  | 3.759286  | -0.017478 |
|  |                                  | C | 2.529158  | 4.989011  | 0.024569  |
|  |                                  | C | 1.130290  | 5.008016  | 0.025879  |
|  |                                  | C | 0.409351  | 3.756890  | -0.060068 |
|  |                                  | C | 1.131785  | 2.530786  | -0.174069 |
|  |                                  | C | 0.396721  | 1.312859  | -0.235460 |
|  |                                  | C | -0.997356 | 1.309440  | -0.194464 |
|  |                                  | C | -1.738089 | 2.520103  | -0.089355 |
|  |                                  | C | -1.022807 | 3.751864  | -0.018970 |
|  |                                  | C | 1.127799  | 0.038978  | -0.463049 |
|  |                                  | C | 0.457463  | -1.207445 | 0.029297  |
|  |                                  | C | -1.028210 | -1.210203 | 0.075833  |
|  |                                  | C | -1.729787 | 0.031834  | -0.378470 |

|  |  |   |           |           |           |
|--|--|---|-----------|-----------|-----------|
|  |  | C | -1.754264 | -2.491136 | -0.005782 |
|  |  | C | -1.017975 | -3.691015 | 0.013675  |
|  |  | C | 0.440639  | -3.689879 | -0.037408 |
|  |  | C | 1.176071  | -2.488725 | -0.103388 |
|  |  | C | 2.597069  | -2.474868 | -0.167482 |
|  |  | C | 3.302313  | -3.730185 | -0.114164 |
|  |  | C | 2.558285  | -4.935013 | -0.053430 |
|  |  | C | 1.154344  | -4.945212 | -0.027330 |
|  |  | C | -1.732632 | -4.943489 | 0.079618  |
|  |  | C | -0.975703 | -6.171981 | 0.082412  |
|  |  | C | 0.395888  | -6.174076 | 0.030504  |
|  |  | C | 2.615741  | 0.029190  | -0.513320 |
|  |  | C | 3.341714  | -1.244632 | -0.253999 |
|  |  | C | 4.734202  | -1.248015 | -0.218712 |
|  |  | C | 5.418154  | -2.500793 | -0.133856 |
|  |  | C | 4.731994  | -3.701134 | -0.101993 |
|  |  | C | -3.222500 | 0.014278  | -0.300612 |
|  |  | C | -3.912994 | -1.254053 | 0.019401  |
|  |  | C | -3.178879 | -2.476870 | 0.041629  |
|  |  | C | -3.884078 | -3.731217 | 0.158066  |
|  |  | C | -3.139944 | -4.930699 | 0.162048  |
|  |  | C | -3.183110 | 2.503776  | -0.013830 |
|  |  | C | -3.916996 | 1.290533  | -0.045345 |
|  |  | C | -5.329170 | 1.263838  | 0.154025  |
|  |  | C | -6.008468 | 0.015620  | 0.225024  |
|  |  | C | -5.320950 | -1.233645 | 0.193016  |
|  |  | C | -6.002023 | -2.498432 | 0.327503  |
|  |  | C | -5.315657 | -3.692590 | 0.291956  |
|  |  | C | -1.751423 | 4.994420  | 0.107292  |
|  |  | C | -3.154003 | 4.962220  | 0.185165  |
|  |  | C | -3.886787 | 3.751646  | 0.144740  |
|  |  | C | -5.316679 | 3.715528  | 0.277306  |
|  |  | C | -6.009523 | 2.523722  | 0.295127  |
|  |  | C | 0.371031  | 6.231439  | 0.131028  |
|  |  | C | -1.001924 | 6.223918  | 0.169501  |
|  |  | C | 5.555419  | 0.044369  | -0.295270 |
|  |  | O | -0.246261 | -1.017639 | 1.278612  |
|  |  | O | -2.482630 | -0.066946 | -1.585843 |
|  |  | O | 1.794121  | -0.054183 | -1.729398 |
|  |  | N | 6.637250  | 0.117405  | 0.698714  |
|  |  | N | 6.258011  | -0.028456 | 2.050446  |
|  |  | H | -7.096447 | -2.493865 | 0.449773  |
|  |  | H | -7.102414 | 0.014790  | 0.352163  |
|  |  | H | -7.103224 | 2.520496  | 0.423416  |
|  |  | H | -5.856086 | 4.669536  | 0.385158  |
|  |  | H | -5.860086 | -4.645803 | 0.379584  |
|  |  | H | -3.676147 | -5.889768 | 0.245526  |
|  |  | H | -3.703600 | 5.910565  | 0.298411  |
|  |  | H | -1.528667 | -7.123198 | 0.129900  |
|  |  | H | -1.558916 | 7.169882  | 0.257474  |
|  |  | H | 6.519092  | -2.507004 | -0.106333 |
|  |  | H | 6.069407  | 0.043925  | -1.287116 |

|  |             |                                 |
|--|-------------|---------------------------------|
|  |             | H 6.498492 2.548924 0.004371    |
|  |             | H 5.236251 4.715232 0.081053    |
|  |             | H 5.282365 -4.654042 -0.061714  |
|  |             | H 3.101528 -5.892865 -0.015897  |
|  |             | H 3.079991 5.939356 0.110607    |
|  |             | H 0.949144 -7.126144 0.035248   |
|  |             | H 0.922520 7.182892 0.187826    |
|  |             | H 5.880290 0.872792 2.371540    |
|  |             | H 5.493999 -0.720785 2.156957   |
|  |             | H 7.392514 -0.541801 0.485426   |
|  | 3E_1OH_N2H2 | C 4.670032 -1.737879 -0.199929  |
|  |             | N 5.569777 -0.722253 1.693091   |
|  |             | C 5.503407 -0.490473 0.262616   |
|  |             | C 4.883074 0.842234 -0.102383   |
|  |             | C 5.692442 2.020661 -0.165567   |
|  |             | C 5.117621 3.268087 -0.335700   |
|  |             | C 3.693815 3.435035 -0.352380   |
|  |             | C 2.867969 2.256067 -0.240551   |
|  |             | C 3.498955 0.964006 -0.202774   |
|  |             | C 3.270245 -1.574186 -0.232983  |
|  |             | C 2.657770 -0.243251 -0.364547  |
|  |             | C 1.203029 -0.100673 -0.172117  |
|  |             | C 0.660721 1.214570 0.379669    |
|  |             | C 1.464826 2.393440 -0.110341   |
|  |             | C 0.848651 3.655455 -0.201526   |
|  |             | C 1.668717 4.837364 -0.364324   |
|  |             | C 3.067091 4.701869 -0.419891   |
|  |             | C -0.585034 3.782745 -0.121999  |
|  |             | C -1.194236 5.063376 -0.165423  |
|  |             | C -0.352611 6.228125 -0.300854  |
|  |             | C 1.013785 6.119972 -0.408298   |
|  |             | C -1.403721 2.593596 -0.081773  |
|  |             | C -0.799930 1.347847 0.035053   |
|  |             | C 0.427277 -1.327030 0.177812   |
|  |             | C -1.050074 -1.180477 0.162959  |
|  |             | C -1.576264 0.155829 -0.233715  |
|  |             | C -3.131402 0.262829 -0.273854  |
|  |             | C -3.691084 1.592340 -0.047057  |
|  |             | C -2.854913 2.721070 -0.088022  |
|  |             | C -3.444378 4.045063 -0.018753  |
|  |             | C -2.615638 5.170126 -0.079360  |
|  |             | C 2.431590 -2.741342 -0.256441  |
|  |             | C 1.020595 -2.639262 -0.103702  |
|  |             | C 0.175565 -3.766001 -0.158268  |
|  |             | C -1.273829 -3.631821 -0.095451 |
|  |             | C -1.892169 -2.367868 -0.036034 |
|  |             | C -3.306711 -2.220104 0.004506  |
|  |             | C -3.920845 -0.931827 0.035102  |
|  |             | C -4.127959 -3.403468 0.085476  |
|  |             | C -3.503657 -4.668536 0.000609  |
|  |             | C -2.106424 -4.811525 -0.118561 |
|  |             | C -1.469486 -6.101569 -0.239630 |

|  |                         |                                 |
|--|-------------------------|---------------------------------|
|  |                         | C -0.105555 -6.223446 -0.345977 |
|  |                         | C 0.766733 -5.072337 -0.313712  |
|  |                         | C 2.165140 -5.183363 -0.426396  |
|  |                         | C 3.016770 -4.051412 -0.428242  |
|  |                         | C 5.184728 -2.988036 -0.466833  |
|  |                         | C 4.441234 -4.121178 -0.671364  |
|  |                         | C -5.108444 1.698557 0.185777   |
|  |                         | C -5.879932 0.531866 0.307759   |
|  |                         | C -5.309730 -0.781010 0.264317  |
|  |                         | C -6.104330 -1.976623 0.394298  |
|  |                         | C -5.541993 -3.230498 0.277794  |
|  |                         | C -4.877568 4.142597 0.131492   |
|  |                         | C -5.669816 3.027516 0.254847   |
|  |                         | O 0.892044 1.212166 1.828717    |
|  |                         | O 1.699855 -0.106618 -1.507088  |
|  |                         | O -0.323836 -1.190603 1.433640  |
|  |                         | O -2.306558 0.134681 -1.462513  |
|  |                         | N 4.555442 -0.282118 2.369302   |
|  |                         | H -7.186669 -1.870900 0.567240  |
|  |                         | H -6.967132 0.626698 0.457560   |
|  |                         | H -6.756024 3.130756 0.403213   |
|  |                         | H -5.326621 5.147197 0.174340   |
|  |                         | H -6.175551 -4.128407 0.348337  |
|  |                         | H -4.129686 -5.574539 0.038621  |
|  |                         | H -3.070565 6.173276 -0.058517  |
|  |                         | H -2.108487 -6.998220 -0.254978 |
|  |                         | H -0.832838 7.218725 -0.329531  |
|  |                         | H 6.535138 -0.589943 -0.114702  |
|  |                         | H 6.786611 1.919907 -0.096899   |
|  |                         | H 5.754631 4.161621 -0.427614   |
|  |                         | H 4.869532 -5.071554 -1.035827  |
|  |                         | H 2.613458 -6.183509 -0.540626  |
|  |                         | H 3.692500 5.605696 -0.496596   |
|  |                         | H 0.353016 -7.218973 -0.453681  |
|  |                         | H 1.634995 7.022083 -0.522042   |
|  |                         | H 3.837051 0.351954 1.984481    |
|  |                         | H 4.480867 -0.595235 3.333052   |
|  |                         | H 0.342891 0.464679 2.153240    |
|  | 3E_1OH_N <sub>2</sub> H | C 1.113269 0.209751 0.028326    |
|  |                         | C 2.551804 0.391494 -0.171770   |
|  |                         | C 0.621914 -1.164912 0.353889   |
|  |                         | C 3.188088 1.720717 -0.020023   |
|  |                         | C 3.376362 -0.802207 -0.044251  |
|  |                         | O 1.587524 0.311891 -1.315558   |
|  |                         | C 0.298794 1.368051 0.568397    |
|  |                         | C -0.846845 -1.342563 0.243741  |
|  |                         | C 1.487742 -2.327803 0.112791   |
|  |                         | O -0.211666 -1.216243 1.554073  |
|  |                         | C 2.298499 2.847086 0.027121    |
|  |                         | C 4.594049 1.878960 -0.046581   |
|  |                         | C 2.885080 -2.121607 0.006750   |
|  |                         | C 4.728331 -0.601092 -0.050479  |

|  |  |   |           |           |           |
|--|--|---|-----------|-----------|-----------|
|  |  | C | 0.886724  | 2.689867  | 0.129726  |
|  |  | C | -1.130207 | 1.188983  | 0.127671  |
|  |  | O | 0.422002  | 1.398899  | 2.019552  |
|  |  | C | -1.616265 | -0.141340 | -0.190271 |
|  |  | C | -1.390074 | -2.683966 | -0.005175 |
|  |  | C | 0.930208  | -3.607558 | 0.038846  |
|  |  | C | 2.857292  | 4.177326  | -0.056175 |
|  |  | C | 5.126559  | 3.209686  | -0.058990 |
|  |  | C | 5.404188  | 0.649767  | -0.074156 |
|  |  | C | 3.819092  | -3.234567 | -0.043451 |
|  |  | C | 5.682650  | -1.647726 | -0.060971 |
|  |  | C | 0.020893  | 3.793555  | 0.024682  |
|  |  | C | -1.971509 | 2.279067  | -0.017372 |
|  |  | H | 0.038922  | 0.547521  | 2.321092  |
|  |  | C | -3.141305 | -0.368111 | -0.343175 |
|  |  | O | -2.230061 | -0.300517 | -1.474701 |
|  |  | C | -2.802482 | -2.841902 | -0.072935 |
|  |  | C | -0.513393 | -3.788138 | 0.001552  |
|  |  | C | 1.831279  | -4.739530 | -0.047686 |
|  |  | C | 1.978129  | 5.285363  | -0.092379 |
|  |  | C | 4.287523  | 4.309469  | -0.087396 |
|  |  | H | 6.218504  | 3.340181  | -0.073306 |
|  |  | N | 6.724346  | 0.427496  | -0.092477 |
|  |  | C | 3.226992  | -4.536429 | -0.061076 |
|  |  | C | 5.238933  | -2.983939 | -0.076127 |
|  |  | N | 6.879464  | -0.942620 | -0.090110 |
|  |  | C | -1.413268 | 3.612854  | 0.016277  |
|  |  | C | 0.579130  | 5.125137  | -0.079676 |
|  |  | C | -3.412560 | 2.092246  | -0.122318 |
|  |  | C | -3.677207 | -1.712274 | -0.093474 |
|  |  | C | -3.987827 | 0.809945  | -0.152305 |
|  |  | C | -3.349825 | -4.176812 | -0.041792 |
|  |  | C | -1.061219 | -5.119104 | -0.063047 |
|  |  | C | 1.228186  | -6.054702 | -0.105730 |
|  |  | H | 2.400469  | 6.302109  | -0.137202 |
|  |  | H | 4.716528  | 5.322700  | -0.134411 |
|  |  | H | 3.884622  | -5.420027 | -0.097495 |
|  |  | H | 5.934070  | -3.835273 | -0.121276 |
|  |  | H | 7.825684  | -1.302358 | -0.099141 |
|  |  | C | -2.276863 | 4.735597  | -0.048372 |
|  |  | C | -0.331294 | 6.240198  | -0.132898 |
|  |  | C | -4.271030 | 3.260654  | -0.079820 |
|  |  | C | -5.079234 | -1.863692 | 0.026476  |
|  |  | C | -5.408585 | 0.605733  | -0.027692 |
|  |  | C | -2.461541 | -5.280659 | -0.058494 |
|  |  | C | -4.778734 | -4.309849 | 0.037991  |
|  |  | C | -0.135865 | -6.231370 | -0.105331 |
|  |  | H | 1.893222  | -6.931334 | -0.153432 |
|  |  | C | -3.693318 | 4.534812  | -0.062457 |
|  |  | C | -1.694606 | 6.055148  | -0.106138 |
|  |  | H | 0.088235  | 7.256630  | -0.193688 |
|  |  | C | -5.699329 | 3.046911  | -0.036300 |

|  |  |   |           |           |           |
|--|--|---|-----------|-----------|-----------|
|  |  | C | -5.919236 | -0.701529 | 0.029304  |
|  |  | C | -5.603728 | -3.204599 | 0.099892  |
|  |  | C | -6.242532 | 1.785695  | 0.011685  |
|  |  | H | -2.881563 | -6.299443 | -0.055453 |
|  |  | H | -5.211576 | -5.322003 | 0.067499  |
|  |  | H | -0.554125 | -7.249370 | -0.148664 |
|  |  | H | -4.350213 | 5.419451  | -0.058698 |
|  |  | H | -2.370628 | 6.923593  | -0.145571 |
|  |  | H | -6.355405 | 3.931194  | -0.014361 |
|  |  | H | -7.009425 | -0.843685 | 0.097841  |
|  |  | H | -6.693556 | -3.336692 | 0.186808  |
|  |  | H | -7.333793 | 1.653878  | 0.077625  |
